1                   **Endocytic vacuole formation by WASH-mediated endocytosis**

2

3 Pia Brinkert (1), Lena Krebs (1), Pilar Samperio Ventayol (1), Lilo Greune (2), Carina

4 Bannach (1), Delia Bucher (3), Jana Kollasser (5), Petra Dersch (2), Steeve Boulant

5 (3, 4), Theresia E.B. Stradal (5), Mario Schelhaas (1,6,\*)

6

7 (1) Institute of Cellular Virology, ZMBE, University of Münster, 48149 Münster, Germany

8 (2) Institute of Infectiology, ZMBE, University of Münster, 48149 Münster, Germany

9 (3) Department of Infectious Diseases, Virology, Heidelberg University Hospital, 69120 Heidelberg, Germany

10 (4) German Cancer Research Center (DKFZ), 69120 Heidelberg, Germany

11 (5) Department of Cell Biology, Helmholtz Centre for Infection Research, 38124 Braunschweig, Germany

12 (6) Cells in Motion Interfaculty Center, University of Münster, 48149 Münster, Germany

13 \* Lead contact: [schelhaas@uni-muenster.de](mailto:schelhaas@uni-muenster.de)

14

15

16

17 **Summary**

18 Endocytosis of extracellular or plasma membrane material is a fundamental process.  
19 A variety of endocytic pathways exist, several of which are barely understood in  
20 terms of mechanistic execution and biological function. Importantly, some  
21 mechanisms have been identified and characterized by following virus internalization  
22 into cells. This includes a novel endocytic pathway exploited by human  
23 papillomavirus type 16 (HPV16). However, its cellular role and mechanism of  
24 endocytic vacuole formation remain unclear. Here, HPV16 was used as a tool to  
25 examine the mechanistic execution of vesicle formation by combining systematic  
26 perturbation of cellular processes with electron and video microscopy. Our results  
27 indicate cargo uptake by uncoated, inward-budding pits facilitated by the membrane  
28 bending retromer protein SNX2. Actin polymerization-driven vesicle scission is  
29 promoted by WASH, an actin regulator typically not found at the plasma membrane.  
30 Uncovering a novel role of WASH in endocytosis, we propose to term the new  
31 pathway WASH-mediated endocytosis (WASH-ME).

32

### 33 **Introduction**

34 Cells internalize extracellular ligands, fluids, plasma membrane lipids and receptors  
35 by endocytosis. This is crucial for cellular and organismal homeostasis, signal  
36 transduction, intercellular communication, immune response, development and  
37 neurotransmission (Schmid and Conner, 2003). Several endocytic mechanisms exist  
38 that are distinguished by diverse criteria. Morphologically, cargo is engulfed either by  
39 outward membrane protrusions (macropinocytosis, phagocytosis) or by inward  
40 budding pits that may or may not display a visible coat in electron microscopy (EM)  
41 (e.g. clathrin-mediated endocytosis (CME), glycosphingolipid enriched endocytic  
42 carriers (GEEC)) (Heuser and Evans, 1980; Kirkham *et al.*, 2005). The cellular  
43 machinery executing endocytic vacuole formation and the destination of endocytic  
44 cargo further define the identity of endocytic pathways (Doherty and McMahon,  
45 2009). For instance, macropinocytosis occurs by growth factor-induced, actin-driven  
46 protrusions that form large vacuoles upon backfolding with help of the  
47 Bin1/Amphiphysin/Rvs (BAR) protein C-terminal binding protein 1 (CtBP1) (Liberali *et*  
48 *al.*, 2008; Lim and Gleeson, 2011). Of the inward budding mechanisms, CME occurs  
49 by sequential recruitment of adaptor proteins (AP) such as AP2 and the clathrin coat.  
50 Dynamin-2 mediated scission then leads to vacuole formation (McMahon and  
51 Boucrot, 2011; Merrifield and Kaksonen, 2014). In contrast, caveolar endocytosis  
52 occurs by preassembled coat structures (Pelkmans *et al.*, 2004; Hayer *et al.*, 2010;  
53 Stoeber *et al.*, 2016). Another criterium is cargo specificity. For instance,  
54 macropinocytosis and CME are responsible for bulk fluid uptake or specific  
55 membrane receptor internalization, respectively. A subset of GEEC is specifically  
56 responsible for lectin uptake (Lakshminarayan *et al.*, 2014). In addition to the well-  
57 established pathways, a number of less well understood endocytic mechanisms have  
58 emerged. Only little information is available on which cellular processes they

59 regulate, or on how vesicles are formed, as they are defined by their independence  
60 of classical endocytic regulators such as clathrin, caveolin, dynamin-2, or cholesterol  
61 (Doherty and McMahon, 2009). Importantly, several of these mechanisms have been  
62 identified by following the internalization of viruses such as lymphocytic  
63 choriomeningitis virus (LCMV), influenza A virus (IAV), and human papillomavirus  
64 type 16 (HPV16) (Rust *et al.*, 2004; Quirin *et al.*, 2008; Mercer, Schelhaas and  
65 Helenius, 2010; Schelhaas *et al.*, 2012).

66

67 As intracellular parasites, viruses depend on host cells for their life-cycle. This is  
68 particularly important during the initial phase of infection termed entry, during which  
69 viruses deliver their genome to the site of replication within cells. As virus particles  
70 lack locomotive abilities, they strictly rely on cellular transport mechanisms to cross  
71 the plasma membrane, the cytosol, or the nuclear envelope. Following viral particles  
72 *en route* to the site of replication thus allows to study cellular mechanisms exploited  
73 by viruses (Marsh and Helenius, 2006). Most viruses make use of endocytosis to  
74 overcome the plasma membrane. Among them is HPV16, a small non-enveloped  
75 DNA virus and the leading cause of cervical cancer (de Sanjose *et al.*, 2010;  
76 Mirabello *et al.*, 2017). HPV16 initially infects basal keratinocytes of squamous  
77 mucosal epithelia, whereas completion of its life cycle requires suprabasal  
78 keratinocyte differentiation (Doorbar, 2005). For entry, it utilizes a unique endocytic  
79 pathway for which little to no mechanistic information exists (Schelhaas *et al.*, 2012).  
80 As viruses strictly hijack existing endocytic mechanisms, the intriguing question  
81 remains which cellular cargo targets this pathway. Uptake of HPV16 into cells is slow  
82 and asynchronous, with individual virus internalization events occurring over a period  
83 of many hours after binding (Schelhaas *et al.*, 2012; Becker *et al.*, 2018). Binding to  
84 heparan sulfate proteoglycans (HSPGs) initiates crucial structural changes in the

85 virus capsid that allow transfer to an internalization receptor (complex) to induce  
86 uptake (Giroglou *et al.*, 2001; Richards *et al.*, 2006; Selinka *et al.*, 2007; Cerqueira *et*  
87 *al.*, 2013, 2015; Becker *et al.*, 2018). Uptake involves growth factor receptors  
88 (Schelhaas *et al.*, 2012; Surviladze, Dziduszko and Ozbun, 2012; Bannach *et al.*,  
89 2020), integrin  $\alpha 6$  (Evander *et al.*, 1997; Yoon *et al.*, 2001; Scheffer *et al.*, 2013),  
90 tetraspanins cluster of differentiation (CD) 151 and CD63 (Scheffer *et al.*, 2013; Fast  
91 *et al.*, 2018), and annexin A2 heterotetramer (Woodham *et al.*, 2012; Dziduszko and  
92 Ozbun, 2013). These proteins are thought to constitute specifically functionalized  
93 tetraspanin-enriched microdomains termed HPV16 entry platforms that induce  
94 uptake and co-internalize with the virus (Raff *et al.*, 2013; Florin and Lang, 2018).  
95 After endocytosis, HPV16 traffics through the endosomal system, accompanied by  
96 partial capsid disassembly (Smith *et al.*, 2008; Spoden *et al.*, 2008; Bienkowska-  
97 Haba *et al.*, 2012). From endosomes, the virus is routed to the trans-Golgi network  
98 by retrograde transport (Day *et al.*, 2013; Lipovsky *et al.*, 2013) and reaches its site  
99 of replication, the nucleus, after nuclear envelope breakdown during mitosis (Pyeon  
100 *et al.*, 2009; Aydin *et al.*, 2014).

101

102 HPV16 exploits an endocytic pathway independent of a long list of prominent  
103 endocytic regulators including clathrin, caveolin, dynamin and cholesterol. Instead, it  
104 depends on sodium/proton exchange, actin polymerization and signaling via  
105 epidermal growth factor receptor (EGFR), phosphatidylinositol-4,5-bisphosphate  
106 3-kinase, p21-activated kinase 1, protein kinase C, and Abelson tyrosine-protein  
107 kinase 2 (Abl2) (Schelhaas *et al.*, 2012; Bannach *et al.*, 2020). It remains largely  
108 elusive how these factors contribute to endocytic vesicle formation. We know,  
109 however, that EGFR and Abl2 regulate endocytosis induction and pit maturation,  
110 respectively (Bannach *et al.*, 2020). As such, the requirements for HPV16 uptake are

111 somewhat reminiscent of macropinocytosis, during which sodium/proton exchange  
112 regulates large actin-driven membrane protrusions to engulf bulk extracellular  
113 material (Doherty and McMahon, 2009; Mercer, Schelhaas and Helenius, 2010).  
114 However, HPV16 endocytosis typically involves small vesicles of about 60-100 nm  
115 diameter that contain single virus particles, and that are generated independently of  
116 cholesterol and the classical Rho-like GTPases cell division cycle 42 (Cdc42), rat  
117 sarcoma (Ras)-related C3 botulinum toxin substrate 1 (Rac1), and Ras homolog  
118 family member 1 (RhoA) (Schelhaas *et al.*, 2012; Bannach *et al.*, 2020). Perhaps, it  
119 represents a small-scale version of macropinocytosis, i.e. “micropinocytosis”  
120 (Helenius, 2018, 2020).

121

122 Here, we used HPV16 as cargo of this unique endocytic pathway to address how  
123 vesicles would be mechanistically formed. We demonstrated that HPV16  
124 endocytosis occurred via uncoated vesicles severed from the plasma membrane by  
125 actin-related proteins (Arp) 2/3 complex-dependent branched actin polymerization.  
126 Interestingly, Arp2/3 complex activation did not involve nucleation promoting factors  
127 (NPFs) typically found at the plasma membrane, but the Wiskott-Aldrich syndrome  
128 protein (WASP) and suppressor of cAMP receptor (Scar) homologue (WASH), a well-  
129 known regulator of endosomal cargo sorting. WASH was recruited to endocytic sites  
130 at the same time as sorting nexin 2 (SNX2), a BAR domain protein of the endosomal  
131 retromer complex, which supposedly assists in membrane bending during endocytic  
132 vesicle formation. Providing insights into the mechanism of a unique endocytic  
133 pathway, our findings for the first time conclusively demonstrated a direct  
134 involvement of WASH in endocytosis and implicated retromer components in  
135 endocytic cargo uptake.

136

## 137 **Results**

### 138 **HPV16 endocytosis occurred via uncoated, inward budding vesicles**

139 To assess how this unique mechanism generates endocytic vesicles, we employed  
140 HPV16 as trackable cargo in correlative light and EM (CLEM). Our goal was to  
141 visualize different stages of endocytic vacuole formation and to address whether  
142 potential coat structures were associated with these vacuoles, similar to clathrin-  
143 coated pits or caveolae. For this, fluorescent virus particles were correlated with  
144 structures on the cytosolic leaflet of plasma membrane sheets analyzed by  
145 transmission EM (TEM) of metal replicas (Heuser and Evans, 1980; Sochacki *et al.*,  
146 2014; Bucher *et al.*, 2018). As expected, different stages of clathrin-coated pit  
147 formation were readily observable at sites distinct from virus localizations (Figure  
148 1A). For HPV16, about 20% of viruses were associated with no obvious structure,  
149 likely representing virus binding to HSPGs prior to engagement of HPV16 entry  
150 platforms and endocytosis induction. A considerable proportion (31%) was correlated  
151 with dense actin network patches (Figure 1B). These may constitute anchoring  
152 structures for tetraspanin microdomains/HPV entry platforms, either prior to or during  
153 induction of endocytosis (Schelhaas *et al.*, 2008; Ménager and Littman, 2016).  
154 Importantly, inward-budding structures at virus sites were readily observed and  
155 classified into stages of vesicle formation in analogy to CME (Figures 1A and 1B).  
156 Designated as early stage, 14% of virions were associated with roughened plasma  
157 membrane patches representing initial curvature formation (Figures 1A and 1B).  
158 Small invaginations (100-150 nm in diameter) were assigned as intermediate stage,  
159 and represented pit maturation (13%). Fully rounded invaginations of 80-100 nm  
160 (22%) were classified as late-stage endocytic pits ready for scission (Figures 1A and  
161 1B). Notably, all invaginations were devoid of a discernable coat or other regular  
162 structures (Figure 1A). Thus, HPV16 endocytosis occurred by a stepwise, inward

163 budding process, in which endocytic vacuoles were formed without observable  
164 contribution of a coat structure.

165

166 Actin polymerization facilitates HPV16 endocytosis (Schelhaas *et al.*, 2012).  
167 Accordingly, perturbation of actin assembly by cytochalasin D (cytoD) reduced  
168 HPV16 infection (Figure 1C). To analyze how defective actin assembly impacts the  
169 steps of endocytic pit formation, we used CLEM of cytoD-treated cells. As expected,  
170 the actin network population was no longer detectable (Figure 1B). However, notably  
171 all stages of membrane invaginations were present to a similar extent in cytoD- and  
172 untreated samples (Figure 1B). This indicated not only that pit formation was  
173 independent of actin polymerization, but also that actin polymerization was  
174 expendable for the induction of endocytic pits responsible for HPV16 uptake. In  
175 addition, virus-correlated tubular structures devoid of an apparent coat newly  
176 appeared in cytoD-treated cells (Figure 1B). In fact, these tubular membrane  
177 invaginations were filled with virus particles (Figure 1D). This suggested a fully  
178 functional formation of endocytic structures, but a failure in vesicle scission from the  
179 plasma membrane. In conclusion, scission but not induction and membrane  
180 invagination were facilitated by polymerized or polymerizing actin filaments during  
181 HPV16 endocytosis.

182

### 183 **Actin polymerization coincided with HPV16 endocytosis**

184 Consistent with actin dynamics aiding vesicle scission in HPV16 uptake, we  
185 observed actin signals at the neck of constricted endocytic pits in immunogold  
186 labelling EM (Figure 2A). To gain insights into how the dynamics of actin at virus  
187 entry sites may facilitate vesicle scission, we employed live cell TIRF microscopy  
188 (TIRF-M). In TIRF-M, only the basal plasma membrane is observable. Hence, HPV16



189 endocytosis into the cell interior was denoted by a rapid loss of virus signal (Figures  
190 2B and 2C, Suppl. Movie 1). Virus signal loss correlated with an increase of  
191 filamentous actin signals (Figures 2B and 2C, Suppl. Movie 1) indicating actin  
192 polymerization at the time of scission. Detailed analysis of intensity profiles revealed  
193 that virus signal loss occurred for about 4 s (Figures 2C and 2D, Suppl. Movie 1).  
194 The onset of actin polymerization was somewhat variable. However, the increase in  
195 actin signals was on average initiated 7 s prior to virus internalization, peaked just  
196 before virus uptake, and decreased thereafter (Figures 2C and 2D, Suppl. Movie 1).  
197 The dynamics of actin polymerization resembled dynamin recruitment during scission  
198 in CME, starting about 20 s prior to loss of the clathrin signal from the plasma  
199 membrane (Figures S1A-S1C, Suppl. Movie 2) (Merrifield *et al.*, 2002). Since  
200 dynamin is dispensable for HPV16 endocytosis (Spoden *et al.*, 2008; Schelhaas *et*  
201 *al.*, 2012), similar recruitment profiles suggested that actin functionally replaced  
202 dynamin as a scission factor. Moreover, the dynamics of polymerization indicated  
203 that polymerized actin did not merely serve as anchor for other scission factors, but  
204 was specifically induced for and actively contributed to endocytic vesicle scission as  
205 reported for other endocytic mechanisms (Merrifield *et al.*, 2002; Pelkmans, Püntener  
206 and Helenius, 2002; Mooren, Galletta and Cooper, 2012).

207

### 208 **Branched actin polymerization regulated HPV16 endocytosis**

209 To understand the mechanism of actin polymerization for HPV16 endocytosis, we  
210 investigated the involvement of branched versus unbranched actin filaments. Formin-  
211 mediated unbranched actin polymerization was perturbed by SMIFH2, a small  
212 molecule inhibitor binding the formin homology 2 domain in formins (Rizvi *et al.*,  
213 2009). SMIFH2 treatment dose dependently decreased vesicular stomatitis virus  
214 (VSV) infection, confirming the role of formins in actin-dependent CME of VSV

215 (Figure 3A) (Cureton *et al.*, 2009). In contrast, SMIFH2 did not affect HPV16 infection  
216 (Figure 3A). Furthermore, HPV16 infection was largely unaffected by siRNA-  
217 mediated depletion of individual formins (Figure S2). However, sequestering the  
218 Arp2/3 complex as key regulator of branched actin polymerization by overexpression  
219 of the Arp2/3 binding domain of WASP and WASP-family verprolin-homologous  
220 protein (WAVE) (Scar-WA) (Machesky and Insall, 1998) strongly reduced HPV16  
221 infection compared to cells expressing a control lacking the Arp2/3 binding domain  
222 (Scar-W) (Figure 3B). In line with a requirement of branched actin polymerization,  
223 RNA interference (RNAi) with Arp3 expression reduced infection by about 80%  
224 (Figure 3C) compared to cells transfected with a non-targeting control (ctrl.).  
225 Similarly, vaccinia virus (VV) infection by macropinocytosis (Mercer and Helenius,  
226 2008; Mazzon and Mercer, 2014) was reduced upon Arp3 depletion, whereas Semliki  
227 Forest virus (SFV) uptake by actin-independent CME (Marsh and Helenius, 1980;  
228 Marsh, Kielian and Helenius, 1984; DeTulleo and Kirchhausen, 1998) was even  
229 increased (Figure 3C). Taken together, active branched but not unbranched actin  
230 polymerization was crucial for HPV16 infection.

231

232 To verify the impact on HPV16 uptake, we employed a *bona fide* virus endocytosis  
233 assay. For this, HPV16 covalently labelled with the pH-sensitive dye pHrodo was  
234 used, which gives rise to fluorescence only upon delivery to acidic endosomal  
235 organelles (Figure 3D) (Ventayol and Schelhaas, 2015; Becker *et al.*, 2018).  
236 Depletion of Arp3 reduced virus internalization by about 70% (Figure 3D). Thus,  
237 branched actin polymerization was essential for HPV16 endocytosis.

238

239 **WASH was the major NPF in HPV16 infection**

240 Since the Arp2/3 complex is inherently inactive, how is it activated for virus uptake?  
241 Several NPFs with distinct cellular functions and localizations regulate Arp2/3  
242 complex activity (Stradal and Scita, 2006; Rottner, Hänisch and Campellone, 2010).  
243 To identify, which NPF acted during HPV16 infection, we employed RNAi. Depletion  
244 of the most prominent actin regulators in endocytic processes, neuronal WASP (N-  
245 WASP) and WAVE isoforms 1 or 2, (Qualmann and Kelly, 2000; Suetsugu *et al.*,  
246 2003; Chadda *et al.*, 2007), did not alter HPV16 infection (Figures S3A-S3C and  
247 S3F). N-WASP RNAi results were confirmed in cells stably expressing a short hairpin  
248 RNA (data not shown). Taken together, N-WASP, WAVE1 and 2 were dispensable  
249 for HPV16 uptake. Consequently, a potential involvement of NPFs typically not found  
250 at the plasma membrane was assessed. Neither depletion of junction mediating and  
251 regulatory protein, p53 cofactor (JMY), a regulator of DNA damage response and cell  
252 migration (Shikama *et al.*, 1999; Zuchero *et al.*, 2009), nor depletion of WASP  
253 homolog associated with actin, Golgi membranes and microtubules (WHAMM), which  
254 is involved in the secretory pathway (Campellone *et al.*, 2008), impaired infection with  
255 HPV16 (Figures S3D-S3F). However, depletion of WASH, a well-known actin  
256 regulator of endosomal cargo sorting (Linardopoulou *et al.*, 2007; Derivery *et al.*,  
257 2009; Duleh and Welch, 2010), strongly reduced HPV16 infection, whereas VV  
258 uptake by macropinocytosis was only mildly affected (Figures 4A and S3F). In  
259 conclusion, WASH was the major NPF during HPV16 infection rather than NPFs  
260 typically found at the plasma membrane.

261

### 262 **WASH acted during late stages of HPV16 endocytic vesicle formation**

263 To date, no evidence exists that WASH facilitates endocytic vesicle formation.  
264 However, since it was the only NPF important for HPV16 infection, we hypothesized  
265 a novel role of WASH in regulating actin polymerization for endocytic vacuole

266 formation. Consistently, silencing of WASH resulted in a strong decrease of HPV16  
267 uptake (Figure 4B). In corroboration, HPV16 infection was completely abrogated in  
268 CRISPR/Cas9-derived mouse fibroblast WASH knock-out (KO) cells (NIH-3T3,  
269 Figures 4C and S4C). Ectopic expression of wild type WASH rescued HPV16  
270 infection in these cells (Figure 4C and S4A), whereas expression of WASH lacking  
271 the WASP-homology 2, central and acidic (WCA) domain crucial for Arp2/3 complex  
272 activation did not (Figure S4A). This indicated that WASH was an essential actin  
273 regulator during HPV16 uptake. In support, HPV16 infection was also strongly  
274 reduced in human osteosarcoma WASH KO cells (U2OS) (Figures S4B and S4C),  
275 which not only supported the importance of WASH for HPV16 infection, but also  
276 suggested the functional existence of WASH-dependent endocytosis in cells derived  
277 from different tissues and species.

278

279 After confirming that HPV16 binding to cells was unaffected in WASH KO cells  
280 (Figures S4D and S4E), we investigated how loss of WASH would interfere with  
281 HPV16 endocytosis by analyzing the morphology of virus-containing pits in ultra-thin  
282 section TEM. Compared to wild type cells, the endocytic pits were morphologically  
283 unaltered in WASH KO cells, i.e., they were fully formed and partially constricted at  
284 the neck (Figure 4D). Thus, early stages of endocytic vesicle formation such as  
285 induction and membrane invagination were independent of WASH. Strikingly, the  
286 average number of virus containing plasma membrane invaginations more than  
287 doubled in the absence of WASH (Figures 4D). Hence, HPV16 endocytosis was  
288 stalled at a late stage in WASH KO cells. Taken together, the roles of actin  
289 polymerization in vesicle scission, of WASH as the single NPF to promote actin  
290 polymerization, and the loss of WASH stalling HPV16 endocytosis at a late stage of

291 vesicle formation strongly suggested that WASH regulated endocytic vesicle scission  
292 but not endocytic pit formation.

293

294 To directly stimulate vesicle scission, WASH would have to be present at virus  
295 endocytosis sites. To probe recruitment of WASH to HPV16 entry platforms marked  
296 by HA-CD151 (Scheffer *et al.*, 2013), we employed the proximity ligation assay (PLA)  
297 (Söderberg *et al.*, 2006). A small fraction of virus particles co-localized with the PLA  
298 signal of WASH and CD151 (Figure S5), indicating that WASH indeed acted at virus  
299 entry sites. A limited association of HPV16 with WASH/CD151 structures was  
300 expected due to the highly asynchronous virus uptake over many hours, during which  
301 only few viruses interact with entry platforms at any given time (Schelhaas *et al.*,  
302 2012; Becker *et al.*, 2018). To more conclusively demonstrate recruitment of WASH  
303 to virus entry sites and to gain information on recruitment dynamics, WASH  
304 association in relation to uptake of HPV16 was analyzed by live cell TIRF-M. WASH  
305 was detected together with virus signals for more than 50 seconds prior to HPV16  
306 uptake and co-internalized with the virus (Figures 4E and 4F, Suppl. Movie 3). Thus,  
307 WASH was recruited already early during vesicle formation, although it likely exerted  
308 its NPF function only during scission (Figure 4D). To further investigate the stage of  
309 WASH recruitment to virus endocytic sites, we performed immunogold labelling of  
310 WASH. WASH was observed in close proximity to virus particles bound to flat plasma  
311 membrane regions (binding), slightly curved membranes associated with virus  
312 particles (early pit), and with fully formed HPV16 endocytic pits (late pit) (Figure 4G).  
313 In summary, our data supports a model in which WASH acts in a novel function  
314 during endocytosis: WASH was recruited to the plasma membrane early during pit  
315 formation, stayed associated during all stages of pit maturation (Figure 4G), and

316 acted at a late stage (Figure 4D) to initiate actin polymerization for vesicle scission  
317 during HPV16 endocytosis.

318

### 319 **The retromer BAR protein SNX2 facilitated HPV16 endocytosis**

320 How is WASH then recruited to virus entry sites? On endosomes, WASH recruitment  
321 occurs by interaction of the WASH regulatory complex with the retromer complex  
322 (Gomez and Billadeau, 2009; Harbour, Breusegem and Seaman, 2012; Jia *et al.*,  
323 2012). In line with its well established function in endosomal cargo sorting, the  
324 retromer has also been implicated in HPV16 retrograde transport to the Golgi  
325 (Lipovsky *et al.*, 2013; Popa *et al.*, 2015; Zhang *et al.*, 2018).

326

327 To analyze whether retromer components would play an additional role in HPV16  
328 uptake, we initially used retro-2, a selective inhibitor of retrograde trafficking of e.g.  
329 Shiga toxin B from endosomes to the Golgi (Bujny *et al.*, 2007; Popoff *et al.*, 2007;  
330 Stechmann *et al.*, 2010). As expected, retro-2 dose-dependently reduced HPV16  
331 infection (Figure 5A) (Lipovsky *et al.*, 2013), while herpes simplex virus 1 (HSV-1)  
332 infection was unaffected (Nicola *et al.*, 2005) (Figure 5A). HPV16 binding was  
333 unchanged in presence of retro-2 (Figure S6A). Hence, decreased infection was not  
334 a consequence of perturbed recycling and reduced receptor presentation. Next, we  
335 dissected possible effects of retro-2 on HPV16 endocytosis and retrograde  
336 trafficking, respectively. First, we selectively targeted trafficking in an inhibitor swap  
337 experiment. HPV16 uptake was allowed in presence of NH<sub>4</sub>Cl, a weak base that  
338 raises the endosomal pH and prevents onward trafficking of HPV16 (Day, Lowy and  
339 Schiller, 2003; Schelhaas *et al.*, 2012). At 12 h post infection (p.i.), when a large  
340 fraction of virus had reached endosomes, NH<sub>4</sub>Cl was swapped for retro-2 to prevent  
341 retrograde transport. HPV16 infection was dose-dependently decreased (Figure 5B),

342 in line with the requirement for HPV16 endosome-to-Golgi transport (Lipovsky *et al.*,  
343 2013). To assess potential additional effects of retro-2 on HPV16 endocytosis, we  
344 analyzed virus uptake in an infectious internalization assay. Cells were infected in  
345 presence of retro-2 for 12 h, when extracellular virions were inactivated by a high pH  
346 wash and infection by already internalized virions was allowed to continue in absence  
347 of retro-2. Uptake of infectious HPV16 was dose-dependently reduced by about 70%  
348 in presence of retro-2 (Figure 5C). In conclusion, retro-2 inhibited both retrograde  
349 trafficking (Figure 5B) and HPV16 uptake by endocytosis (Figure 5C). To determine  
350 the stage of pit formation affected by retro-2 treatment, we performed ultra-thin  
351 section TEM. Since retro-2 decreased the number of virus-containing endocytic pits  
352 by 90%, it is likely that retro-2 inhibited the initiation of pit formation (Figure 5D). In  
353 conclusion, components of the retrograde trafficking machinery already acted during  
354 early steps of HPV16 endocytosis.

355

356 To specifically address a role for the retromer in either initiation of pit formation or  
357 membrane curvature formation, we targeted retromer components by RNAi. The  
358 retromer is composed of a cargo-selective complex (CSC) of vacuolar protein sorting  
359 (Vps) 26, Vps29, and Vps35, and a dimeric membrane-bending subunit consisting of  
360 sorting nexin BAR proteins SNX1/SNX2 and SNX5/SNX6 (Seaman, 2012). As  
361 previously observed, RNAi against Vps26, Vps29 and SNX2 strongly reduced  
362 infection and suggested that both retromer subunits were required for HPV16  
363 infection (Figures 6A and S6B) (Lipovsky *et al.*, 2013; Siddiqi *et al.*, 2018). As  
364 control and to differentiate HPV16 endocytosis from macropinocytosis, depletion of  
365 CtBP1, a prominent BAR domain containing regulator of macropinocytosis (Liberali *et*  
366 *al.*, 2008; Valente, Luini and Corda, 2013), did not impair HPV16 infection (Figure  
367 6A).

368

369 Since previous work indicates that depletion of Vps29 is expendable for HPV16  
370 uptake but demonstrates an essential role of the CSC in HPV16 endosomal  
371 trafficking (Lipovsky *et al.*, 2013, 2015; Popa *et al.*, 2015; Xie *et al.*, 2020), the CSC  
372 is unlikely to facilitate HPV16 endocytosis. Recent evidence suggests that retromer  
373 BAR proteins can act independent of the CSC on endosomes (Kvainickas *et al.*,  
374 2017; Simonetti *et al.*, 2017; Yong *et al.*, 2020). Hence, we focused our attention on  
375 the role of SNX2. While binding of HPV16 to cells was unaffected upon knockdown of  
376 SNX2 (Figures S6C and S6D), HPV16 uptake was significantly reduced thereby  
377 strengthening a potential role of SNX2 in endocytosis (Figure 6B).

378

379 Similar to WASH, a direct involvement of SNX2 in endocytosis necessitates its  
380 presence at endocytic sites. During live cell TIRF-M, SNX2 and HPV16 signals co-  
381 localized for more than 50 seconds prior to virus uptake and co-internalized  
382 (Figures 6C and 6D, Suppl. Movie 4). Thus, SNX2 resembled WASH dynamics  
383 during endocytosis. Immunogold labeling confirmed that SNX2 was indeed present at  
384 the same endocytic stages than WASH, namely from virus binding to late stages of  
385 pit formation (Figure 6E). Thus, these findings indicated a novel function of the  
386 retromer protein SNX2 in facilitating HPV16 endocytosis, likely through membrane  
387 bending and/or recruitment of WASH to endocytic sites.



388 **Discussion**

389 HPV16 uptake occurs by a unique endocytic mechanism, which is distinguished from  
390 other mechanisms predominantly in negative terms, i.e., clathrin-, caveolin-,  
391 dynamin-, cholesterol-independent and morphologically distinct from  
392 macropinocytosis. This work provides evidence for a mechanistic model, in which  
393 HPV16 is internalized by inward budding of uncoated endocytic vesicles. Pit  
394 formation is facilitated by recruitment of the membrane bending retromer unit and  
395 WASH, the latter of which stimulates branched actin polymerization for scission  
396 (Figure 7). Hence, our work not only describes an unexpected direct function of  
397 SNX2 and WASH in endocytosis, but also delineates that this mechanism follows a  
398 stepwise itinerary similar to CME and distinct from macropinocytosis (Figure 7).  
399 Since WASH has neither been described at the plasma membrane nor been  
400 attributed to any other endocytic pathway, it defines the molecular identity of the  
401 unique endocytic mechanism. Thus, we propose to call this pathway WASH-  
402 mediated endocytosis (WASH-ME).

403

404 The endocytic landscape includes a variety of pathways, in which endocytic vesicle  
405 formation is achieved by different machineries. These pathways typically differ in  
406 morphology, key cargos, and molecular features (Doherty and McMahon, 2009).  
407 WASH-ME falls in the category of pathways that form endocytic vacuoles by inward  
408 budding of the plasma membrane in distinguishable steps. Thus, vesicles are formed  
409 by *de novo* assembly of the endocytic machinery in a modular manner, a mode  
410 comparable to CME (Figure 7). Vesicle formation is completed by a scission event.  
411 In many endocytic pathways, this is mediated by the large GTPase dynamin. During  
412 CME, dynamin polymerizes to form a collar that compresses the vesicle neck by an  
413 extensively discussed mechanism leading to membrane fission (Hinshaw and

414 Schmid, 1995; Takei *et al.*, 1995; Sweitzer and Hinshaw, 1998; Morlot and Roux,  
415 2013). In contrast, WASH-ME occurs independently of dynamin (Spoden *et al.*, 2008;  
416 Schelhaas *et al.*, 2012) but involves actin polymerization, which coincided with  
417 vesicle scission in a timely fashion that resembled dynamin recruitment during CME  
418 (Merrifield *et al.*, 2002; Merrifield, 2004). Hence, actin most likely facilitates vesicle  
419 scission by a force-driven mechanism rather than as anchoring structure for other  
420 scission factors. How actin polymerization creates the force for vesicle scission  
421 remains elusive. However, in analogy to observations from CME or endocytosis in  
422 *Xenopus* oocytes, actin polymerization towards the vesicle neck may serve to  
423 constrict and propel the vesicle away from the plasma membrane (Bement, Sokac  
424 and Mandato, 2003; Sokac *et al.*, 2003; Collins *et al.*, 2011).

425

426 Endocytic vesicle scission is tightly coupled to membrane remodeling (Dawson, Legg  
427 and Machesky, 2006; Shin *et al.*, 2008). This is often coordinated by BAR domain  
428 proteins, which sense and stabilize membrane bending by intrinsic curvature (Gallop  
429 *et al.*, 2006; Jao *et al.*, 2010; Qualmann, Koch and Kessels, 2011). For instance,  
430 SNX9 not only participates in dynamin recruitment (Soulet *et al.*, 2005), but also  
431 recruits and directly activates the NPF N-WASP for vesicle scission during CME  
432 (Yarar, Waterman-Storer and Schmid, 2007; Shin *et al.*, 2008). Since we  
433 demonstrated similar dynamics of SNX2 and WASH at virus entry sites during  
434 WASH-ME, perhaps SNX2 aids WASH function in a similar fashion. However,  
435 whereas SNX9 and N-WASP are recruited at late stages of CME (Taylor, Perrais and  
436 Merrifield, 2011; Kaksonen and Roux, 2018), SNX2 and WASH are already present  
437 much prior to vesicle scission. Despite the early recruitment, our findings indicated  
438 that WASH promoted actin polymerization only late during vesicle scission. Hence, in  
439 contrast to CME, recruitment and activation of the NPF are likely uncoupled in

440 WASH-ME. How SNX2 recruitment and WASH activation are induced for WASH-ME  
441 is unclear. In analogy to their function on endosomes, however, binding of SNX2 to  
442 specific phosphoinositides (Zhong *et al.*, 2002; Carlton *et al.*, 2005) and  
443 posttranslational modifications of WASH (Hao *et al.*, 2013) are likely involved in their  
444 function during WASH-ME. In line with this notion, WASH-ME is controlled by several  
445 protein and lipid kinases (Schelhaas *et al.*, 2012; Bannach *et al.*, 2020).

446

447 How WASH-ME is induced by ligand-receptor interactions is an intriguing question. In  
448 addition to mechanistic insights, it would point to the cellular role of WASH-ME and  
449 the cargo it internalizes. Likely, WASH-ME is induced only during specific cell states,  
450 as WASH is infrequently observed at the plasma membrane. It is reasonable to  
451 assume that HPV16 exploits a pathway that is highly active during infection of target  
452 cells. These are basal keratinocytes of the mucosal epidermis that become  
453 accessible to the virus upon epidermal wounding (Doorbar, 2005; Roberts *et al.*,  
454 2007; Aksoy, Gottschalk and Meneses, 2017). Wounding and other cellular  
455 responses stimulate epithelial to mesenchymal transition and cell migration, which  
456 are accompanied by the remodeling of cell-matrix adhesion complexes, such as focal  
457 adhesions and hemidesmosomes (HDs) (Jones, Hopkinson and Goldfinger, 1998;  
458 Borradori and Sonnenberg, 1999; Webb, Parsons and Horwitz, 2002; Ezratty,  
459 Partridge and Gundersen, 2005; Walko, Castañón and Wiche, 2015). To date, little is  
460 known about the dynamics of HD remodeling during cell migration, but HD containing  
461 plasma membrane domains can be rapidly endocytosed upon detachment from the  
462 underlying extracellular matrix (ECM) (Owaribe *et al.*, 1990). Since HDs contain  
463 integrin  $\alpha 6$  and CD151, which are part of the HPV16 entry platform (Scheffer *et al.*,  
464 2013; Walko, Castañón and Wiche, 2015; Mikuličić *et al.*, 2019), WASH-ME may  
465 promote HD uptake during wound healing to aid cell migration and thereby wound

466 closure. Another essential process during wound healing is matrix remodeling.  
467 Interestingly, WASH was previously implicated in apical endocytosis of extracellular  
468 material in the *Drosophila* airway epithelium during embryogenesis (Tsarouhas *et al.*,  
469 2019). Hence, WASH-ME could also contribute to matrix remodeling as a specialized  
470 mechanism for internalization of extracellular material.

471

472 While extensive future research will have to address the cellular role of WASH-ME,  
473 its role in pathogen invasion may be of considerable interest as well. For instance,  
474 WASH is recruited to the plasma membrane during *Salmonella* infection presumably  
475 serving as one of several entry pathways (Hänisch *et al.*, 2010). Moreover, WASH  
476 regulatory complex protein family with sequence similarity 21 co-localizes with a  
477 subset of VV particles in plasma membrane lipid rafts (Huang *et al.*, 2008). Thus,  
478 WASH-ME may constitute an important entry route for pathogens. Accordingly,  
479 viruses such as IAV and LCMV exploit pathways with endocytic vacuole morphology  
480 and mechanistic requirements similar yet not identical to HPV16 endocytosis  
481 (Sieczkarski and Whittaker, 2002; Quirin *et al.*, 2008; Rojek, Perez and Kunz, 2008;  
482 de Vries *et al.*, 2011).

483

484 The identification of SNX2 and WASH marks the beginning of a deeper  
485 understanding of the mechanism underlying WASH-ME. Future research will aim to  
486 reveal its cellular function, to identify additional components and the functional  
487 interplay of the machinery in this uncharacterized new endocytic pathway to better  
488 understand the mechanism of WASH-ME.

489

490

491

492

493 **Limitations of the study**

494 This work describes a novel function of the NPF WASH in regulating actin  
495 polymerization for vesicle scission, thereby defining a molecular identity of a unique  
496 endocytic pathway exploited by HPV16 for infection. Based on the fact that HPV16  
497 uptake through WASH-ME occurs highly asynchronously over many hours, only very  
498 few endocytic events are observable per cell at any given time post infection. Thus,  
499 identification of endocytic structures proves to be challenging. For example,  
500 colocalization analysis with marker proteins leads to statistically inconclusive results.  
501 While dynamic association of cellular proteins with HPV16 during uptake delineated  
502 by TIRF-M as well as identification of endocytic pits by EM together with immunogold  
503 labelling of cellular proteins demonstrated WASH and SNX2 localization and  
504 recruitment to endocytic pits events, the sample size of these experiments is limited if  
505 compared to typical colocalization experiments.

506 **Acknowledgements**

507 We thank I. Fels (Institute of Cellular Virology, Münster, Germany) for technical  
508 support during virus production and U. Westerkamp as well as M. Dominguez (both  
509 Institute of Cellular Virology, Münster, Germany) for assistance with experiments. We  
510 are indebted to numerous individuals for sharing valuable reagents as indicated in  
511 material and methods. We acknowledge the Infectious Diseases Imaging Platform at  
512 the University Hospital Heidelberg, K. Richter from the Core Facility Unit Electron  
513 Microscopy at the DKFZ Heidelberg and S. Hillmer from the Electron Microscopy  
514 Core Facility of the University Heidelberg for their technical support. This work was  
515 supported by funding of the German Research Foundation (DFG) to MS (grants  
516 SCHE 1552 6-2 and INST211/817A09), and to SB (grant BO 4340/2-1).

517

518 **Author contributions**

519 Conceived and designed experiments: PB, LK, PSV, CB, TS, MS; Performed  
520 experiments: PB, LK, PSV, LG, CB, DB, JK; Analyzed data: PB, LK, PSV, LG, CB,  
521 DB, JK, SB, TS, MS; Resources: PD, SB, TS, MS; Writing: PB, LK, MS with input  
522 from the other authors.

523

524 **Declaration of interests**

525 The authors declare no competing interests.

526 **Figure legends**

527 **Figure 1 HPV16 endocytosis as an uncoated, inward budding mechanism**

528 (A) HaCaT cells were seeded on HPV16-AF568 bound to ECM, treated with 10 µg/ml  
529 cytoD or DMSO and unroofed. Fluorescent virus particles imaged by spinning disk  
530 microscopy and depicted in the small insets were correlated with structures identified  
531 in TEM images of platinum/carbon replicas of unroofed membranes. Arrowheads  
532 indicate endocytic pits. (B) Depicted is the percentage of particles associated with the  
533 indicated structure ± variation between the membranes (DMSO: 134 viruses/  
534 7 membranes; cytoD: 101 viruses/5 membranes). Of note, about 20-25% of particles  
535 were not associated with any prominent structure. (C) HeLa ATCC cells were  
536 infected with HPV16-GFP in presence of cytoD. Infection was scored by flow  
537 cytometry and normalized to DMSO treated controls. The mean of three experiments  
538 ± SD is shown. (D) HeLa ATCC cells treated with 10 µg/ml CytoD or left untreated  
539 (ctrl.) were infected with HPV16-GFP and processed for ultra-thin section TEM at 6 h  
540 p.i.. All scale bars are 100 nm.

541

542 **Figure 2 Actin polymerization coincided with HPV16 uptake**

543 (A) HeLa ATCC cells were infected with HPV16-GFP, subjected to immunogold  
544 labeling of actin on ultra-thin cryosections, and analyzed by TEM. Asterisks indicate  
545 HPV16 in endocytic pits. Scale bars are 100 nm. (B) HeLa ATCC cells were  
546 transfected with lifeact-EGFP, infected with HPV16-AF594 and imaged by live cell  
547 TIRF-M at 1 h p.i.. Movies were acquired with 0.5 Hz frame rate for 5 min. HPV16  
548 entry events were identified manually after background subtraction and filtering. The  
549 yellow box indicates the virus entry event shown as a kymograph (right) and intensity  
550 profile (C). Scale bar is 2 µm. (C) Plotted are the intensity profiles of HPV16 and  
551 lifeact (light red/green) as well as moving averages (intense red/green). Values are

552 depicted relative to the half time of virus loss ( $t = 0$ ). The time points of the onset of  
553 actin polymerization (1) and of virus signal loss (2) from the cell surface, as well as of  
554 actin peak intensity (3) and of completion of virus uptake (4) were determined  
555 manually. (D) Time points were determined for 21 virus entry events as indicated in  
556 (C), averaged and are depicted as box plots.

557

### 558 Figure 3 **Branched actin polymerization mediated HPV16 endocytosis**

559 (A) HeLa ATCC cells were infected with HPV16-GFP or VSV-GFP in presence of the  
560 formin inhibitor SMIFH2. Infection was scored by flow cytometry, normalized to  
561 solvent treated controls and is depicted as mean  $\pm$  SD (HPV16:  $n = 3$ , VSV:  $n = 4$ ).  
562 (B) HeLa ATCC cells transfected with Scar-W-GFP or Scar-WA-GFP were infected  
563 with HPV16-RFP. Infection of transfected cells was analyzed by microscopy,  
564 normalized to Scar-W-GFP control cells and is depicted as the mean of three  
565 experiments  $\pm$  SD. (C) HeLa Kyoto cells were depleted of Arp3 and infected with  
566 HPV16-GFP, VV-GFP or SFV. Infection was scored by automated microscopy or  
567 flow cytometry, normalized to cells transfected with a non-targeting control siRNA  
568 (ctrl.) and is depicted as mean  $\pm$  SD (HPV16/SFV:  $n = 3$ , VV:  $n = 4$ ). (D) Arp3  
569 depletion was followed by infection with HPV16-pHrodo and live cell spinning disk  
570 microscopy at 6 h p.i.. Shown are average intensity projections of the HPV16-pHrodo  
571 signal with cell outlines (yellow), scale bar is 25  $\mu$ m. Virus signal intensities per cell  
572 were measured using a CellProfiler pipeline and normalized to ctrl. ( $n = 4$ , mean  
573  $\pm$  SD). Knock down levels were analyzed by Western blotting against Arp3.

574

### 575 Figure 4 **WASH associated early, but acted late during HPV16 uptake**

576 (A) HeLa Kyoto cells were depleted of WASH and infected with HPV16-GFP or VV-  
577 GFP. Infection was determined by automated microscopy and flow cytometry and



578 normalized to cells transfected with a control siRNA (ctrl.) (n = 4, mean  $\pm$  SD.) (B)  
579 After depletion of WASH or Arp3, cells were infected with HPV16-pHrodo and  
580 imaged live by spinning disk microscopy at 6 h p.i.. Shown are average intensity  
581 projections of the HPV16-pHrodo signal with cell outlines (yellow), scale bar is 25  
582  $\mu$ m. The intensity of virus signal per cell was normalized to ctrl. and is depicted as the  
583 mean of three experiments  $\pm$  SD. (C) EGFP (ctrl.) or EGFP-WASH were expressed  
584 in NIH-3T3 wild type and WASH KO cells. Infection with HPV16-RFP was scored by  
585 flow cytometry and normalized to wild type cells expressing EGFP (ctrl.). Values are  
586 depicted as the mean  $\pm$  SD (n = 3). (D) NIH-3T3 wild type and WASH KO infected  
587 with HPV16-GFP were subjected to ultra-thin section TEM at 6 h p.i.. The number of  
588 virus filled plasma membrane invaginations was determined for 43 cells per cell line  
589 in two independent experiments. Total pit numbers were normalized to wild type cells  
590 and are depicted as mean  $\pm$  SD. Scale bars are 100 nm. (E) HeLa ATCC cells  
591 transfected with EGFP-WASH were infected with HPV16-AF647. Cells were imaged  
592 by live cell TIRF-M at 1 h p.i.. Movies were acquired with 0.5 Hz frame rate for 5 min.  
593 HPV16 entry events were identified manually after background subtraction and  
594 filtering. Shown is a kymograph of the virus entry event highlighted by the yellow box,  
595 and the corresponding EGFP-WASH signal. Scale bar is 2  $\mu$ m. (F) Intensity profiles  
596 of HPV16 and WASH (light red/green) as well as moving averages (intense  
597 red/green) of the virus entry event shown in (E) depicted relative to the half time of  
598 virus loss (t = 0). (G) HeLa ATCC cells were transfected with EGFP-WASH and  
599 infected with HPV16. At 6 h p.i., cells were subjected to immunogold labeling of GFP  
600 (WASH, 15 nm gold) and actin (10 nm gold) on ultra-thin cryosections analyzed by  
601 TEM. Asterisks indicate HPV16 particles, black and white arrowheads indicate  
602 WASH staining and the membrane, respectively. Scale bars are 100 nm.  
603

604 **Figure 5 Components of the retrograde trafficking pathway acted early during**  
605 **HPV16 endocytosis**

606 (A) HeLa Kyoto cells were treated with retro-2 and infected with HPV16-GFP or  
607 HSV-1-GFP. Infection was scored by flow cytometry and normalized to solvent  
608 treated controls (n = 3, mean  $\pm$  SD). (B) HeLa Kyoto cells were infected with HPV16-  
609 GFP in presence of 10 mM NH<sub>4</sub>Cl. At 12 h p.i., NH<sub>4</sub>Cl was washed out and infection  
610 was continued in presence of 100  $\mu$ M retro-2. Infection was scored by flow cytometry  
611 at 48 h p.i. and normalized to solvent treated controls. The mean of three  
612 experiments  $\pm$  SD is shown. (C) HeLa Kyoto cells were treated with 100  $\mu$ M retro-2  
613 and infected with HPV16-GFP. At 12 h p.i., extracellular virus was inactivated by a  
614 basic pH wash. Infection was continued in absence of the inhibitor and scored by  
615 flow cytometry. Depicted is the fraction of infected cells after the basic wash  
616 normalized to DMSO treated cells washed with PBS as the mean of three  
617 experiments  $\pm$  SD. (D) HeLa Kyoto cells were infected with HPV16-GFP in presence  
618 of 100  $\mu$ M retro-2 and subjected to ultra-thin section TEM at 6 h p.i.. Scale bars are  
619 100 nm. The number of virus filled plasma membrane invaginations was determined  
620 for 34 and 32 cells in untreated and retro-2 treated cells, respectively, in two  
621 independent experiments, normalized to control cells and is depicted as the mean  $\pm$   
622 SD.

623

624 **Figure 6 The retromer protein SNX2 resembled WASH dynamics**

625 (A) HeLa Kyoto cells were depleted of Vps26a, Vps29, SNX2 or CtBP1 and infected  
626 with HPV16-GFP. Infection was scored by automated microscopy and normalized to  
627 ctrl. (n = 3, mean  $\pm$  SD). (B) Cells were depleted of Arp3 or SNX2 and infected with  
628 HPV16-pHrodo followed by live cell imaging at 6 h p.i.. Shown are average intensity  
629 projections of the HPV16-pHrodo signal acquired by spinning disk microscopy. Cell

630 outlines in yellow were manually created with brightfield images, scale bar is 25  $\mu$ m.  
631 The intensity of virus signal per cell was normalized to ctrl. and is shown as mean  
632  $\pm$  SD (SNX2: n = 3, Arp3: n = 2). (C) HeLa ATCC cells were transfected with EGFP-  
633 SNX2, infected with HPV16-AF647 and imaged live by TIRF-M at 1 h p.i.. Movies  
634 were acquired with 0.5 Hz frame rate for 5 min. HPV16 entry events were identified  
635 manually after background subtraction and filtering. Shown is a kymograph of the  
636 virus entry event highlighted with the yellow box and the corresponding EGFP-SNX2  
637 signal. Scale bars is 2  $\mu$ m. (D) Intensity profiles of HPV16 and SNX2 (light red/green)  
638 as well as moving averages (intense red/green) of the virus entry event shown in (C)  
639 depicted relative to the half time of virus loss ( $t = 0$ ). (E) HeLa ATCC cells were  
640 transfected with EGFP-SNX2, infected with HPV16 and subjected to immunogold  
641 labeling of EGFP-SNX2 on ultra-thin cryosections analyzed by TEM at 6 h p.i.. Black  
642 and white arrowheads indicate SNX2 staining and the membrane, respectively,  
643 asterisks mark virus particles. Scale bars are 100 nm.

644

#### 645 Figure 7 **Model**

646 Schematic model of the mechanistic regulation of endocytic vesicle formation during  
647 WASH-ME in comparison to CME and macropinocytosis. Additional regulators  
648 involved in the latter mechanisms were omitted for clarity.

649 **Supplemental figure legends**

650 **Figure S1 Kinetics of dynamin recruitment during CME resembled actin**  
651 **dynamics during HPV16 uptake** (Related to Figure 2)

652 (A) HeLa ATCC cells were co-transfected with mRFP-clathrin light chain (CLC) and  
653 EGFP-dynamin 2 (Dyn2). Cells were imaged by live cell TIRF-M. Movies were  
654 acquired with 0.5 Hz frame rate for 5 min. CME events denoted by CLC signal loss  
655 were identified manually after background subtraction and filtering. The yellow box  
656 indicates the CME event shown as kymograph. Scale bar is 2  $\mu\text{m}$ . (B) Plotted are the  
657 intensity profiles of CLC and Dyn (light red/green) as well as moving averages  
658 (intense red/green). Note that due to its additional role in vesicle maturation, Dyn2  
659 was already present early during vesicle formation (Loerke *et al.*, 2009; Taylor,  
660 Lampe and Merrifield, 2012). A second wave of recruitment was observed for  
661 scission and quantified in (C). (C) The onset of Dyn2 recruitment for scission (1)  
662 relative to the half time of CLC loss from the cell surface ( $t = 0$ ) as well as the  
663 timepoint of the completion of CLC (3) and Dyn2 (2) signal loss were manually  
664 determined from intensity profiles. Values from 10 profiles were plotted.

665

666 **Figure S2 Unbranched actin polymerization regulated by formins was not**  
667 **required for HPV16 infection** (Related to Figure 3)

668 HeLa Kyoto cells were depleted of individual formins and infected with HPV16-GFP.  
669 Infection was scored by automated microscopy and normalized to ctrl., siRNAs that  
670 reduced cell numbers by more than 80% were considered cytotoxic ( $\dagger$ ) and excluded  
671 from the analysis. Depicted is the mean of three experiments  $\pm$  SD.

672

673

674 **Figure S3 The NPFs N-WASP, WAVE, WHAMM and JMY were dispensable for**  
675 **HPV16 infection** (Related to Figure 4)

676 HeLa Kyoto cells were infected with HPV16-GFP after siRNA mediated depletion of  
677 N-WASP (A), WAVE1 (B), WAVE2 (C), JMY (D), WHAMM (E). Infection was scored  
678 by automated microscopy, normalized to ctrl. and is depicted as the mean  $\pm$  SD (n =  
679 3). (F) Protein expression levels were determined by Western blotting against the  
680 siRNA target proteins.

681

682 **Figure S4 The WASH WCA domain was essential for HPV16 infection** (Related to  
683 Figure 4)

684 (A) EGFP (ctrl.), YFP-WASH or YFP-WASH lacking the WCA domain (dWCA) were  
685 expressed in NIH-3T3 wild type and WASH KO cells. Cells were infected with  
686 HPV16-RFP. Infection was scored by flow cytometry and normalized to wild type  
687 cells transfected with EGFP(ctrl.). Values are depicted as mean  $\pm$  SD of three  
688 independent experiments. (B) U2OS wild type and WASH KO cells were infected  
689 with HPV16-GFP. Infection was analyzed by flow cytometry and normalized to wild  
690 type cells (mean  $\pm$  SD, n = 8). (C) WASH KO in NIH-3T3 and U2OS cells was  
691 confirmed by immunoblotting against WASH. (D) HPV16-AF488 was bound to NIH-  
692 3T3 WASH KO cells. Virus pre-incubated with 1 mg/ml heparin was used as a non-  
693 binding control. At 2 h p.i., virus binding was measured by flow cytometry. Values are  
694 shown as relatives to wild type cells and depicted as mean of three experiments  
695  $\pm$  SD. (E) Binding of HPV16-AF568 was performed as in (D). After fixation, the actin  
696 cytoskeleton was stained with phalloidin-Atto488. Shown are maximum intensity  
697 projections of z-stacks acquired by spinning disk microscopy, scale bars are 10  $\mu$ m.

698

699 **Figure S5 PLA indicated WASH recruitment to virus entry sites** (Related to  
700 Figure 4)

701 HPV16-AF488 was bound to ECM. HaCaT cells transfected with the entry platform  
702 protein HA-CD151 were seeded on top. Close proximity between WASH and HA-  
703 CD151 was detected using a PLA and plasma membrane localization was analyzed  
704 by TIRF-M. Scale bars are 2  $\mu\text{m}$  and 0.5  $\mu\text{m}$ .

705

706 **Figure S6 Retro-2 treatment and SNX2 knock down did not affect HPV16**  
707 **binding** (Related to Figures 5 and 6)

708 (A) Confluent HeLa Kyoto cells were infected with HPV16-AF488 or -AF594 for 2 h in  
709 presence of 100  $\mu\text{M}$  retro-2. Pre-incubation of the virus with 1 mg/ml heparin was  
710 used as a non-binding control. The intensities of fluorescent HPV16 were determined  
711 by spinning disk microscopy and normalized to solvent treated control cells. Depicted  
712 are mean values from three experiments  $\pm$  SD. (B) Depletion of siRNA target proteins  
713 was confirmed by Western blotting. (C) HPV16-AF488 was bound to HeLa Kyoto  
714 cells depleted of SNX2 for 2 h. Virus binding was determined by flow cytometry.  
715 Values are shown as relatives to ctrl. (mean of three independent experiments  $\pm$  SD).  
716 (D) HPV16-AF568 was bound to HeLa Kyoto cells depleted of SNX2 as above.  
717 Spinning disk microscopy was employed after actin staining with phalloidin-Atto488.  
718 Shown are maximum intensity projections of z-stacks, scale bar is 10  $\mu\text{m}$ .

719 **STAR methods**

720 **KEY RESOURCES TABLE**

| REAGENT or RESOURCE                                 | SOURCE                                                                                                       | IDENTIFIER  |
|-----------------------------------------------------|--------------------------------------------------------------------------------------------------------------|-------------|
| <b>Antibodies</b>                                   |                                                                                                              |             |
| mouse anti actin (4F7)                              | BRICS                                                                                                        | bsbs300470  |
| rabbit polyclonal anti Arp3                         | (Steffen <i>et al.</i> , 2006)                                                                               | N/A         |
| mouse monoclonal (11G5a) anti CD151                 | Bio Rad                                                                                                      | MCA1856GA   |
| mouse monoclonal (3) anti CtBP1                     | Becton Dickinson                                                                                             | 612042      |
| rabbit polyclonal anti ERK2 (C-14)                  | Santa Cruz Biotechnology                                                                                     | sc-154      |
| rabbit polyclonal anti GFP                          | Abcam                                                                                                        | ab290       |
| mouse monoclonal anti HA (16B12)                    | Covance                                                                                                      | MMS-101R    |
| goat polyclonal anti JMY (L-16)                     | Santa Cruz Biotechnology                                                                                     | sc-10027    |
| primary rabbit antiserum "Lady Di" against SFV E1/2 | kind gift from A. Helenius (ETH Zurich, Switzerland), (Singh and Helenius, 1992)                             | N/A         |
| mouse monoclonal (13) anti SNX2                     | Becton Dickinson                                                                                             | 611308      |
| mouse monoclonal (B-5-1-2) anti tubulin             | Sigma-Aldrich                                                                                                | T5168       |
| rabbit polyclonal anti Vps26a                       | Abcam                                                                                                        | Ab137447    |
| rabbit polyclonal anti Vps29                        | Abcam                                                                                                        | Ab98929     |
| rabbit polyclonal anti WASH                         | kind gift from A. Gautreau (Institut Polytechnique De Paris, Paris, France), (Derivery <i>et al.</i> , 2009) | N/A         |
| rabbit polyclonal anti WASH                         | Atlas Antibodies                                                                                             | HPA002689   |
| rabbit polyclonal anti WAVE1                        | Sigma-Aldrich                                                                                                | W2142       |
| rabbit polyclonal anti WAVE2 (H-110)                | Santa Cruz Biotechnology                                                                                     | sc-33548    |
| rabbit polyclonal anti WHAMM (K-13)                 | Santa Cruz Biotechnology                                                                                     | sc-136951   |
| goat anti-mouse AF488 IgG                           | Thermo Fisher Scientific                                                                                     | A-11029     |
| goat anti-mouse AF647 IgG                           | Thermo Fisher Scientific                                                                                     | A-21235     |
| goat anti-rabbit AF488 IgG                          | Thermo Fisher Scientific                                                                                     | A-11034     |
| rabbit anti mouse IgG + IgM                         | Dianova                                                                                                      | 315-005-048 |
| sheep anti-mouse HRP linked IgG                     | GE Healthcare                                                                                                | NA931       |
| donkey anti-rabbit HRP linked IgG                   | GE Healthcare                                                                                                | NA934       |
| Duolink In Situ PLA Probe anti-mouse PLUS           | Sigma-Aldrich                                                                                                | DUO92001    |
| Duolink In Situ PLA Probe anti-rabbit MINUS         | Sigma-Aldrich                                                                                                | DUO92005    |
| Protein A gold 10 nm                                | CMC, UMC Utrecht                                                                                             | N/A         |
| Protein A gold 15 nm                                | CMC, UMC Utrecht                                                                                             | N/A         |
| <b>Bacterial and Virus Strains</b>                  |                                                                                                              |             |
| <i>E. coli</i> DH5a                                 | kind gift from A. Helenius (ETH Zurich, Switzerland)                                                         | N/A         |
| HPV16-GFP pseudoviruses (PsVs)                      | (Buck and Thompson, 2007)                                                                                    | N/A         |
| HPV16-RFP PsVs                                      | (Johnson <i>et al.</i> , 2009)                                                                               | N/A         |
| HSV-1-EGFP (17syn <sup>+</sup> )                    | kind gift from W. Hafezi (University of Münster, Germany) (Hafezi <i>et al.</i> , 2012)                      | N/A         |
| SFV (prototype strain)                              | kind gift from A. Helenius (ETH Zurich, Switzerland), (Marsh and Helenius, 1980)                             | N/A         |
| VSV-GFP (Indiana)                                   | kind gift from A. Helenius (ETH Zurich, Switzerland) (Johannsdottir <i>et al.</i> , 2009)                    | N/A         |

|                                                      |                                                                                           |          |
|------------------------------------------------------|-------------------------------------------------------------------------------------------|----------|
| VV-GFP (Western Reserve)                             | kind gift from J. Mercer (UCL London, UK), (Mercer and Helenius, 2008)                    | N/A      |
| <b>Chemicals, Peptides, and Recombinant Proteins</b> |                                                                                           |          |
| AGAR 100 Resin kit (Epoxy resin)                     | Agar Scientific                                                                           | R1031    |
| Alexa Fluor 488 succinimidyl ester                   | Thermo Fisher Scientific                                                                  | A20000   |
| Alexa Fluor 568 succinimidyl ester                   | Thermo Fisher Scientific                                                                  | A20003   |
| Alexa Fluor 594 succinimidyl ester                   | Thermo Fisher Scientific                                                                  | A20004   |
| Alexa Fluor 647 succinimidyl ester                   | Thermo Fisher Scientific                                                                  | A20006   |
| bafilomycin A1                                       | Applichem                                                                                 | A7823    |
| Brij-58                                              | Sigma-Aldrich                                                                             | P5884    |
| cytochalasin D                                       | Sigma-Aldrich                                                                             | C8273    |
| glutaraldehyde, EM grade                             | Polysciences                                                                              | 01909    |
| heparin                                              | Sigma-Aldrich                                                                             | H4784    |
| Lipofectamine 2000                                   | Invitrogen                                                                                | 11668019 |
| Lipofectamine RNAi max                               | Invitrogen                                                                                | 13778075 |
| osmium tetroxide                                     | Electron Microscopy Sciences                                                              | 19100    |
| paraformaldehyde, EM grade                           | Polysciences                                                                              | 00380    |
| phalloidin-Atto488                                   | Sigma-Aldrich                                                                             | 49409    |
| pHrodo Red succinimidyl ester                        | Thermo Fisher Scientific                                                                  | P36600   |
| retro-2                                              | ChemBridge                                                                                | 5374762  |
| RedDot2                                              | VWR                                                                                       | 40061-1  |
| ROCK inhibitor                                       | Becton Dickinson                                                                          | Y-27632  |
| SMIFH2                                               | Sigma-Aldrich                                                                             | S4826    |
| uranyl acetate                                       | Polysciences                                                                              | 21447    |
| X-tremeGENE™ 9                                       | Merck                                                                                     | XTG9-RO  |
| <b>Critical Commercial Assays</b>                    |                                                                                           |          |
| Duolink In Situ Detection Reagents Red               | Sigma-Aldrich                                                                             | DUO92008 |
| <b>Experimental Models: Cell Lines</b>               |                                                                                           |          |
| Hamster: BHK-21-Helsinki                             | kind gift from A. Helenius (ETH Zurich, Switzerland) (Johannsdottir <i>et al.</i> , 2009) | N/A      |
| Hamster: BHK-21                                      | kind gift from W. Hafezi (University of Münster, Germany) (Hafezi <i>et al.</i> , 2012)   | N/A      |
| African green monkey: BSC-40                         | kind gift from J. Mercer (UCL London, UK), (Brockman and Nathans, 1974)                   | N/A      |
| Human: HaCaT                                         | (Boukamp <i>et al.</i> , 1988)                                                            | N/A      |
| Human: HeLa ATCC                                     | ATCC (Manassas, USA)                                                                      | N/A      |
| Human: HeLa Kyoto                                    | kind gift from L. Pelkmans (ETH Zurich, Switzerland), (Landry <i>et al.</i> , 2013)       | N/A      |
| Mouse: NIH 3T3                                       | ATCC (Manassas, USA)                                                                      | N/A      |
| Mouse: NIH 3T3 WASH KOs                              | this study                                                                                | N/A      |
| Human: U2OS                                          | German collection of Microorganisms and Cell Cultures (DSMZ, Braunschweig, Germany)       | N/A      |
| Human: U2OS WASH KOs                                 | this study                                                                                | N/A      |
| Non-human, primate: Vero                             | ATCC (Manassas, USA)                                                                      | N/A      |



|                                                           |                                                                                                     |       |
|-----------------------------------------------------------|-----------------------------------------------------------------------------------------------------|-------|
| Human: 293 TT                                             | kind gift from J. Schiller (NIH, Bethesda, USA) (Buck <i>et al.</i> , 2005)                         | N/A   |
| <b>Oligonucleotides</b>                                   |                                                                                                     |       |
| refer to supplemental table 1 for siRNAs                  |                                                                                                     |       |
| single guide RNA (sgRNA) WASH exon 2 (murine, top strand) | GCGACGAGAGGAGGCAA<br>TCC                                                                            |       |
| sgRNA WASH exon 2 (murine, bottom strand)                 | GGATTGCCTCCTCTCGTC<br>GC                                                                            |       |
| sgRNA WASH exon 4 (human, top strand)                     | TCTTCACGGGCGCCCAG<br>GAC                                                                            |       |
| sgRNA WASH exon 4 (human, bottom strand)                  | GTCCTGGGCGCCCGTGA<br>AGA                                                                            |       |
| sgRNA WASH exon 5 (human, top strand)                     | GTGTGCGTGAGCACCAA<br>GCC                                                                            |       |
| sgRNA WASH exon 4 (human, bottom strand)                  | GGCTTGGTGCTCACGCA<br>CAC                                                                            |       |
| murine WASH sequencing primer (forward)                   | ATAGGCAGAGGGGTGAG<br>TGT                                                                            |       |
| murine WASH sequencing primer (reverse)                   | ACACTGGGCATTAGTTG<br>GGT                                                                            |       |
| M13r primer for TOPO vector                               | CAGGAAACAGCTATGAC                                                                                   |       |
| <b>Recombinant DNA</b>                                    |                                                                                                     |       |
| Plasmid: pSpCas9(BB)-2A-GFP (pX458)                       | Addgene                                                                                             | 48138 |
| Plasmid: pEGFP C1_CD151                                   | kind gift from L. Florin (Johannes Gutenberg University Mainz, Germany) (Liu <i>et al.</i> , 2007)  | N/A   |
| Plasmid: pcDNA3 HA_CD151                                  | this study                                                                                          | N/A   |
| Plasmid: pmRFP C3_Clc                                     | kind gift from A. Helenius (ETH Zurich, Switzerland)                                                | N/A   |
| Plasmid: pEGFP-Dyn2                                       | kind gift from M. A. McNiven (Mayo Clinic, Rochester, USA) (Cao, Garcia and McNiven, 1998)          | N/A   |
| Plasmid: pCIneoEGFP                                       | kind gift from C. Buck (NIH, Bethesda, USA) (Buck and Thompson, 2007)                               | N/A   |
| Plasmid: Lifeact_EGFP-N1                                  | kind gift from R. Wedlich-Söldner (University of Münster, Germany) (Riedl <i>et al.</i> , 2008)     | N/A   |
| Plasmid: pEGFP C1                                         | kind gift from A. Helenius (ETH Zurich, Switzerland)                                                | N/A   |
| Plasmid: pRwB                                             | kind gift from C. Buck (NIH, Bethesda, USA) (Johnson <i>et al.</i> , 2009)                          | N/A   |
| Plasmid: pEGFP C1_Scar-W-GFP                              | (Machesky and Insall, 1998)                                                                         | N/A   |
| Plasmid: pEGFP-C1_Scar-WA-GFP                             | (Machesky and Insall, 1998)                                                                         | N/A   |
| Plasmid: pcDNA5_RT-PC-EGFP-SNX2                           | kind gift from A. Gautreau (Institut Polytechnique De Paris, France), (Helfer <i>et al.</i> , 2013) | N/A   |
| Plasmid: pcDNA5_EGFP-WASH                                 | (Derivery <i>et al.</i> , 2009)                                                                     | N/A   |
| Plasmid: pcCM3H1p YFP WASH wild type                      | kind gift from D. Billadeau (Mayo Clinic, Rochester, USA), (Gomez and Billadeau, 2009)              | N/A   |

|                                 |                                                                                                                                |                                      |
|---------------------------------|--------------------------------------------------------------------------------------------------------------------------------|--------------------------------------|
| Plasmid: pCMS3H1p YFP WASH dWCA | kind gift from D. Billadeau (Mayo Clinic, Rochester, USA), (Gomez and Billadeau, 2009)                                         | N/A                                  |
| Plasmid: p16SheLL               | kind gift from C. Buck (NIH, Bethesda, USA) (Buck <i>et al.</i> , 2005)                                                        | N/A                                  |
| <b>Software and Algorithms</b>  |                                                                                                                                |                                      |
| Adobe Illustrator               | Adobe Inc.                                                                                                                     | version 16.0.4                       |
| Adobe Photoshop                 | Adobe Inc.                                                                                                                     | C4, extended version 11.0            |
| Affinity Designer               | Serif (Europe) Ltd                                                                                                             | version 1.7.3                        |
| ApE – A plasmid Editor          | M. Wayne Davis ( <a href="https://jorgensen.biology.utah.edu/wayned/ape/">https://jorgensen.biology.utah.edu/wayned/ape/</a> ) | version 1.11                         |
| BD CellQuest Pro                | Becton Dickinson                                                                                                               | version 5.2                          |
| CellProfiler                    | (Kamentsky <i>et al.</i> , 2011)                                                                                               | version 2.1.1                        |
| CellSens Dimension              | Olympus                                                                                                                        | version 2.3                          |
| FACSDiva                        | Becton Dickinson                                                                                                               | version 6.1                          |
| Fiji (ImageJ)                   | (Schindelin <i>et al.</i> , 2012)                                                                                              | versions 2.0.0/1.50g and 2.1.0/1.53c |
| FlowJo                          | Becton Dickinson                                                                                                               | versions 8.8.6 and 10.6.1            |
| guavaSoft                       | Merck                                                                                                                          | version 3.1.1                        |
| iTEMFEI                         | FEI/Olympus                                                                                                                    | version 5.2                          |
| MATLAB                          | MathWorks                                                                                                                      | version R2015a, 8.5.0.197613         |
| MATLAB InfectionCounter Program | (Snijder <i>et al.</i> , 2012)                                                                                                 | version blue, release B3             |
| Metamorph (Spinning disk)       | Molecular Devices                                                                                                              | version 7.7.2                        |
| Metamorph (IX71 TIRF)           | Molecular Devices                                                                                                              | version 7.7.1                        |
| Microsoft Excel                 | Microsoft Corporation                                                                                                          | versions 15.41.0 and 16.40           |
| Prism                           | GraphPad Software, Inc.                                                                                                        | version 6.0f                         |
| SnapGene Viewer                 | SnapGene                                                                                                                       | version 2.6.2                        |
| Tecnai software                 | FEI/Thermo Fisher Scientific                                                                                                   | version 3.1.3                        |
| Volocity software               | PerkinElmer                                                                                                                    | version 6.3                          |

721

## 722 RESOURCE AVAILABILITY

### 723 Lead Contact

724 Further information and requests for resources should be directed and will be fulfilled

725 by the lead contact, Mario Schelhaas ([schelhaas@uni-muenster.de](mailto:schelhaas@uni-muenster.de)).

726

727

728

729

730 **Materials Availability**

731 Plasmids generated in this study are available from the lead contact. WASH knock  
732 out cell lines described in this study are available from Theresia Stradal  
733 ([Theresia.Stradal@helmholtz-hzi.de](mailto:Theresia.Stradal@helmholtz-hzi.de)) with a completed Material Transfer Agreement.

734

735 **Data and Code Availability**

736 All data reported in this paper will be shared by the lead contact upon request. The  
737 paper does not report original code. Any additional information required to reanalyze  
738 the data reported in this paper is available from the lead contact upon request.

739

740 **EXPERIMENTAL MODEL AND SUBJECT DETAILS**

741 **Cell lines**

742 HeLa ATCC, HeLa Kyoto (both female origin), HaCaT cells (male origin) and non-  
743 human, primate Vero cells (female origin) were cultured in high glucose Dulbecco's  
744 modified eagle medium (DMEM, D5796 Sigma-Aldrich) supplemented with 10% fetal  
745 bovine serum (FBS). 293TT cells (female origin) were grown in DMEM with 10% FBS  
746 and 400 µg/µl hygromycin B. U2OS wild type and WASH KO cells (female origin) as  
747 well as murine NIH 3T3 wild type and WASH KO cells (male origin) were cultured in  
748 DMEM supplemented with 10% FBS and 1% non-essential amino acids (NEAA).  
749 Primate, non-human BSC-40 cells (sex unspecified) were grown in DMEM  
750 supplemented with 10% FBS, 5% NEAA and 5% sodium pyruvate. Hamster BHK-21  
751 cells (male origin) were cultured in Glasgow's minimum essential medium (GMEM)  
752 supplemented with 10% FBS. All cells were cultivated in a humidified atmosphere at  
753 37°C and 5% CO<sub>2</sub> and routinely tested for mycoplasma contamination.

754

755

756 **Bacteria strains**

757 Chemocompetent *E. coli* DH5a used for plasmid preparation were grown in lysogeny  
758 broth (LB) medium supplemented with antibiotics at 37°C and 210 rpm.

759

760 **Virus strains**

761 VV-GFP (Western Reserve) containing a fluorescent version of the core protein A5  
762 was propagated and titrated on BSC-40 cells in standard growth medium and purified  
763 as described previously (Mercer and Helenius, 2008). HSV-1-EGFP (17syn+)  
764 expressing EGFP under control of the cytomegalovirus promoter was propagated on  
765 BHK-21 cells and titrated on Vero cells, both grown in GMEM supplemented with 2%  
766 FBS, as described previously (Schelhaas *et al.*, 2003; Hafezi *et al.*, 2012). SFV  
767 (prototype strain) was propagated and titrated on BHK-21-Helsinki cells as previously  
768 described (Marsh, Kielian and Helenius, 1984). Infection was carried out in GMEM  
769 supplemented with 10% FBS and 10% Tryptose Broth. VSV-GFP (Indiana)  
770 expressing an additional transgene encoding GFP was propagated on BHK-21-  
771 Helsinki cells grown in GMEM supplemented with 10 mM HEPES (pH 6.5). At 1 h  
772 p.i., GMEM supplemented with 30 mM HEPES (pH 7.3) and 10% Tryptose  
773 Phosphate Broth and 1% FBS was added, as previously described (Johannsdottir *et*  
774 *al.*, 2009). The virus was titrated on BHK-21-Helsinki cells grown in RPMI  
775 supplemented with 30 mM HEPES (pH 6.5). HPV16 PsVs were produced as  
776 described in the method details.

777

778 **METHOD DETAILS**

779 **Cloning and plasmid purification**

780 *Cloning of HA-CD151 construct*

781 Lentiviral expression constructs of HA-tagged CD151 were a kind gift from M. Hemler  
782 (Dana Farber Cancer Institute and Harvard Medical School, Boston, USA) (Hwang,  
783 Takimoto and Hemler, 2019). For subcloning, HA-CD151 was cut from the lentiviral  
784 vector using *EcoRI* and *XbaI* for 2 h at 37°C. A pcDNA3 expression vector was cut  
785 using the same enzymes and conditions. For purification, both samples were run on  
786 a 2% acrylamide gel. The DNA was visualized with ethidium bromide and bands  
787 representing the cut pcDNA3 backbone as well as HA-CD151 (insert) were isolated  
788 from the gel. Gel extraction was performed with a NucleoSpin Gel and PCR Clean-up  
789 kit (Macherey-Nagel). DNA concentrations were determined with help of a 1.5%  
790 agarose gel by comparison to the marker bands (Gene Ruler 1 kb DNA ladder,  
791 Thermo Scientific). Insert and backbone were ligated by incubation with the T4 ligase  
792 overnight at 16°C.

793

#### 794 *Plasmid purification*

795 Chemocompetent *E. coli* DH5a were incubated with 5 µl ligation product for 10 min  
796 on ice. Heat shock was performed by 60-90 sec incubation at 42°C. Immediately  
797 afterwards, bacteria were incubated on ice for 5 min before LB medium was added.  
798 Bacteria were grown at 37°C and 350 rpm for 30-60 min and plated on LB agar  
799 plates with antibiotics using inoculation loops. Plates were incubated overnight at  
800 37°C and inspected for colony growth the next day. For HA-CD151 cloning, several  
801 overnight cultures with LB supplemented with antibiotics were inoculated with one  
802 colony each. Plasmids were purified using the NucleoSpin Plasmid kit (Macherey-  
803 Nagel) and sent for sequencing by Eurofins Genomics (Luxembourg). Sequence  
804 analysis was performed with ApE. For use in experiments, plasmids were purified  
805 using the NucleoBond Xtra Maxi kit (Macherey-Nagel).

806

807

808

809 *sgRNA design and cloning*

810 sgRNAs were provided by a CRISPR design tool (CRIPR.mit.edu or CCTop).  
811 Specifically, the murine gene was disrupted by sgRNAs targeting exon 2 and the  
812 human gene by simultaneously targeting exons 4 and 5 (key resources table). Top  
813 and bottom strands of sgRNAs were annealed using T4 ligase for 30 min at 37°C and  
814 cloned into pSpCas9(BB)-2A-GFP (pX458) by digestion with *BbsI* and ligation with  
815 T4 ligase (6 cycles: 37°C for 5 min, 21°C for 5 min). Residual linearized DNA was  
816 removed by treatment with PlasmidSafe exonuclease at 37°C for 30 min. Chemically  
817 competent *E.coli* DH5a were transformed with the ligation product as described  
818 above.

819

## 820 **Generation and characterization of WASH KO cell lines with CRISPR/Cas9**

821 NIH-3T3 and U2OS cells were plated in 6-well plates and maintained in DMEM  
822 (4.5 g/L glucose, Invitrogen, Germany) supplemented with 10% (v/v) FBS (Sigma,  
823 Germany), 1 mM sodium pyruvate, 1x non-essential amino acids and 2 mM L-  
824 glutamine at 37°C in a humidified 7.5% CO<sub>2</sub>-atmosphere overnight. Cells were  
825 genome edited using the CRISPR/Cas9 technology (Ran *et al.*, 2013) to generate  
826 WASH KO cell lines. Selected sgRNAs (key resources table) were cloned into pX458  
827 allowing simultaneous expression of sgRNA, Cas9 and selection via EGFP  
828 expression as described above. The resulting constructs were transfected into NIH-  
829 3T3 or U2OS cells, respectively. Plasmids (1 µg) and X-tremeGene™ 9 (3 µl) were  
830 diluted in 100 µl optiMEM, incubated for 30 min at room temperature and added to  
831 cells for 16-24 h. Transfection efficiency was monitored using an EVOS® FL Cell  
832 Imaging System (Thermo Fisher, Germany). Cells were grown to confluence and

833 subsequently single, GFP-positive cells were sorted into 96-well plates by flow  
834 cytometry using a FACSAria II instrument (BD Biosciences) and FACSDiva software.  
835 Sorted cells were maintained in growth medium supplemented with penicillin (50  
836 Units/ml)/streptomycin (50 mg/ml) (Thermo Fisher Scientific) and containing 30%  
837 conditioned medium and 10  $\mu$ M ROCK inhibitor (BD Biosciences). After  
838 approximately 10 days, clones were picked from single wells and expanded. Derived  
839 cell clones were screened for the absence of WASH expression by Western blotting  
840 and NIH-3T3 clones lacking detectable amounts of WASH were subjected to  
841 genomic sequencing as described (Kage *et al.*, 2017). Cells from confluent 6 cm  
842 dishes were trypsinized, pelleted and lysed by overnight incubation in lysis buffer  
843 (100 mM Tris pH 8.5, 5 mM EDTA, 0.2% SDS, 200 mM NaCl, 20 mg/ml proteinase  
844 K) at 55°C. Nucleic acid extraction was performed by ethanol precipitation. Addition  
845 of 700  $\mu$ l 100% ice cold ethanol was followed by centrifugation at 16,000 x g at 4°C  
846 for 30 min. The pellet was washed with 400  $\mu$ l 70% ice-cold ethanol and samples  
847 were dried at 45°C for 20 min. DNA was dissolved in 100  $\mu$ l deionized water at 4°C  
848 overnight and served as template in PCR using GoTaq G2 flexi DNA polymerase.  
849 The selected primer pair (key resources table) revealed a PCR product of 330 base  
850 pairs. PCR products were examined on 2% agarose gels and appropriate samples  
851 purified with a NucleoSpin Gel and PCR clean-up kit (Macherey-Nagel). DNA  
852 fragments were cloned into a zero blunt TOPO vector (Zero Blunt TOPO Cloning Kit  
853 for Sequencing, Invitrogen) for 5 min at room temperature. After transformation as  
854 above, single bacterial colonies were inoculated overnight and plasmid DNA purified  
855 using NucleoSpin Plasmid kit (Macherey-Nagel). Sequencing of isolated plasmid  
856 DNA was carried out by MWG-Biotech using a standard M13r sequencing primer  
857 (key resources table). Clones were examined for frameshift mutations and mono- or  
858 biallelic deletions/insertions using SnapGene Viewer software. Mutations or deletions

859 generating stop codons shortly downstream of the target site were defined as 'null'  
860 alleles. Cell populations exclusively harboring such alleles out of more than 50  
861 sequencing reactions were selected for further analyses. For WASH targeted clones  
862 of murine NIH-3T3 cells, three clones were identified that did not display a wild type  
863 allele in more than ten sequencing reactions. All clones showed similar effects on  
864 HPV16 infection, thus only one clone is shown in this study. For WASH targeted  
865 clones of human U2OS cells no clear sequencing result was obtained probably due  
866 to pseudogenes being targeted by sequencing primers.

867

### 868 **Western blotting**

869 For analysis of protein amounts after siRNA treatment or CRISPR/Cas9 mediated  
870 KO, lysates were prepared in 2x sample buffer (4% SDS, 20% glycerol, 0.01%  
871 bromophenol blue, 100 mM Tris HCl (pH 6.8), 200 mM DTT). Samples were  
872 denatured for 5 min at 95°C and loaded on polyacrylamide gels. For stacking gels,  
873 5% polyacrylamide was used and separating cells were 6 or 8% for JMY and  
874 WHAMM, respectively. All other proteins were separated on 10% gels.  
875 Electrophoresis was performed in Laemmli running buffer (0.1% SDS, 25 mM Tris,  
876 192 mM glycine). Proteins were transferred from gels to nitrocellulose membranes for  
877 50 min at 400 mA in pre-cooled transfer buffer (192 mM glycine, 25 mM Tris, 10%  
878 methanol). After transfer, membranes were blocked in 5% milk powder (MP) in Tris-  
879 buffered saline (TBS) supplemented with 0.2% Tween 20 (TBS-TMP) or in 0.2-3%  
880 bovine serum albumin (BSA) for at least 30 min. Primary antibodies were diluted in  
881 TBS-TMP or BSA and membranes were incubated for 2 h at room temperature or  
882 overnight at 4°C. Three washes with TBS supplemented with Tween 20 (TBS-T)  
883 were followed by incubation with anti-mouse or -rabbit secondary antibodies  
884 conjugated to HRP diluted in TBS-TMP or BSA. Membranes were washed twice with



885 TBS-T and once with TBS before the signal from HRP-conjugated antibodies was  
886 revealed using enhanced chemiluminescence (ECL) or ECL prime and photographic  
887 films.

888

889

## 890 **Virus production**

### 891 *Production of HPV16 PsVs*

892 PsV production was performed as previously described (Buck *et al.*, 2005). A total of  
893  $1.8 \times 10^7$  293TT cells were seeded in 145 mm cell culture dishes. The next day, cells  
894 were co-transfected with p16sheLL and the reporter plasmid pCIneoEGFP (GFP) or  
895 pRwB (RFP). Both plasmids (30  $\mu$ g each) as well as Lipofectamine 2000 (132.5  $\mu$ l)  
896 were diluted in optiMEM and incubated for 5 min at room temperature. The DNA  
897 dilution was added to the Lipofectamine 2000 dilution and samples were incubated  
898 for 20 min at room temperature before the transfection mix was added to fresh  
899 growth medium in the dishes. At 48 h post transfection, cells were harvested and  
900 pelleted. For cell lysis and virus maturation, the pellet was incubated with 0.35% Brij  
901 58, 0.2% Plasmid Safe DNase and 0.2% benzonase for 24 h at 37°C on an overhead  
902 rotator. PsVs were purified using a linear 25%-39% OptiPrep density gradient. A PsV  
903 fraction at around 30% OptiPrep was collected with a needle and analyzed for virus  
904 content and purity by Coomassie staining of SDS-PAGE gels.

905

### 906 *Labeling of HPV16 PsVs*

907 HPV16 PsVs were incubated with Alexa Fluor 488, 568, 594 or 647 succinimidyl  
908 ester in virion buffer (635 mM NaCl, 0.9 mM CaCl<sub>2</sub>, 0.5 mM MgCl<sub>2</sub>, 2.1 mM KCl in  
909 PBS, pH 7.6) using a 1:8 molar ratio of L1 to the dye for 1 h on an overhead rotator  
910 (Schelhaas *et al.*, 2008; Ventayol and Schelhaas, 2015). Free dye was removed by

911 ultracentrifugation using a 15-25-39% OptiPrep step gradient. The labeled virus  
912 between the 25% and 39% OptiPrep fraction was collected with a needle. The PsV  
913 concentration was determined by SDS-PAGE and subsequent Coomassie staining.  
914 The labeled virus was characterized by binding to glass coverslips and HeLa ATCC  
915 cells (Ventayol and Schelhaas, 2015). Labeling of PsVs with pHrodo was achieved  
916 following the same protocol. Virus characterization was performed in citric acid buffer  
917 (pH 4.4) (Ventayol and Schelhaas, 2015).

918

## 919 **Infection experiments**

### 920 *Infection of KO cells*

921 NIH-3T3 ( $4 \times 10^5$  cells/well) and U2OS (both  $5 \times 10^4$  cells/well) wild type and WASH  
922 KO cells were seeded in 12-well plates. The next day, the growth medium was  
923 replaced with 300  $\mu$ l fresh growth medium and HPV16-GFP was added to result in  
924 20% infection in wild type cells. The virus was bound on a shaker at 37°C. At 2 h p.i.,  
925 the inoculum was replaced by fresh growth medium and infection was continued. At  
926 48 h p.i., cells were trypsinized and fixed in 4% PFA for 15 min at room temperature.  
927 Cells were resuspended in FACS buffer (250 mM EDTA, 2% FBS, 0.02% NaN<sub>3</sub> in  
928 PBS) and analyzed for infection (percentage of GFP positive cells) by flow cytometry  
929 (FACSCalibur, Becton Dickinson). Gating of infected cells was done with help of  
930 uninfected controls. The percentage of infected cells was normalized to the  
931 respective wild type cells using Microsoft Excel.

932

### 933 *Inhibitor studies*

934 HeLa ATCC cells were seeded in 12-well plates ( $5 \times 10^4$  cells/well) about 16 h prior  
935 to experimentation. Retro-2 experiments were done with HeLa Kyoto cells ( $1 \times 10^5$   
936 cells/well). For HPV16 and HSV-1 infection experiments, small compound inhibitors

937 and solvent controls were diluted in growth medium, while they were diluted in  
938 infection medium (RPMI supplemented with 30 mM HEPES, pH 6.5) for VSV  
939 infection. Cells were pre-treated with inhibitors or solvent controls for 30 min at  
940 indicated concentrations and infected with HPV16-GFP as described above. The  
941 inoculum was replaced at 2 h p.i. and infection was continued in presence of the  
942 inhibitor. At 12 h p.i., inhibitors were exchanged for 10 mM NH<sub>4</sub>Cl/10 mM HEPES in  
943 growth medium to reduce cytotoxicity (Schelhaas *et al.*, 2012). Cells were fixed and  
944 processed for flow cytometry analysis as described above. For infection with VSV-  
945 GFP, the virus was added to the infection medium +/- inhibitor to result in 20%  
946 infection in solvent treated controls. VSV-GFP was bound for 2 h on a shaker at 37°C  
947 until the inoculum was replaced with 1 ml growth medium. Cells were trypsinized and  
948 fixed at 6 h p.i. as described for HPV16. HSV-1 infection was carried out in growth  
949 medium containing the inhibitor or the solvent control. The virus was bound at 4°C for  
950 1 h, the medium was exchanged for fresh, warm medium with inhibitors and infection  
951 was continued for 5 h at 37°C. Cells were fixed at 6 h p.i. as described before.

952

953 To investigate additional effects of retro-2 treatment on HPV16 trafficking, the virus  
954 was accumulated in the endolysosomal system by treatment with 10 mM NH<sub>4</sub>Cl for  
955 the first 12 h of infection (Schelhaas *et al.*, 2012). Then, the inhibitors were replaced  
956 by 50/100 µM retro-2 and cells were fixed at 48 h p.i. as described above. All  
957 samples were analyzed for infection (percentage of GFP positive cells) by flow  
958 cytometry (FACSCalibur, Becton Dickinson). Gating of infected cells was done with  
959 help of solvent treated controls to which the percentage of infected cells was  
960 normalized.

961

962 *Infection studies after siRNA-mediated depletion*

963 For siRNA-mediated knockdown,  $2 \times 10^3$  or  $2 \times 10^4$  HeLa Kyoto cells were reverse  
964 transfected in 96-well optical bottom plates or 12-well plates, respectively.  
965 Transfection was performed using 0.2  $\mu$ l (96-well) or 0.5  $\mu$ l (12-well) Lipofectamine  
966 RNAi max per well diluted in optiMEM and siRNAs were diluted in optiMEM to reach  
967 the working concentration indicated in supplemental table 1. The following procedure  
968 and incubation times were as for Lipofectamine 2000. Besides the siRNA against the  
969 cellular proteins of interest, the AllStars negative siRNA (ctrl.) was included as a non-  
970 targeting control, whereas the AllStars death siRNA was used to test for successful  
971 transfection. Moreover, an siRNA targeting GFP was included to suppress the  
972 expression of the HPV16-GFP reporter plasmid as a measure for maximal reduction  
973 of infection. For RNAi against WASH, cells were transfected twice in 48 h intervals.  
974 Cells were infected with HPV16-GFP at 48 h post transfection to result in 20%  
975 infection in ctrl. negative transfected controls. In 12-well plates, infection was  
976 performed and analyzed by flow cytometry as described above. Absolute infection  
977 values were normalized to ctrl. transfected controls. In 96-well plates, the virus was  
978 added without prior medium exchange to reduce cell loss. At 48 h p.i., cells were  
979 fixed in 4% PFA in PBS and nuclei were stained with RedDot2 for 30 min after  
980 permeabilization with 0.1% Triton in PBS. Infection was analyzed by automated  
981 microscopy on a Zeiss Axiovert Z.1 microscope equipped with a Yokogawa CSU22  
982 spinning disk module (Visitron Systems). Images were acquired using a 20x  
983 objective, a CoolSnap HQ camera (Photometrics) and MetaMorph Software. Cell  
984 number and infection were determined using a MATLAB-based infection scoring  
985 procedure (Engel *et al.*, 2011). The program detects nuclei and infection signal  
986 individually, based on their limiting intensity edges. The edges were filled to objects,  
987 which were classified by size. Binary masks of nuclei and infection signal were  
988 created and cells were classified as infected if equal or greater than 5% of their

989 nuclei overlapped with infection signal above a certain threshold. In this study, signal  
990 twice above the background in the uninfected sample was considered infected. An  
991 infection index was obtained for each image and averaged per well (Snijder *et al.*,  
992 2012).

993

994 Infection with VV-GFP was carried out in 96-well plates following the same protocol  
995 as for HPV16 with the exception that  $3 \times 10^3$  cells were transfected. Virus amounts  
996 leading to 20% infection in ctrl. treated controls were used. Cells were fixed at 6 h p.i.  
997 and analyzed by automated microscopy, as described above.

998

999 For siRNA experiments with SFV,  $5 \times 10^4$  HeLa Kyoto cells were reverse transfected  
1000 in 12-well plates. Infection was performed by addition of the virus to infection medium  
1001 (RPMI supplemented with 10% FBS, 10 mM HEPES (pH 7.3)). The virus was bound  
1002 on a shaker at 37°C. At 2 h p.i., the inoculum was replaced by growth medium. Cells  
1003 were trypsinized and fixed at 6 h p.i.. Since SFV did not carry a fluorescent reporter  
1004 plasmid, samples were immunostained for SFV E1/E2 after fixation at 6 h p.i.. Cells  
1005 were permeabilized with FACS perm (250 mM EDTA, 2% FBS, 0.02% NaN<sub>3</sub>, 0.05%  
1006 Saponin in PBS) for 30 min at room temperature and subsequently incubated with  
1007 the Lady Di antiserum (Singh and Helenius, 1992) diluted in FACS perm for 2 h at  
1008 room temperature. Samples were washed thrice with FACS perm and incubated with  
1009 an anti-rabbit AF488 secondary antibody in FACS perm for 1 h at room temperature.  
1010 Washing with FACS perm was followed by infection scoring with FACS analysis  
1011 (FACSCalibur, Becton Dickinson) as described for HPV16. Infection values were  
1012 normalized to ctrl. using Microsoft Excel.

1013

1014 *Infection studies in transiently transfected cells*

1015 NIH-3T3 wild type and WASH KO cells were seeded in 12-well plates  
1016 ( $4 \times 10^4$  cells/well). One day later, cells were transfected with plasmids (1  $\mu$ g)  
1017 encoding EGFP-WASH or EGFP, YFP-WASH or YFP-WASH dWCA using  
1018 Lipofectamine 2000 (0.5  $\mu$ l/well) diluted in optiMEM. Incubation times were the same  
1019 as for virus preparation. At about 16 h post transfection, cells were infected with  
1020 HPV16-RFP as described above to result in 20% infection in control cells transfected  
1021 with GFP. Cells were trypsinized at 48 h p.i., fixed in 4% PFA in PBS and analyzed  
1022 by flow cytometry (Guava easyCyte, Merck). Final analysis was performed with  
1023 FlowJo. Transfected cells were gated with help of untransfected controls. Then, the  
1024 GFP positive population was gated for infection using transfected, but uninfected  
1025 controls. The percentage of transfected and infected cells (GFP and RFP positive)  
1026 was normalized to NIH-3T3 wild type cells transfected with the GFP control to obtain  
1027 relative infection values using Microsoft Excel.

1028

1029 HeLa ATCC cells were transfected with Scar-W and -WA constructs as described  
1030 above 16-24 h prior to infection. Cells were infected with HPV16-RFP and fixed 48 h  
1031 p.i. using 4% PFA. Infection was scored using an Olympus IX70 inverted microscope  
1032 equipped with an electron multiplier CCD camera (EDMCCD, C9100-02, Hamamatsu  
1033 Photonics K. K.) and a monochromator for epifluorescence excitation. Images were  
1034 thresholded manually and at least 100 cells were scored for transfection and infection  
1035 using Fiji.

1036

### 1037 *HPV16 binding assay*

1038 For analysis of HPV16 binding by flow cytometry,  $5 \times 10^4$  NIH-3T3 wild type and  
1039 WASH KO cells were seeded per well of a 12-well plate. The next day, fluorescently  
1040 labeled HPV16-AF488 (~1000 particles/cell) was bound to the cells for 2 h on a

1041 shaker at 37°C. Cells treated with siRNAs were reseeded at 48 h post transfection (5  
1042  $\times 10^4$  cells/well). Virus binding was performed once cells were attached, typically  
1043 about 6 h post seeding. As a non-binding control, HPV16-AF488 was pre-incubated  
1044 with 1 mg/ml heparin for 1 h at room temperature prior to binding to cells (Cerqueira  
1045 *et al.*, 2013). Cells were trypsinized and fixed with 4% PFA. Virus binding was  
1046 analyzed by measuring the mean fluorescence intensity (geometric mean) of cells in  
1047 flow cytometry (FACSCalibur). The geometric mean of uninfected cells was  
1048 subtracted from infected cells and virus binding was normalized to control cells. A  
1049 similar procedure was applied to measure virus binding to HeLa Kyoto cells depleted  
1050 of SNX2. Binding was qualitatively assessed for NIH-3T3 wild type and WASH KO  
1051 cells as well as after SNX2 KD in HeLa Kyoto cells. For this, HPV16-AF568 was  
1052 bound to these cells as described above. At 2 h p.i., cells were fixed with 4% PFA  
1053 and stained with 0.1  $\mu\text{g/ml}$  phalloidin-Atto488 diluted in PHEM buffer (60 mM PIPES,  
1054 10 mM EGTA, 2 mM  $\text{MgCl}_2$ , 25 mM HEPES, pH 6.9) supplemented with 0.01% Triton  
1055 X-100 for 30 min. Cells were washed thrice with PBS and mounted on glass slides  
1056 using AF1 mounting medium. Images were acquired with a Zeiss Axiovert Z.1  
1057 microscope equipped with a Yokogawa CSU22 spinning disk module (Visitron  
1058 Systems) using a 40x objective, a CoolSnap HQ camera (Photometrics) and  
1059 MetaMorph Software. Z-stacks covering the cell volume were converted to maximum  
1060 intensity projections using Fiji. Brightness and contrast were adjusted using  
1061 uninfected samples.

1062

1063 For microscopy-based analysis of retro-2 treated cells, HeLa Kyoto cells were  
1064 seeded to confluency in a 96-well plate. At least 6 h post seeding, HPV16-AF594 or -  
1065 AF488 (~1000 particles/cell) were bound to cells in presence or absence of the  
1066 inhibitor, as above. At 2 h p.i., cells were fixed with 4% PFA and binding was

1067 analyzed using a 40x objective of a spinning disk confocal microscope described  
1068 above. Z-stacks covering the cell volume were converted to sum intensity z-  
1069 projections using Fiji. The mean fluorescence intensities of HPV16 AF were  
1070 measured as arbitrary units per field of view. Background intensities measured in  
1071 uninfected samples were subtracted from raw intensities, which were normalized to  
1072 solvent treated control cells.

1073

1074

1075

#### 1076 *Infectious internalization assay*

1077 One day prior to infection,  $5 \times 10^4$  HeLa Kyoto cells were seeded per well of a 12-well  
1078 plate. Cells were pre-incubated with inhibitors and infected with HPV16-GFP as  
1079 described above. At 12 h p.i., extracellular virus was inactivated by washing with 1 ml  
1080 0.1 mM CAPS buffer (pH 10.5) for 90 sec (Schelhaas *et al.*, 2012; Becker *et al.*,  
1081 2018). The cells were washed twice with PBS to remove CAPS and infection was  
1082 continued in fresh growth medium. To control for inhibitor reversibility, the inhibitor  
1083 was washed out thrice with PBS without prior CAPS treatment and fresh growth  
1084 medium was added. At 48 h p.i., cells were fixed and infection was scored by flow  
1085 cytometry as described above. Infection results were normalized to inhibitor  
1086 reversibility.

1087

#### 1088 *Endocytosis assay with HPV16-pHrodo*

1089 Cells were reverse transfected with siRNAs as described above. At 48 h after the first  
1090 (Arp3, SNX2) or second (WASH) siRNA transfection, HPV16-pHrodo (~1000  
1091 particles/cell) was added to 350  $\mu$ l growth medium and bound for 2 h on a shaker.  
1092 The inoculum was replaced at 2 h p.i. and cells were imaged live at 6 h p.i. at 37°C



1093 and 5% CO<sub>2</sub> in humidified atmosphere using custom made imaging chambers and  
1094 DMEM high glucose without phenol red supplemented with 10% FBS, 1% L-  
1095 glutamine and 1% penicillin/streptomycin. Images were acquired on a Zeiss Axiovert  
1096 Z.1 microscope equipped with a Yokogawa CSU22 spinning disk module (Visitron  
1097 Systems) using a 40x objective, a CoolSnap HQ camera (Photometrics) and  
1098 MetaMorph Software. Average intensity projections of confocal slices were generated  
1099 using Fiji software. Intensity based analysis was performed with CellProfiler (Becker  
1100 *et al.*, 2018). In brief, the virus signal was enhanced by application of a white top-hat  
1101 filter. Virus spots were segmented by application of a gaussian filter and maximum  
1102 correlation thresholding. Virus intensity was then measured in enhanced and original  
1103 images. Pivot tables (Microsoft Excel) were used to summarize the intensity of spots  
1104 per condition. These values were normalized to the cell number, which was  
1105 determined by manual counting from brightfield images. The virus intensity per cell  
1106 was then normalized to ctrl. treated controls to obtain relative internalization values.  
1107 Cell outlines were created manually for presentation purposes.

1108

## 1109 **Electron microscopy and CLEM**

### 1110 *CLEM*

1111 A circular mark used for localization of unroofed cells was generated in the center of  
1112 coverslips (22 mm diameter) using a diamond knife. For ECM production, 2 x 10<sup>6</sup>  
1113 HaCaT cells were seeded onto the coverslips placed in a 6-well plate. At 48 h post  
1114 seeding, ECM was obtained by detaching cells through incubation with 10 mM  
1115 EDTA/EGTA for 45 min at 37°C, subsequent clapping of the plate and washes with  
1116 PBS (Culp *et al.*, 2006). HPV16-AF568 was bound to the ECM in 1 ml growth  
1117 medium/well for 2 h on a shaker at 37°C. HaCaT cells were trypsinized and 12 x 10<sup>5</sup>  
1118 cells/well were seeded onto the virus bound to ECM. At 1 h post seeding, 10 µg/ml

1119 cytoD or DMSO (solvent control) were added. A total of 6 h post seeding, cells were  
1120 put on ice and washed thrice with cold stabilization buffer (70 mM KCl, 30 mM  
1121 HEPES (pH 7.4 with KOH), 5 mM MgCl<sub>2</sub>). For unroofing, the cells were kept on ice  
1122 and 1 ml cold 2% PFA in stabilization buffer was aspirated with a 1 ml pipette. The  
1123 pipette was positioned above the marked area in the center of the coverslip and PFA  
1124 was harshly released onto the cells. The coverslip was then rapidly transferred to a  
1125 new well containing cold 2% PFA in stabilization buffer to avoid sedimentation of cell  
1126 debris on the unroofed membrane. Membrane sheets were fixed for 10 min at 4°C.  
1127 Samples were mounted in custom-made imaging chambers and imaged in PBS at a  
1128 Nikon Ti Eclipse microscope equipped with a PerkinElmer UltraVIEW VoX spinning  
1129 disk module. Images were acquired using a 60x objective, an Orca Flash 4 camera  
1130 (Hamamatsu) and Volocity software (PerkinElmer, version 6.3). Montages of 10 x 10  
1131 images and 10% overlap were acquired around the center of the marked area. The  
1132 unroofed membranes were prepared for EM by fixation with 2% glutaraldehyde (GA)  
1133 in PBS overnight at 4°C. After two washes with water, samples were incubated with  
1134 0.1% tannic acid for 20 min at room temperature and subsequently washed with  
1135 water. Contrasting was performed with 0.1% uranyl acetate (UAC) for 20 min at room  
1136 temperature. After three washes with water, samples were dehydrated with a series  
1137 of ethanol solutions (15%/30%/50%/70%/80%/90%/100%). Coverslips were  
1138 incubated with each solution for 5 min, incubation with 100% ethanol was repeated  
1139 thrice. Samples were dried using hexamethyldisilazane (HDMS). After 5 min  
1140 incubation at room temperature, fresh HDMS was added and samples were  
1141 incubated for further 30 min at room temperature. Coverslips were dried and coated  
1142 under vacuum using a Balzers BAF301 device (former Balzers AG, Liechtenstein). A  
1143 first layer of platinum was applied at an angle of 11°C while rotating. A second layer  
1144 of carbon was applied at an angle of 90° while rotating. Coverslips were cut to fit on

1145 EM grids before 5% hydrofluoric acid were used to separate the metal replica from  
1146 the glass. Replicas were extensively washed with water prior to transfer to glow  
1147 discharged, formvar coated EM grids. Replicas were imaged with a phase contrast  
1148 microscope for orientation. Intact membranes associated with virus particles were  
1149 manually selected based on overlays of images from fluorescence and phase  
1150 contrast microscopy and imaged at a TEM (Jeol JEM-1400, Jeol Ltd., Tokyo, Japan,  
1151 camera: TemCam F416; TVIPS, Gauting, Germany). Membrane sheets were imaged  
1152 using montages of 5 x 5 images and 15% overlap. Fluorescence and EM images  
1153 were initially overlaid manually using Photoshop, then the Fiji plugin Landmark  
1154 Correspondences (Saalfeld and Tomancák, 2008) was used for transformation of the  
1155 fluorescence image according to the EM image using three manually identified  
1156 landmarks. For analysis, HPV16 was identified manually based on the fluorescent  
1157 signal and classification was done by visual evaluation of associated structures in  
1158 TEM images. At total of 134 and 101 membrane associated virus particles in DMSO  
1159 (7 membranes) and cytoD (5 membranes) treated cells were analyzed, respectively.

1160

#### 1161 *Ultra-thin section EM*

1162 Samples for ultra-thin section EM were prepared and analyzed as described  
1163 previously (Bannach *et al.*, 2020). A total of  $1-2 \times 10^5$  NIH 3T3 wild type, WASH KO  
1164 and HeLa Kyoto cells or were seeded in 3 cm dishes. Two days post seeding, cells  
1165 were either pretreated with inhibitors for 30 min or were left untreated. Cells were  
1166 infected with 40  $\mu$ g HPV16 PsVs in 1 ml growth medium. At 6 h p.i., cells were fixed  
1167 in 2.5% GA in PBS (pH 7.2) for 10 min at room temperature. A second fixation was  
1168 performed with cold 2.5% GA at 4°C overnight. Cells were washed thrice with PBS,  
1169 post-fixed with 1% OsO<sub>4</sub> in ddH<sub>2</sub>O for 1 h and washed twice with ddH<sub>2</sub>O at room  
1170 temperature and at 4°C for 20 min, respectively. Block contrasting was performed

1171 with 0.5% UAC in ddH<sub>2</sub>O at 4°C overnight. Cells were washed thrice with ddH<sub>2</sub>O and  
1172 dehydrated using ascending graded alcohol series. Detaching and dehydrating with  
1173 propylene oxide were followed by incubation with propylene oxide and epoxy resin  
1174 (1:3, 1:1, 3:1) for 2 h each, before cells were incubated with pure epoxy resin for 3 h  
1175 and embedded in BEEM capsules. The resin was allowed to polymerize at 60°C for  
1176 three days before 60 nm ultra-thin sections were cut and counterstained with uranyl  
1177 acetate and lead. Samples were imaged at a 80 kV on a Tecnai 12 electron  
1178 microscope (FEI) using an Olympus Veleta 4k CCD camera or Dtabis imaging  
1179 plates. Images were contrast enhanced and cropped using Adobe Photoshop CS4.  
1180 The total number of endocytic pits per cell was determined for 31 and 43 cells in wild  
1181 type and WASH KO cells, respectively, in two independent experiments. Only  
1182 endocytic pits containing virus(es) were counted, since HPV16 pits are hardly  
1183 distinguishable from uncoated pits from other endocytic pathways without further  
1184 staining. Pit numbers were normalized to wild type cells.

1185

#### 1186 *Immunogold labeling*

1187 HeLa ATCC cells (2-3 x 10<sup>5</sup> cells) were seeded in 6 cm dishes. The next day, cells  
1188 were transfected with a plasmid encoding EGFP-WASH or EGFP-SNX2 (7 µg) using  
1189 Lipofectamine 2000 (3.5 µl) according to the manufacturer's instructions or left  
1190 untransfected. At 48 h post transfection, cells were infected with 80 µg HPV16 PsVs  
1191 and incubated for 6 h at 37°C until pre-fixation by addition of 4% formaldehyde in  
1192 0.1 M phosphate buffer (pH 7.2) to the culture medium (1:1 ratio) for 5 min. Then,  
1193 cells were fixed in 2% formaldehyde, and 0.2% GA in 0.1M phosphate buffer  
1194 (pH 7.2). Samples were processed for TEM as previously described (Humbel and  
1195 Stierhof, 2009). In brief, cells were quenched by incubation in 0.1% glycine in 0.1 M  
1196 PB (2 x 30 min), washed thrice in 0.1 M PB for 30 min and scraped with 1% gelatin.

1197 After centrifugation, the gelatin was replaced with 12% gelatin and cells were infused  
1198 at 37°C. Cells were cooled down on ice and the gelatin-cell pellet was cut into small  
1199 blocks that were infused with 2.3 M sucrose overnight at 4°C. The blocks were  
1200 mounted on specimen carriers and frozen in liquid nitrogen. Ultra-thin cryosections  
1201 were prepared according to Tokuyasu (Tokuyasu, 1980). In brief, ultra-thin  
1202 cryosections of 50 nm thickness were prepared with an EM UC6/FC6 ultramicrotome  
1203 (Leica Microsystems). Sections were collected in a sucrose-methylcellulose mixture  
1204 and stored on TEM grids at 4°C until further processing. Methylcellulose was melted  
1205 and sections were washed five times with 20 mM glycine in PBS. Quenching was  
1206 followed by blocking with 1% BSA for 3 min. Cells were then incubated with a GFP-  
1207 antibody for 30 min, washed 6 times with 0.1% BSA in PBS and incubated with  
1208 protein A gold 15 nm for 20 min. Sections were rinsed 10 times with PBS and re-fixed  
1209 in 1% GA in PBS (pH 7.2). For double labeling, the sections were quenched, blocked  
1210 and immunostained with an actin antibody as described above. Then sections were  
1211 incubated with a rabbit anti-mouse bridging antibody followed by 6 washes with 0.1%  
1212 BSA in PBS and incubated with protein A gold 10 nm (1:50). Sections were rinsed  
1213 10 times with PBS and re-fixed in 1% GA in PBS, pH 7.2. Sections were rinsed 10  
1214 times with ddH<sub>2</sub>O and contrasted with uranyl acetate for 6 min (pH 7). After one wash  
1215 with ddH<sub>2</sub>O, cells were embedded in an uranyl acetate-methylcellulose mixture (pH  
1216 4) for 10 min. After looping out with filter paper, sections were dried and images were  
1217 acquired as above.

1218

## 1219 **Fluorescence microscopy**

### 1220 *CLC and virus internalization analysis by live cell TIRF microscopy*

1221 HeLa ATCC cells were seeded on coverslips in 12-well plates (5 x 10<sup>4</sup> cells/well) one  
1222 day prior to transfection. Cells were transfected with plasmids encoding lifeact-EGFP,

1223 EGFP-WASH, EGFP-SNX2, mRFP-CLC or EGFP-Dyn2 as described above. For  
1224 internalization analysis, fluorescently labeled virus (HPV16-AF594/AF647) was  
1225 bound at 37°C at about 18 h post transfection. At 1 h p.i., coverslips were mounted in  
1226 custom-made imaging chambers. Cells were imaged at 37°C and 5% CO<sub>2</sub> in  
1227 humidified atmosphere in DMEM without phenol red supplemented with 10% FBS,  
1228 1% L-glutamine and 1% penicillin/streptomycin. Time lapse movies of cells  
1229 expressing lifeact-EGFP were acquired with a 60x TIRF-objective on an Olympus  
1230 IX70 microscope equipped with a TIRF condenser and an electron multiplier CCD  
1231 camera (EDMCCD, C9100-02, Hamamatsu Photonics K. K.) using MetaMorph  
1232 software (Molecular Devices) (Visitron Systems). All other time lapse movies were  
1233 acquired using a 100x TIRF-objective at an Olympus IX83 microscope equipped with  
1234 a four-line TIRF condenser and an EMCCD camera (iXon Ultra 888, Andor Oxford  
1235 Instruments) using CellSens Dimensions software (Olympus). Movies were acquired  
1236 with 0.5 Hz frame rate for 5 min. HPV16 entry events were identified manually and  
1237 the intensity of fluorescent proteins at virus entry sites was analyzed after rolling ball  
1238 background subtraction and filtering (mean intensity filter) with Fiji. Kymographs,  
1239 intensity profiles along a manually drawn line through the virus/clathrin signal over  
1240 time, were generated with Fiji after background subtraction and filtering. Intensity  
1241 profiles measured with Fiji using a circular region of interest, were processed by  
1242 min/max normalization and aligned by setting the half time of virus internalization to 0  
1243 s. Profiles were plotted with Microsoft Excel. Moving averages of signals are shown  
1244 as a trendline (period 4-20). The time points of recruitment onset, maximal signal or  
1245 signal loss were manually determined relative to the half time of internalization and  
1246 box plots were generated with GraphPad Prism. Cells co-transfected with CLC and  
1247 Dyn2 were analyzed the same way at about 16 h post transfection. Movies were  
1248 compressed to 20 fps and PNG.

1249

1250 *Proximity ligation assay*

1251 For ECM production on coverslips,  $5 \times 10^5$  HaCaT cells were seeded per well of a  
1252 12-well plate and cultivated at 37°C for 2 days. Additionally,  $7 \times 10^4$  HaCaT cells  
1253 were seeded per well and transfected the next day with a plasmid encoding HA-  
1254 CD151. The procedure was the same as for infection studies with transfected cells,  
1255 but 0.4 µg DNA and 1 µl Lipofectamine 2000 per well were used. ECM on coverslips  
1256 was obtained by detaching cells with 0.5 ml 10 mM EDTA/EGTA as described above.  
1257 HPV16-AF488 (~1000 particles/cell) was bound to the ECM in 400 µl growth medium  
1258 on a shaker at 37°C. At 2 h post binding, HaCaT cells expressing HA-CD151 were  
1259 trypsinized and transferred onto the virus bound to ECM. Cells were allowed to  
1260 attach for 5 h and fixed in 2% PFA in PBS for 10 min at 4°C. Cells were  
1261 permeabilized with 0.2% Brij 58 in PBS for 10 min at room temperature prior to  
1262 blocking in 1% BSA in PBS for 30 min at room temperature. Primary antibody  
1263 staining against HA (1:10,000) and WASH (1:500) was carried out in a wet chamber  
1264 overnight at 4°C. Next, cells were incubated with anti-mouse PLUS and anti-rabbit  
1265 MINUS Duolink PLA probes diluted 1:5 in 1% BSA in PBS for 1 h at 37°C in a  
1266 humidity chamber. Duolink In Situ Detection Reagents Red were used for further  
1267 sample processing. For ligation of PLA probes, 1.25 U ligase per sample were added  
1268 to the corresponding ligation buffer diluted in ddH<sub>2</sub>O. The cells were incubated in at  
1269 wet chamber for 30 min at 37°C followed by two washes with wash buffer B (2 min,  
1270 room temperature). Amplification was performed with 6.25 U polymerase and Duolink  
1271 Amplification Red (1:5) diluted in ddH<sub>2</sub>O in a wet chamber at 37°C for 100 min. Cells  
1272 were washed twice for 10 min with wash buffer B at room temperature followed by a  
1273 quick wash with 0.1x wash buffer B in ddH<sub>2</sub>O. As a counterstain, HA (CD151) was  
1274 detected with an anti-mouse AF647 antibody, which was diluted 1:2000 in 1% BSA in

1275 PBS. Samples were transferred to custom made imaging chambers. Images were  
1276 acquired with a 100x TIRF-objective at an Olympus IX83 microscope equipped with a  
1277 four-line TIRF condenser and an EMCCD camera (iXon Ultra 888, Andor Oxford  
1278 Instruments) using CellSens Dimension software (Olympus).

1279

#### 1280 **Quantification and statistical analysis**

1281 Information on data representation (mean  $\pm$  SEM) and n can be found in the figure  
1282 legends. Statistical significance was determined using unpaired t-tests conducted  
1283 with GraphPad Prism. A P-value below 0.05 ( $P < 0.05$ ) indicated a significant  
1284 difference, denoted by asterisks in the figures (\*  $P \leq 0.05$ , \*\*  $P \leq 0.01$ , \*\*\*  $P \leq 0.001$ ).  
1285 If not specifically indicated, differences were not significant.

1286



1287 **Supplemental movie legends**

1288 Supplemental movie 1 **Actin polymerization coincided with HPV16 internalization**

1289 (Related to Figure 2)

1290 HeLa ATCC cells transfected with lifeact-EGFP (actin, green) were infected with  
1291 HPV16-AF594 (HPV16, red) and imaged by live cell TIRF-M at 1 h p.i.. Movies were  
1292 acquired with 0.5 Hz frame rate for 5 min and processed by background subtraction  
1293 and mean filtering. Shown is the virus entry event characterized in Figure 2. Depicted  
1294 are 200 frames corresponding to 1:40 min real time at a compression rate of 20  
1295 frames per seconds (fps). The virus internalizing during the movie is highlighted by a  
1296 circle. Scale bar is 200 nm.

1297

1298 Supplemental movie 2 **Dynamin recruitment during CME resembled actin**  
1299 **dynamics during HPV16 endocytosis** (Related to Figure S1)

1300 HeLa ATCC cells co-transfected with mRFP-clathrin light chain (CLC, red) and  
1301 EGFP-dynamin 2 (Dyn2, green) were imaged by live cell TIRF-M. Movies, acquired  
1302 with 0.5 Hz frame rate for 5 min, were processed by background and mean filtering.  
1303 Shown are 1:40 min (200 frames) of the CME event characterized in Figure S1 at a  
1304 compression rate of 20 fps. The CLC of interest is marked by a circle. Scale bar is  
1305 200 nm.

1306

1307 Supplemental movie 3 **WASH co-internalized with HPV16** (Related to Figure 4)

1308 EGFP-WASH (WASH, green) was expressed in HeLa ATCC cells, which were  
1309 subsequently infected with HPV16-AF647 (HPV16, red). Movies were acquired by  
1310 live cell TIRF-M at 1 h p.i. for 5 min at 0.5 Hz frame rate. The virus entry event  
1311 highlighted by a circle was characterized in Figure 4. Shown are 1:14 min

1312 (150 frames) with a compression rate of 20 frames per second. The movie was  
1313 processed by background subtraction and mean filtering. Scale bar is 200 nm.

1314

1315 Supplemental movie 4 **SNX2 co-internalized with HPV16** (Related to Figure 6)

1316 HeLa ATCC cells were transfected with EGFP-SNX2 (SNX2, green) and infected

1317 with HPV16-AF647 (HPV16, red). Movies of live cells were acquired with 0.5 Hz

1318 frame rate for 5 min at a TIRF-M. An excerpt of 1:14 min (150 frames) compressed to

1319 20 frames per second is shown after background subtraction and mean filtering. The

1320 virus particle of interest is marked with a circle. Scale bar is 200 nm.

1321

1322 **Supplemental table 1 (siRNA)**

| siRNA                       | working concentration (nM) | Qiagen identifier |
|-----------------------------|----------------------------|-------------------|
| AllStars death              | 10                         | SI04381048        |
| AllStars negative (siCtrl.) | 10/20/50                   | SI03650318        |
| Arp3 siRNA_1                | 10                         | Hs_ACTR3_5        |
| Arp3 siRNA_2                | 10                         | Hs_ACTR3_8        |
| CtBP1 siRNA_1               | 10                         | Hs_CTBP1_5        |
| CtBP1 siRNA_2               | 10                         | Hs_CTBP1_6        |
| Formin 1 siRNA_1            | 10                         | Hs_FMN1_5         |
| Formin 1 siRNA_2            | 10                         | Hs_FMN1_6         |
| Formin 1 siRNA_3            | 10                         | Hs_FMN1_7         |
| Formin 2 siRNA_1            | 10                         | Hs_FMN2_12        |
| Formin 2 siRNA_2            | 10                         | Hs_FMN2_7         |
| Formin 2 siRNA_3            | 10                         | Hs_FMN2_9         |
| FNL2 siRNA_1                | 10                         | Hs_FMNL2_6        |
| FNL2 siRNA_2                | 10                         | Hs_FMNL2_7        |
| FNL2 siRNA_3                | 10                         | Hs_FMNL2_8        |
| FNL3 siRNA_1                | 10                         | Hs_FMNL3_1        |
| FNL3 siRNA_2                | 10                         | Hs_FMNL3_5        |
| FNL3 siRNA_3                | 10                         | Hs_FMNL3_6        |
| GFP siRNA                   | 10                         | SI04380467        |
| JMY siRNA_1                 | 50                         | Hs_JMY_1          |
| JMY siRNA_2                 | 50                         | Hs_JMY_5          |
| DIAPH2 siRNA_1              | 10                         | Hs_DIAPH2_1       |

|                |    |             |
|----------------|----|-------------|
| DIAPH2 siRNA_2 | 10 | Hs_DIAPH2_4 |
| DIAPH2 siRNA_3 | 10 | Hs_DIAPH2_6 |
| N-WASP siRNA_1 | 10 | Hs_WASL_1   |
| N-WASP siRNA_2 | 10 | Hs_WASL_6   |
| SNX2 siRNA_1   | 10 | Hs_SNX2_1   |
| SNX2 siRNA_2   | 10 | Hs_SNX2_3   |
| WASH siRNA_1   | 20 | Hs_WASH1_4  |
| WASH siRNA_2   | 20 | Hs_WASH1_8  |
| WAVE1 siRNA_1  | 20 | Hs_WASF1_3  |
| WAVE1 siRNA_2  | 50 | Hs_WASF1_4  |
| WAVE2 siRNA_1  | 10 | Hs_WASF2_5  |
| WAVE2 siRNA_2  | 10 | Hs_WASF2_6  |
| WHAMM siRNA_1  | 50 | Hs_WHDC1_1  |
| WHAMM siRNA_2  | 50 | Hs_WHDC1_2  |
| Vps26 siRNA_1  | 10 | Hs_VPS26A_1 |
| Vps26 siRNA_2  | 10 | Hs_VPS26A_2 |
| Vps29 siRNA_1  | 10 | Hs_VPS29_6  |
| Vps29 siRNA_2  | 10 | Hs_VPS29_2  |

1323

1324 **References**

- 1325 Aksoy, P., Gottschalk, E. Y. and Meneses, P. I. (2017) 'HPV entry into cells',  
1326 *Mutation Research - Reviews in Mutation Research*. Elsevier B.V., 772, pp. 13–22.  
1327 doi: 10.1016/j.mrrev.2016.09.004.
- 1328 Aydin, I. *et al.* (2014) 'Large scale RNAi reveals the requirement of nuclear envelope  
1329 breakdown for nuclear import of human papillomaviruses.', *PLoS pathogens*, 10(5),  
1330 p. e1004162. doi: 10.1371/journal.ppat.1004162.
- 1331 Bannach, C. *et al.* (2020) 'Epidermal growth factor receptor and Abl2 kinase regulate  
1332 distinct steps of Human papillomavirus type 16 endocytosis.', *Journal of virology*,  
1333 2(March). doi: 10.1128/JVI.02143-19.
- 1334 Becker, M. *et al.* (2018) 'Extracellular conformational changes in the capsid of human  
1335 papillomaviruses contribute to asynchronous uptake into host cells', *Journal of*  
1336 *Virology*, 92(11), p. JVI.02106-17. doi: 10.1128/jvi.02106-17.
- 1337 Bement, W. M., Sokac, A. M. and Mandato, C. A. (2003) 'Four-dimensional imaging  
1338 of cytoskeletal dynamics in *Xenopus* oocytes and eggs', *Differentiation*, 71(9–10), pp.  
1339 518–527. doi: 10.1111/j.1432-0436.2003.07109005.x.
- 1340 Bienkowska-Haba, M. *et al.* (2012) 'Cyclophilins facilitate dissociation of the human  
1341 papillomavirus type 16 capsid protein L1 from the L2/DNA complex following virus  
1342 entry.', *Journal of virology*, 86(18), pp. 9875–87. doi: 10.1128/JVI.00980-12.
- 1343 Borradori, L. and Sonnenberg, A. (1999) 'Structure and function of  
1344 hemidesmosomes: More than simple adhesion complexes', *Journal of Investigative*  
1345 *Dermatology*, 112(4), pp. 411–418. doi: 10.1046/j.1523-1747.1999.00546.x.
- 1346 Boukamp, P. *et al.* (1988) 'Normal keratinization in a spontaneously immortalized  
1347 aneuploid human keratinocyte cell line.', *The Journal of cell biology*, 106(3), pp. 761–  
1348 71. doi: 10.1083/jcb.106.3.761.
- 1349 Brockman, W. W. and Nathans, D. (1974) 'The isolation of simian virus 40 variants  
1350 with specifically altered genomes', *Proceedings of the National Academy of Sciences*  
1351 *of the United States of America*, 71(3), pp. 942–946. doi: 10.1073/pnas.71.3.942.
- 1352 Bucher, D. *et al.* (2018) 'Clathrin-Adaptor ratio and membrane tension regulate the  
1353 flat-to-curved transition of the clathrin coat during endocytosis', *Nature*  
1354 *Communications*, 9(1), pp. 1–13. doi: 10.1038/s41467-018-03533-0.
- 1355 Buck, C. B. *et al.* (2005) 'Generation of HPV pseudovirions using transfection and  
1356 their use in neutralization assays.', *Methods in molecular medicine*, 119, pp. 445–62.  
1357 doi: 10.1385/1-59259-982-6:445.

- 1358 Buck, C. B. and Thompson, C. D. (2007) 'Production of Papillomavirus-Based Gene  
1359 Transfer Vectors', *Current Protocols in Cell Biology*, 37(1), pp. 26.1.1-26.1.19. doi:  
1360 10.1002/0471143030.cb2601s37.
- 1361 Bujny, M. V *et al.* (2007) 'The retromer component sorting nexin-1 is required for  
1362 efficient retrograde transport of Shiga toxin from early endosome to the trans Golgi  
1363 network.', *Journal of cell science*, 120, pp. 2010–2021. doi: 10.1242/jcs.003111.
- 1364 Campellone, K. G. *et al.* (2008) 'WHAMM Is an Arp2/3 Complex Activator That Binds  
1365 Microtubules and Functions in ER to Golgi Transport', *Cell*, 134(1), pp. 148–161. doi:  
1366 10.1016/j.cell.2008.05.032.
- 1367 Cao, H., Garcia, F. and Mcniven, M. A. (1998) 'Differential Distribution of Dynamin  
1368 Isoforms in Mammalian Cells', *Molecular Biology of the Cell*, 9(September), pp.  
1369 2595–2609. doi: 10.1091/mbc.9.9.2595.
- 1370 Carlton, J. G. *et al.* (2005) 'Sorting nexin-2 is associated with tubular elements of the  
1371 early endosome, but is not essential for retromer-mediated endosome-to-TGN  
1372 transport.', *Journal of cell science*, 118(Pt 19), pp. 4527–39. doi: 10.1242/jcs.02568.
- 1373 Cerqueira, C. *et al.* (2013) 'Heparin increases the infectivity of Human Papillomavirus  
1374 Type 16 independent of cell surface proteoglycans and induces L1 epitope  
1375 exposure', *Cellular Microbiology*, 15(11), pp. 1818–1836. doi: 10.1111/cmi.12150.
- 1376 Cerqueira, C. *et al.* (2015) 'Kallikrein-8 Proteolytically Processes Human  
1377 Papillomaviruses in the Extracellular Space To Facilitate Entry into Host Cells.',  
1378 *Journal of virology*, 89(14), pp. 7038–52. doi: 10.1128/JVI.00234-15.
- 1379 Chadda, R. *et al.* (2007) 'Cholesterol-sensitive Cdc42 activation regulates actin  
1380 polymerization for endocytosis via the GEEC pathway', *Traffic*, 8(6), pp. 702–717.  
1381 doi: 10.1111/j.1600-0854.2007.00565.x.
- 1382 Collins, A. *et al.* (2011) 'Structural organization of the actin cytoskeleton at sites of  
1383 clathrin-mediated endocytosis', *Current Biology*, 21(14), pp. 1167–1175. doi:  
1384 10.1016/j.cub.2011.05.048.
- 1385 Culp, T. D. *et al.* (2006) 'Keratinocyte-Secreted Laminin 5 Can Function as a  
1386 Transient Receptor for Human Papillomaviruses by Binding Virions and Transferring  
1387 Them to Adjacent Cells', *Journal of Virology*, 80(18), pp. 8940–8950. doi:  
1388 10.1128/jvi.00724-06.
- 1389 Cureton, D. K. *et al.* (2009) 'Vesicular Stomatitis Virus Enters Cells through Vesicles  
1390 Incompletely Coated with Clathrin That Depend upon Actin for Internalization', *PLoS*  
1391 *Pathogens*, 5(4). doi: 10.1371/journal.ppat.1000394.

- 1392 Dawson, J. C., Legg, J. A. and Machesky, L. M. (2006) 'Bar domain proteins: a role  
1393 in tubulation, scission and actin assembly in clathrin-mediated endocytosis', *Trends*  
1394 *in Cell Biology*, 16(10), pp. 493–498. doi: 10.1016/j.tcb.2006.08.004.
- 1395 Day, P. M. *et al.* (2013) 'Identification of a role for the trans-Golgi network in human  
1396 papillomavirus 16 pseudovirus infection.', *Journal of virology*, 87(7), pp. 3862–70.  
1397 doi: 10.1128/JVI.03222-12.
- 1398 Day, P. M., Lowy, D. R. and Schiller, J. T. (2003) 'Papillomaviruses infect cells via a  
1399 clathrin-dependent pathway', *Virology*, 307(1), pp. 1–11. doi: 10.1016/S0042-  
1400 6822(02)00143-5.
- 1401 Derivery, E. *et al.* (2009) 'The Arp2/3 Activator WASH Controls the Fission  
1402 of Endosomes through a Large Multiprotein Complex', *Developmental Cell*, 17(5), pp.  
1403 712–723. doi: 10.1016/j.devcel.2009.09.010.
- 1404 DeTulleo, L. and Kirchhausen, T. (1998) 'The clathrin endocytic pathway in viral  
1405 infection', *EMBO Journal*, 17(16), pp. 4585–4593. doi: 10.1093/emboj/17.16.4585.
- 1406 Doherty, G. J. and McMahon, H. T. (2009) 'Mechanisms of endocytosis.', *Annual*  
1407 *review of biochemistry*, 78(April), pp. 857–902. doi:  
1408 10.1146/annurev.biochem.78.081307.110540.
- 1409 Doorbar, J. (2005) 'The papillomavirus life cycle.', *Journal of clinical virology* □: *the*  
1410 *official publication of the Pan American Society for Clinical Virology*, 32 Suppl  
1411 1(SUPPL.), pp. S7-15. doi: 10.1016/j.jcv.2004.12.006.
- 1412 Duleh, S. N. and Welch, M. D. (2010) 'WASH and the Arp2/3 complex regulate  
1413 endosome shape and trafficking', *Cytoskeleton*, 67(3), p. NA-NA. doi:  
1414 10.1002/cm.20437.
- 1415 Dziduszko, A. and Ozbun, M. A. (2013) 'Annexin A2 and S100A10 regulate human  
1416 papillomavirus type 16 entry and intracellular trafficking in human keratinocytes.',  
1417 *Journal of virology*, 87(13), pp. 7502–15. doi: 10.1128/JVI.00519-13.
- 1418 Engel, S. *et al.* (2011) 'Role of endosomes in simian virus 40 entry and infection.',  
1419 *Journal of virology*, 85(9), pp. 4198–4211. doi: 10.1128/JVI.02179-10.
- 1420 Evander, M. *et al.* (1997) 'Identification of the alpha6 integrin as a candidate receptor  
1421 for papillomaviruses.', *Journal of virology*, 71(3), pp. 2449–56. Available at:  
1422 <http://www.ncbi.nlm.nih.gov/pubmed/9032382>%5Cn[http://www.pubmedcentral.nih.gov](http://www.pubmedcentral.nih.gov/articlerender.fcgi?artid=PMC191355)  
1423 [v/articlerender.fcgi?artid=PMC191355](http://www.pubmedcentral.nih.gov/articlerender.fcgi?artid=PMC191355).
- 1424 Ezratty, E. J., Partridge, M. A. and Gundersen, G. G. (2005) 'Microtubule-induced  
1425 focal adhesion disassembly is mediated by dynamin and focal adhesion kinase',

- 1426 *Nature Cell Biology*, 7(6), pp. 581–590. doi: 10.1038/ncb1262.
- 1427 Fast, L. A. *et al.* (2018) ‘Inhibition of tetraspanin functions impairs human  
1428 papillomavirus and cytomegalovirus infections’, *International Journal of Molecular*  
1429 *Sciences*, 19(10). doi: 10.3390/ijms19103007.
- 1430 Florin, L. and Lang, T. (2018) ‘Tetraspanin Assemblies in Virus Infection’, *Frontiers in*  
1431 *Immunology*, 9(May), pp. 1–9. doi: 10.3389/fimmu.2018.01140.
- 1432 Gallop, J. L. *et al.* (2006) ‘Mechanism of endophilin N-BAR domain-mediated  
1433 membrane curvature.’, *The EMBO journal*, 25(12), pp. 2898–2910. doi:  
1434 10.1038/sj.emboj.7601174.
- 1435 Giroglou, T. *et al.* (2001) ‘Human Papillomavirus Infection Requires Cell Surface  
1436 Heparan Sulfate’, *Journal of Virology*, 75(3), pp. 1565–1570. doi:  
1437 10.1128/JVI.75.3.1565.
- 1438 Gomez, T. S. and Billadeau, D. D. (2009) ‘A FAM21-Containing WASH Complex  
1439 Regulates Retromer-Dependent Sorting’, *Developmental Cell*, 17(5), pp. 699–711.  
1440 doi: 10.1016/j.devcel.2009.09.009.
- 1441 Hafezi, W. *et al.* (2012) ‘Entry of herpes simplex virus type 1 (HSV-1) into the distal  
1442 axons of trigeminal neurons favors the onset of nonproductive, silent infection’, *PLoS*  
1443 *Pathogens*, 8(5). doi: 10.1371/journal.ppat.1002679.
- 1444 Hänisch, J. *et al.* (2010) ‘Molecular dissection of Salmonella-induced membrane  
1445 ruffling versus invasion’, *Cellular Microbiology*, 12(1), pp. 84–98. doi: 10.1111/j.1462-  
1446 5822.2009.01380.x.
- 1447 Hao, Y. *et al.* (2013) ‘Regulation of WASH-Dependent Actin Polymerization and  
1448 Protein Trafficking by Ubiquitination’, *Cell*, 152(5), pp. 1051–1064. doi:  
1449 10.1016/j.cell.2013.01.051.
- 1450 Harbour, M. E., Breusegem, S. Y. and Seaman, M. N. J. (2012) ‘Recruitment of the  
1451 endosomal WASH complex is mediated by the extended “tail” of Fam21 binding to  
1452 the retromer protein Vps35’, *Biochemical Journal*, 442(1), pp. 209–220. doi:  
1453 10.1042/BJ20111761.
- 1454 Hayer, A. *et al.* (2010) ‘Biogenesis of caveolae: Stepwise assembly of large caveolin  
1455 and cavin complexes’, *Traffic*, 11(3), pp. 361–382. doi: 10.1111/j.1600-  
1456 0854.2009.01023.x.
- 1457 Helenius, A. (2018) ‘Virus Entry: Looking Back and Moving Forward’, *Journal of*  
1458 *Molecular Biology*. Elsevier Ltd, 430(13), pp. 1853–1862. doi:  
1459 10.1016/j.jmb.2018.03.034.

- 1460 Helenius, A. (2020) 'Standing on the Shoulders of Viruses', *Annual Review of*  
1461 *Biochemistry*, 89, pp. 21–43. doi: 10.1146/annurev-biochem-011320-103928.
- 1462 Helfer, E. *et al.* (2013) 'Endosomal recruitment of the WASH complex: Active  
1463 sequences and mutations impairing interaction with the retromer', *Biology of the Cell*,  
1464 105(5), pp. 191–207. doi: 10.1111/boc.201200038.
- 1465 Heuser, J. and Evans, L. (1980) 'Three-dimensional visualization of coated vesicle  
1466 formation in fibroblasts', *Journal of Cell Biology*, 84(3), pp. 560–583. doi:  
1467 10.1083/jcb.84.3.560.
- 1468 Hinshaw, J. E. and Schmid, S. L. (1995) 'Dynamain self-assembles into rings  
1469 suggesting a mechanism for coated vesicle budding.', *Nature*, 374(6518), pp. 190–2.  
1470 doi: 10.1038/374190a0.
- 1471 Huang, C.-Y. *et al.* (2008) 'A novel cellular protein, VPEF, facilitates vaccinia virus  
1472 penetration into HeLa cells through fluid phase endocytosis.', *Journal of virology*,  
1473 82(16), pp. 7988–99. doi: 10.1128/JVI.00894-08.
- 1474 Humbel, B. M., Stierhof, Y.-D. (2009) 'Cryosectioning according to Tokuyasu', in  
1475 Cavalier, A., Spehner, D., Humbel, B. M. (ed.) *Handbook of cryopreparation methods*  
1476 *for electron microscopy*.
- 1477 Hwang, S., Takimoto, T. and Hemler, M. E. (2019) 'Integrin-independent support of  
1478 cancer drug resistance by tetraspanin CD151', *Cellular and Molecular Life Sciences*.  
1479 Springer International Publishing, 76(8), pp. 1595–1604. doi: 10.1007/s00018-019-  
1480 03014-7.
- 1481 Jao, C. C. *et al.* (2010) 'Roles of amphipathic helices and the bin/amphiphysin/rvs  
1482 (BAR) domain of endophilin in membrane curvature generation', *Journal of Biological*  
1483 *Chemistry*, 285(26), pp. 20164–20170. doi: 10.1074/jbc.M110.127811.
- 1484 Jia, D. *et al.* (2012) 'Multiple repeat elements within the FAM21 tail link the WASH  
1485 actin regulatory complex to the retromer', *Molecular Biology of the Cell*, 23, pp.  
1486 2352–2361. doi: 10.1091/mbc.E11-12-1059.
- 1487 Johannsdottir, H. K. *et al.* (2009) 'Host cell factors and functions involved in vesicular  
1488 stomatitis virus entry.', *Journal of virology*, 83(1), pp. 440–53. doi:  
1489 10.1128/JVI.01864-08.
- 1490 Johnson, K. M. *et al.* (2009) 'Role of Heparan Sulfate in Attachment to and Infection  
1491 of the Murine Female Genital Tract by Human Papillomavirus', *Journal of Virology*,  
1492 83(5), pp. 2067–2074. doi: 10.1128/jvi.02190-08.
- 1493 Jones, J. C. R., Hopkinson, S. B. and Goldfinger, L. E. (1998) 'Structure and



1494 assembly of hemidesmosomes', *BioEssays*, 20(6), pp. 488–494. doi:  
1495 10.1002/(SICI)1521-1878(199806)20:6<488::AID-BIES7>3.0.CO;2-I.  
1496 Kage, F. *et al.* (2017) 'FMNL formins boost lamellipodial force generation', *Nature*  
1497 *Communications*, 8. doi: 10.1038/ncomms14832.  
1498 Kaksonen, M. and Roux, A. (2018) 'Mechanisms of clathrin-mediated endocytosis',  
1499 *Nature Reviews Molecular Cell Biology*. Nature Publishing Group, 19(5), pp. 313–  
1500 326. doi: 10.1038/nrm.2017.132.  
1501 Kamentsky, L. *et al.* (2011) 'Improved structure, function and compatibility for  
1502 cellprofiler: Modular high-throughput image analysis software', *Bioinformatics*, 27(8),  
1503 pp. 1179–1180. doi: 10.1093/bioinformatics/btr095.  
1504 Kirkham, M. *et al.* (2005) 'Ultrastructural identification of uncoated caveolin-  
1505 independent early endocytic vehicles', *Journal of Cell Biology*, 168(3), pp. 465–476.  
1506 doi: 10.1083/jcb.200407078.  
1507 Kvainickas, A. *et al.* (2017) 'Cargo-selective SNX-BAR proteins mediate retromer  
1508 trimer independent retrograde transport.', *The Journal of cell biology*, p.  
1509 jcb.201702137. doi: 10.1083/jcb.201702137.  
1510 Lakshminarayan, R. *et al.* (2014) 'Galectin-3 drives glycosphingolipid-dependent  
1511 biogenesis of clathrin-independent carriers', *Nature Cell Biology*, 16(6), pp. 592–603.  
1512 doi: 10.1038/ncb2970.  
1513 Landry, J. J. M. *et al.* (2013) 'The genomic and transcriptomic landscape of a HeLa  
1514 cell line.', *G3 (Bethesda, Md.)*, 3(8), pp. 1213–24. doi: 10.1534/g3.113.005777.  
1515 Liberali, P. *et al.* (2008) 'The closure of Pak1-dependent macropinosomes requires  
1516 the phosphorylation of CtBP1/BARS.', *The EMBO journal*, 27(7), pp. 970–81. doi:  
1517 10.1038/emboj.2008.59.  
1518 Lim, J. P. and Gleeson, P. A. (2011) 'Macropinocytosis: an endocytic pathway for  
1519 internalising large gulps', *Immunology and Cell Biology*, 89(8), pp. 836–843. doi:  
1520 10.1038/icb.2011.20.  
1521 Linardopoulou, E. V *et al.* (2007) 'Human subtelomeric WASH genes encode a new  
1522 subclass of the WASP family.', *PLoS genetics*, 3(12), p. e237. doi:  
1523 10.1371/journal.pgen.0030237.  
1524 Lipovsky, A. *et al.* (2013) 'Genome-wide siRNA screen identifies the retromer as a  
1525 cellular entry factor for human papillomavirus.', *Proceedings of the National Academy*  
1526 *of Sciences of the United States of America*, 110(18), pp. 7452–7. doi:  
1527 10.1073/pnas.1302164110.

- 1528 Lipovsky, A. *et al.* (2015) 'Application of the proximity-dependent assay and  
1529 fluorescence imaging approaches to study viral entry pathways.', *Methods in*  
1530 *molecular biology* (Clifton, N.J.), 1270, pp. 437–51. doi: 10.1007/978-1-4939-2309-  
1531 0\_30.
- 1532 Liu, L. *et al.* (2007) 'Tetraspanin CD151 promotes cell migration by regulating integrin  
1533 trafficking', *Journal of Biological Chemistry*, 282(43), pp. 31631–31642. doi:  
1534 10.1074/jbc.M701165200.
- 1535 Loerke, D. *et al.* (2009) 'Cargo and Dynamin Regulate Clathrin-Coated Pit  
1536 Maturation', *PLoS Biology*, 7(3). doi: 10.1371/journal.pbio.1000057.
- 1537 Machesky, L. M. and Insall, R. H. (1998) 'Scar1 and the related Wiskott-Aldrich  
1538 syndrome protein, WASP, regulate the actin cytoskeleton through the Arp2/3  
1539 complex', *Current Biology*, 8(25), pp. 1347–1356. doi: 10.1016/S0960-  
1540 9822(98)00015-3.
- 1541 Marsh, M. and Helenius, A. (1980) 'Adsorptive endocytosis of Semliki Forest virus',  
1542 *Journal of Molecular Biology*, 142(3), pp. 439–454. doi: 10.1016/0022-  
1543 2836(80)90281-8.
- 1544 Marsh, M. and Helenius, A. (2006) 'Virus entry: Open sesame', *Cell*, 124(4), pp. 729–  
1545 740. doi: 10.1016/j.cell.2006.02.007.
- 1546 Marsh, M., Kielian, M. C. and Helenius, A. (1984) 'Semliki forest virus entry and the  
1547 endocytic pathway', *Biochemical Society Transactions*, 12(6), pp. 981–983. doi:  
1548 10.1042/bst0120981.
- 1549 Mazzon, M. and Mercer, J. (2014) 'Lipid Interactions During Virus Entry and  
1550 Infection', *Cellular Microbiology*, 16(September), p. n/a-n/a. doi: 10.1111/cmi.12340.
- 1551 McMahon, H. T. and Boucrot, E. (2011) 'Molecular mechanism and physiological  
1552 functions of clathrin-mediated endocytosis', *Nature Publishing Group*, 12(8), pp. 517–  
1553 533. doi: 10.1038/nrm3151.
- 1554 Ménager, M. M. and Littman, D. R. (2016) 'Actin Dynamics Regulates Dendritic Cell-  
1555 Mediated Transfer of HIV-1 to T Cells', *Cell*, 164(4), pp. 695–709. doi:  
1556 10.1016/j.cell.2015.12.036.
- 1557 Mercer, J. and Helenius, A. (2008) 'Vaccinia virus uses macropinocytosis and  
1558 apoptotic mimicry to enter host cells.', *Science (New York, N.Y.)*, 320(5875), pp.  
1559 531–535. doi: 10.1126/science.1155164.
- 1560 Mercer, J., Schelhaas, M. and Helenius, A. (2010) 'Virus entry by endocytosis.',  
1561 *Annual review of biochemistry*, 79, pp. 803–33. doi: 10.1146/annurev-biochem-

1562 060208-104626.  
1563 Merrifield, C. J. *et al.* (2002) 'Imaging actin and dynamin recruitment during  
1564 invagination of single clathrin-coated pits', *Nat Cell Biol*, 4(9), pp. 691–698. doi:  
1565 10.1038/ncb837.  
1566 Merrifield, C. J. (2004) 'Seeing is believing: Imaging actin dynamics at single sites of  
1567 endocytosis', *Trends in Cell Biology*, 14(7), pp. 352–358. doi:  
1568 10.1016/j.tcb.2004.05.008.  
1569 Merrifield, C. J. and Kaksonen, M. (2014) 'Endocytic accessory factors and regulation  
1570 of clathrin-mediated endocytosis.', *Cold Spring Harbor perspectives in biology*, 6(11),  
1571 p. a016733. doi: 10.1101/cshperspect.a016733.  
1572 Mikuličić, S. *et al.* (2019) 'ADAM17-dependent signaling is required for oncogenic  
1573 human papillomavirus entry platform assembly.', *eLife*, 8. doi: 10.7554/eLife.44345.  
1574 Mirabello, L. *et al.* (2017) 'HPV16 E7 Genetic Conservation Is Critical to  
1575 Carcinogenesis', *Cell*, 170(6), pp. 1164-1174.e6. doi: 10.1016/j.cell.2017.08.001.  
1576 Mooren, O. L., Galletta, B. J. and Cooper, J. A. (2012) 'Roles for Actin Assembly in  
1577 Endocytosis', *Annu. Rev. Biochem*, 81(May), pp. 661–86. doi: 10.1146/annurev-  
1578 biochem-060910-094416.  
1579 Morlot, S. and Roux, A. (2013) 'Mechanics of dynamin-mediated membrane fission.',  
1580 *Annual review of biophysics*, 42, pp. 629–49. doi: 10.1146/annurev-biophys-050511-  
1581 102247.  
1582 Nicola, A. V. *et al.* (2005) 'Herpes Simplex Virus Type 1 Enters Human Epidermal  
1583 Keratinocytes, but Not Neurons, via a pH-Dependent Endocytic Pathway', *Journal of*  
1584 *Virology*, 79(12), pp. 7609–7616. doi: 10.1128/jvi.79.12.7609-7616.2005.  
1585 Owaribe, K. *et al.* (1990) 'The hemidesmosomal plaque', *Differentiation*, 45(3), pp.  
1586 207–220. doi: 10.1111/j.1432-0436.1990.tb00475.x.  
1587 Pelkmans, L. *et al.* (2004) 'Caveolin-stabilized membrane domains as multifunctional  
1588 transport and sorting devices in endocytic membrane traffic', *Cell*, 118(6), pp. 767–  
1589 780. doi: 10.1016/j.cell.2004.09.003.  
1590 Pelkmans, L., Püntener, D. and Helenius (2002) 'Local Actin Polymerization and  
1591 Dynamin Recruitment in SV40-Induced Internalization of Caveolae', *Science*,  
1592 296(5567), pp. 535–539. doi: 10.1126/science.1069784.  
1593 Popa, A. *et al.* (2015) 'Direct Binding of Retromer to Human Papillomavirus Type 16  
1594 Minor Capsid Protein L2 Mediates Endosome Exit during Viral Infection', *PLoS*  
1595 *Pathogens*, 11(2), pp. 1–21. doi: 10.1371/journal.ppat.1004699.

- 1596 Popoff, V. *et al.* (2007) 'The retromer complex and clathrin define an early endosomal  
1597 retrograde exit site', *Journal of Cell Science*, 120(12), pp. 2022–2031. doi:  
1598 10.1242/jcs.003020.
- 1599 Pyeon, D. *et al.* (2009) 'Establishment of human papillomavirus infection requires cell  
1600 cycle progression', *PLoS Pathogens*, 5(2). doi: 10.1371/journal.ppat.1000318.
- 1601 Qualmann, B. and Kelly, R. B. (2000) 'Syndapin isoforms participate in receptor-  
1602 mediated endocytosis and actin organization', *Journal of Cell Biology*, 148(5), pp.  
1603 1047–1061. doi: 10.1083/jcb.148.5.1047.
- 1604 Qualmann, B., Koch, D. and Kessels, M. M. (2011) 'Let's go bananas: revisiting the  
1605 endocytic BAR code.', *The EMBO journal*, 30(17), pp. 3501–15. doi:  
1606 10.1038/emboj.2011.266.
- 1607 Quirin, K. *et al.* (2008) 'Lymphocytic choriomeningitis virus uses a novel endocytic  
1608 pathway for infectious entry via late endosomes', *Virology*, 378(1), pp. 21–33. doi:  
1609 10.1016/j.virol.2008.04.046.
- 1610 Raff, A. B. *et al.* (2013) 'The Evolving Field of Human Papillomavirus Receptor  
1611 Research: a Review of Binding and Entry', *Journal of Virology*, 87(11), pp. 6062–  
1612 6072. doi: 10.1128/JVI.00330-13.
- 1613 Ran, F. A. *et al.* (2013) 'Genome engineering using the CRISPR-Cas9 system.', *Nat*  
1614 *Protoc*, 8(11), pp. 2281–2308. doi: 10.1038/nprot.2013.143.
- 1615 Richards, R. M. *et al.* (2006) 'Cleavage of the papillomavirus minor capsid protein,  
1616 L2, at a furin consensus site is necessary for infection.', *Proceedings of the National*  
1617 *Academy of Sciences of the United States of America*, 103(5), pp. 1522–7. doi:  
1618 10.1073/pnas.0508815103.
- 1619 Riedl, J. *et al.* (2008) 'Lifeact: a versatile marker to visualize F-actin.', *Nature*  
1620 *methods*, 5(7), pp. 605–7. doi: 10.1038/nmeth.1220.
- 1621 Rizvi, S. A. *et al.* (2009) 'Identification and Characterization of a Small Molecule  
1622 Inhibitor of Formin-Mediated Actin Assembly', *Chemistry and Biology*. Elsevier Ltd,  
1623 16(11), pp. 1158–1168. doi: 10.1016/j.chembiol.2009.10.006.
- 1624 Roberts, J. N. *et al.* (2007) 'Genital transmission of HPV in a mouse model is  
1625 potentiated by nonoxynol-9 and inhibited by carrageenan', *Nature Medicine*, 13(7),  
1626 pp. 857–861. doi: 10.1038/nm1598.
- 1627 Rojek, J. M., Perez, M. and Kunz, S. (2008) 'Cellular Entry of Lymphocytic  
1628 Choriomeningitis Virus', *Journal of Virology*, 82(3), pp. 1505–1517. doi:  
1629 10.1128/jvi.01331-07.

- 1630 Rottner, K., Hänisch, J. and Campellone, K. G. (2010) 'WASH, WHAMM and JMY:  
1631 regulation of Arp2/3 complex and beyond.', *Trends in cell biology*, 20(11), pp. 650–  
1632 61. doi: 10.1016/j.tcb.2010.08.014.
- 1633 Rust, M. J. *et al.* (2004) 'Assembly of endocytic machinery around individual  
1634 influenza viruses during viral entry', *Nature Structural and Molecular Biology*, 11(6),  
1635 pp. 567–573. doi: 10.1038/nsmb769.
- 1636 Saalfeld, S. and Tomancák, P. (2008) 'Automatic landmark correspondence  
1637 detection for ImageJ', *Proceedings of the ImageJ User and Developer Conference*,  
1638 pp. 128–133. Available at: [http://fly.mpi-](http://fly.mpi-cbg.de/~saalfeld/Publications/download/imagejconf2008.pdf)  
1639 [cbg.de/~saalfeld/Publications/download/imagejconf2008.pdf](http://fly.mpi-cbg.de/~saalfeld/Publications/download/imagejconf2008.pdf).
- 1640 de Sanjose, S. *et al.* (2010) 'Human papillomavirus genotype attribution in invasive  
1641 cervical cancer: a retrospective cross-sectional worldwide study', *The Lancet*  
1642 *Oncology*, 11(11), pp. 1048–1056. doi: 10.1016/S1470-2045(10)70230-8.
- 1643 Scheffer, K. D. *et al.* (2013) 'Tetraspanin CD151 Mediates Papillomavirus Type 16  
1644 Endocytosis', *Journal of Virology*, 87(6), pp. 3435–3446. doi: 10.1128/JVI.02906-12.
- 1645 Schelhaas, M. *et al.* (2003) 'Herpes simplex virus type 1 exhibits a tropism for basal  
1646 entry in polarized epithelial cells', *Journal of General Virology*, 84(9), pp. 2473–2484.  
1647 doi: 10.1099/vir.0.19226-0.
- 1648 Schelhaas, M. *et al.* (2008) 'Human papillomavirus type 16 entry: Retrograde cell  
1649 surface transport along actin-rich protrusions', *PLoS Pathogens*, 4(9). doi:  
1650 10.1371/journal.ppat.1000148.
- 1651 Schelhaas, M. *et al.* (2012) 'Entry of human papillomavirus type 16 by actin-  
1652 dependent, clathrin- and lipid raft-independent endocytosis.', *PLoS pathogens*, 8(4),  
1653 p. e1002657. doi: 10.1371/journal.ppat.1002657.
- 1654 Schindelin, J. *et al.* (2012) 'Fiji: An open-source platform for biological-image  
1655 analysis', *Nature Methods*, 9(7), pp. 676–682. doi: 10.1038/nmeth.2019.
- 1656 Schmid, S. L. and Conner, S. D. (2003) 'Regulated portals of entry into the cell',  
1657 *Nature*, 422(March), pp. 37–44. Available at: [www.nature.com/nature](http://www.nature.com/nature).
- 1658 Seaman, M. N. J. (2012) 'The retromer complex - endosomal protein recycling and  
1659 beyond.', *Journal of cell science*, 125(Pt 20), pp. 4693–702. doi: 10.1242/jcs.103440.
- 1660 Selinka, H.-C. *et al.* (2007) 'Inhibition of transfer to secondary receptors by heparan  
1661 sulfate-binding drug or antibody induces noninfectious uptake of human  
1662 papillomavirus.', *Journal of virology*, 81(20), pp. 10970–80. doi: 10.1128/JVI.00998-  
1663 07.

- 1664 Shikama, N. *et al.* (1999) 'A novel cofactor for p300 that regulates the p53 response',  
1665 *Molecular Cell*, 4(3), pp. 365–376. doi: 10.1016/S1097-2765(00)80338-X.
- 1666 Shin, N. *et al.* (2008) 'SNX9 regulates tubular invagination of the plasma membrane  
1667 through interaction with actin cytoskeleton and dynamin 2.', *Journal of cell science*,  
1668 121(Pt 8), pp. 1252–63. doi: 10.1242/jcs.016709.
- 1669 Siddiqi, A. *et al.* (2018) 'Human Papillomavirus 16 Infection Induces VAP-Dependent  
1670 Endosomal Tubulation', *Journal of Virology*. Edited by R. M. Longnecker, 92(6), pp.  
1671 1–14. doi: 10.1128/JVI.01514-17.
- 1672 Sieczkarski, S. B. and Whittaker, G. R. (2002) 'Influenza virus can enter and infect  
1673 cells in the absence of clathrin-mediated endocytosis.', *Journal of virology*, 76(20),  
1674 pp. 10455–64. doi: 10.1128/jvi.76.20.10455-10464.2002.
- 1675 Simonetti, B. *et al.* (2017) 'Sequence-dependent cargo recognition by SNX-BARs  
1676 mediates retromer-independent transport of CI-MPR', *Journal of Cell Biology*,  
1677 216(11), pp. 3695–3712. doi: 10.1083/jcb.201703015.
- 1678 Singh, I. and Helenius, A. (1992) 'Role of ribosomes in Semliki Forest virus  
1679 nucleocapsid uncoating.', *Journal of Virology*, 66(12), pp. 7049–7058. doi:  
1680 10.1128/jvi.66.12.7049-7058.1992.
- 1681 Smith, J. L. *et al.* (2008) 'Caveolin-1-Dependent Infectious Entry of Human  
1682 Papillomavirus Type 31 in Human Keratinocytes Proceeds to the Endosomal  
1683 Pathway for pH-Dependent Uncoating', *Journal of Virology*, 82(19), pp. 9505–9512.  
1684 doi: 10.1128/jvi.01014-08.
- 1685 Snijder, B. *et al.* (2012) 'Single-cell analysis of population context advances RNAi  
1686 screening at multiple levels.', *Molecular systems biology*, 8(579), p. 579. doi:  
1687 10.1038/msb.2012.9.
- 1688 Sochacki, K. A. *et al.* (2014) 'Correlative super-resolution fluorescence and metal-  
1689 replica transmission electron microscopy', *Nature Methods*, 11(3), pp. 305–308. doi:  
1690 10.1038/nmeth.2816.
- 1691 Söderberg, O. *et al.* (2006) 'Direct observation of individual endogenous protein  
1692 complexes in situ by proximity ligation', *Nature Methods*, 3(12), pp. 995–1000. doi:  
1693 10.1038/nmeth947.
- 1694 Sokac, A. M. *et al.* (2003) 'Cdc42-dependent actin polymerization during  
1695 compensatory endocytosis in *Xenopus* eggs.', *Nature cell biology*, 5(8), pp. 727–732.  
1696 doi: 10.1038/ncb1025.
- 1697 Soulet, F. *et al.* (2005) 'SNX9 Regulates Dynamin Assembly and Is Required for

- 1698 Efficient Clathrin-mediated Endocytosis', *Molecular Biology of the Cell*, 16(4), pp.  
1699 2058–2067. doi: 10.1091/mbc.e04-11-1016.
- 1700 Spoden, G. *et al.* (2008) 'Clathrin- and caveolin-independent entry of human  
1701 papillomavirus type 16--involvement of tetraspanin-enriched microdomains (TEMs).',  
1702 *PloS one*, 3(10), p. e3313. doi: 10.1371/journal.pone.0003313.
- 1703 Stechmann, B. *et al.* (2010) 'Inhibition of retrograde transport protects mice from  
1704 lethal ricin challenge', *Cell*, 141(2), pp. 231–242. doi: 10.1016/j.cell.2010.01.043.
- 1705 Steffen, A. *et al.* (2006) 'Filopodia Formation in the Absence of Functional WAVE-  
1706 and Arp2/3-Complexes', *Molecular Biology of the Cell*. Edited by M. Ginsberg, 17(6),  
1707 pp. 2581–2591. doi: 10.1091/mbc.e05-11-1088.
- 1708 Stoeber, M. *et al.* (2016) 'Model for the architecture of caveolae based on a flexible,  
1709 net-like assembly of Cavin1 and Caveolin discs', *Proceedings of the National*  
1710 *Academy of Sciences of the United States of America*, 113(50), pp. E8069–E8078.  
1711 doi: 10.1073/pnas.1616838113.
- 1712 Stradal, T. E. and Scita, G. (2006) 'Protein complexes regulating Arp2/3-mediated  
1713 actin assembly', *Current Opinion in Cell Biology*, 18(1), pp. 4–10. doi:  
1714 10.1016/j.ceb.2005.12.003.
- 1715 Suetsugu, S. *et al.* (2003) 'Differential roles of WAVE1 and WAVE2 in dorsal and  
1716 peripheral ruffle formation for fibroblast cell migration', *Developmental Cell*, 5(4), pp.  
1717 595–609. doi: 10.1016/S1534-5807(03)00297-1.
- 1718 Surviladze, Z., Dziduszko, A. and Ozbun, M. A. (2012) 'Essential roles for soluble  
1719 virion-associated heparan sulfonated proteoglycans and growth factors in human  
1720 papillomavirus infections.', *PLoS pathogens*, 8(2), p. e1002519. doi:  
1721 10.1371/journal.ppat.1002519.
- 1722 Sweitzer, S. M. and Hinshaw, J. E. (1998) 'Dynamin undergoes a GTP-dependent  
1723 conformational change causing vesiculation', *Cell*, 93(6), pp. 1021–1029. doi:  
1724 10.1016/S0092-8674(00)81207-6.
- 1725 Takei, K. *et al.* (1995) 'Tubular membrane invaginations coated by dynamin rings are  
1726 induced by GTP- $\gamma$ S in nerve terminals', *Nature*, 374(6518), pp. 186–190. doi:  
1727 10.1038/374186a0.
- 1728 Taylor, M. J., Lampe, M. and Merrifield, C. J. (2012) 'A feedback loop between  
1729 dynamin and actin recruitment during clathrin-mediated endocytosis', *PLoS Biology*,  
1730 10(4). doi: 10.1371/journal.pbio.1001302.
- 1731 Taylor, M. J., Perrais, D. and Merrifield, C. J. (2011) 'A high precision survey of the

1732 molecular dynamics of mammalian clathrin-mediated endocytosis', *PLoS Biology*,  
1733 9(3). doi: 10.1371/journal.pbio.1000604.

1734 Tokuyasu, K. T. (1980) 'Immunochemistry on ultrathin frozen sections', *The*  
1735 *Histochemical Journal*, 12(4), pp. 381–403. doi: 10.1007/BF01011956.

1736 Tsarouhas, V. *et al.* (2019) 'WASH phosphorylation balances endosomal versus  
1737 cortical actin network integrities during epithelial morphogenesis', *Nature*  
1738 *Communications*. Springer US, 10(1). doi: 10.1038/s41467-019-10229-6.

1739 Valente, C., Luini, A. and Corda, D. (2013) 'Components of the CtBP1/BARS-  
1740 dependent fission machinery', *Histochemistry and Cell Biology*, 140(4), pp. 407–421.  
1741 doi: 10.1007/s00418-013-1138-1.

1742 Ventayol, P. S. and Schelhaas, M. (2015) 'Fluorescently labeled human  
1743 papillomavirus pseudovirions for use in virus entry experiments', *Current Protocols in*  
1744 *Microbiology*, 2015(May), pp. 14B.4.1-14B.4.22. doi:  
1745 10.1002/9780471729259.mc14b04s37.

1746 de Vries, E. *et al.* (2011) 'Dissection of the influenza a virus endocytic routes reveals  
1747 macropinocytosis as an alternative entry pathway', *PLoS Pathogens*, 7(3), p.  
1748 e1001329. doi: 10.1371/journal.ppat.1001329.

1749 Walko, G., Castañón, M. J. and Wiche, G. (2015) 'Molecular architecture and  
1750 function of the hemidesmosome', *Cell and Tissue Research*, 360(3), pp. 529–544.  
1751 doi: 10.1007/s00441-015-2216-6.

1752 Webb, D. J., Parsons, J. T. and Horwitz, A. F. (2002) 'Adhesion assembly,  
1753 disassembly and turnover in migrating cells - Over and over and over again', *Nature*  
1754 *Cell Biology*, 4(4). doi: 10.1038/ncb0402-e97.

1755 Woodham, A. W. *et al.* (2012) 'The S100A10 subunit of the annexin A2  
1756 heterotetramer facilitates L2-mediated human papillomavirus infection.', *PloS one*,  
1757 7(8), p. e43519. doi: 10.1371/journal.pone.0043519.

1758 Xie, J. *et al.* (2020) 'TBC1D5-Catalyzed Cycling of Rab7 Is Required for Retromer-  
1759 Mediated Human Papillomavirus Trafficking during Virus Entry', *Cell Reports*, 31(10).  
1760 doi: 10.1016/j.celrep.2020.107750.

1761 Yarar, D., Waterman-Storer, C. M. and Schmid, S. L. (2007) 'SNX9 Couples Actin  
1762 Assembly to Phosphoinositide Signals and Is Required for Membrane Remodeling  
1763 during Endocytosis', *Developmental Cell*, 13(1), pp. 43–56. doi:  
1764 10.1016/j.devcel.2007.04.014.

1765 Yong, X. *et al.* (2020) 'Mechanism of cargo recognition by retromerlinked SNX-BAR



- 1766 proteins', *PLoS Biology*, 18(3), pp. 1–29. doi: 10.1371/journal.pbio.3000631.
- 1767 Yoon, C.-S. *et al.* (2001) 'α6 Integrin Is the Main Receptor of Human Papillomavirus
- 1768 Type 16 VLP', *Biochemical and Biophysical Research Communications*, 283(3), pp.
- 1769 668–673. doi: 10.1006/bbrc.2001.4838.
- 1770 Zhang, P. *et al.* (2018) 'Cell-Penetrating Peptide Mediates Intracellular Membrane
- 1771 Passage of Human Papillomavirus L2 Protein to Trigger Retrograde Trafficking', *Cell*,
- 1772 174(6), pp. 1465-1476.e13. doi: 10.1016/j.cell.2018.07.031.
- 1773 Zhong, Q. *et al.* (2002) 'Endosomal localization and function of sorting nexin 1.',
- 1774 *Proceedings of the National Academy of Sciences of the United States of America*,
- 1775 99(10), pp. 6767–6772. doi: 10.1073/pnas.092142699.
- 1776 Zuchero, J. B. *et al.* (2009) 'p53-cofactor JMY is a multifunctional actin nucleation
- 1777 factor', *Nature Cell Biology*, 11(4), pp. 451–459. doi: 10.1038/ncb1852.
- 1778

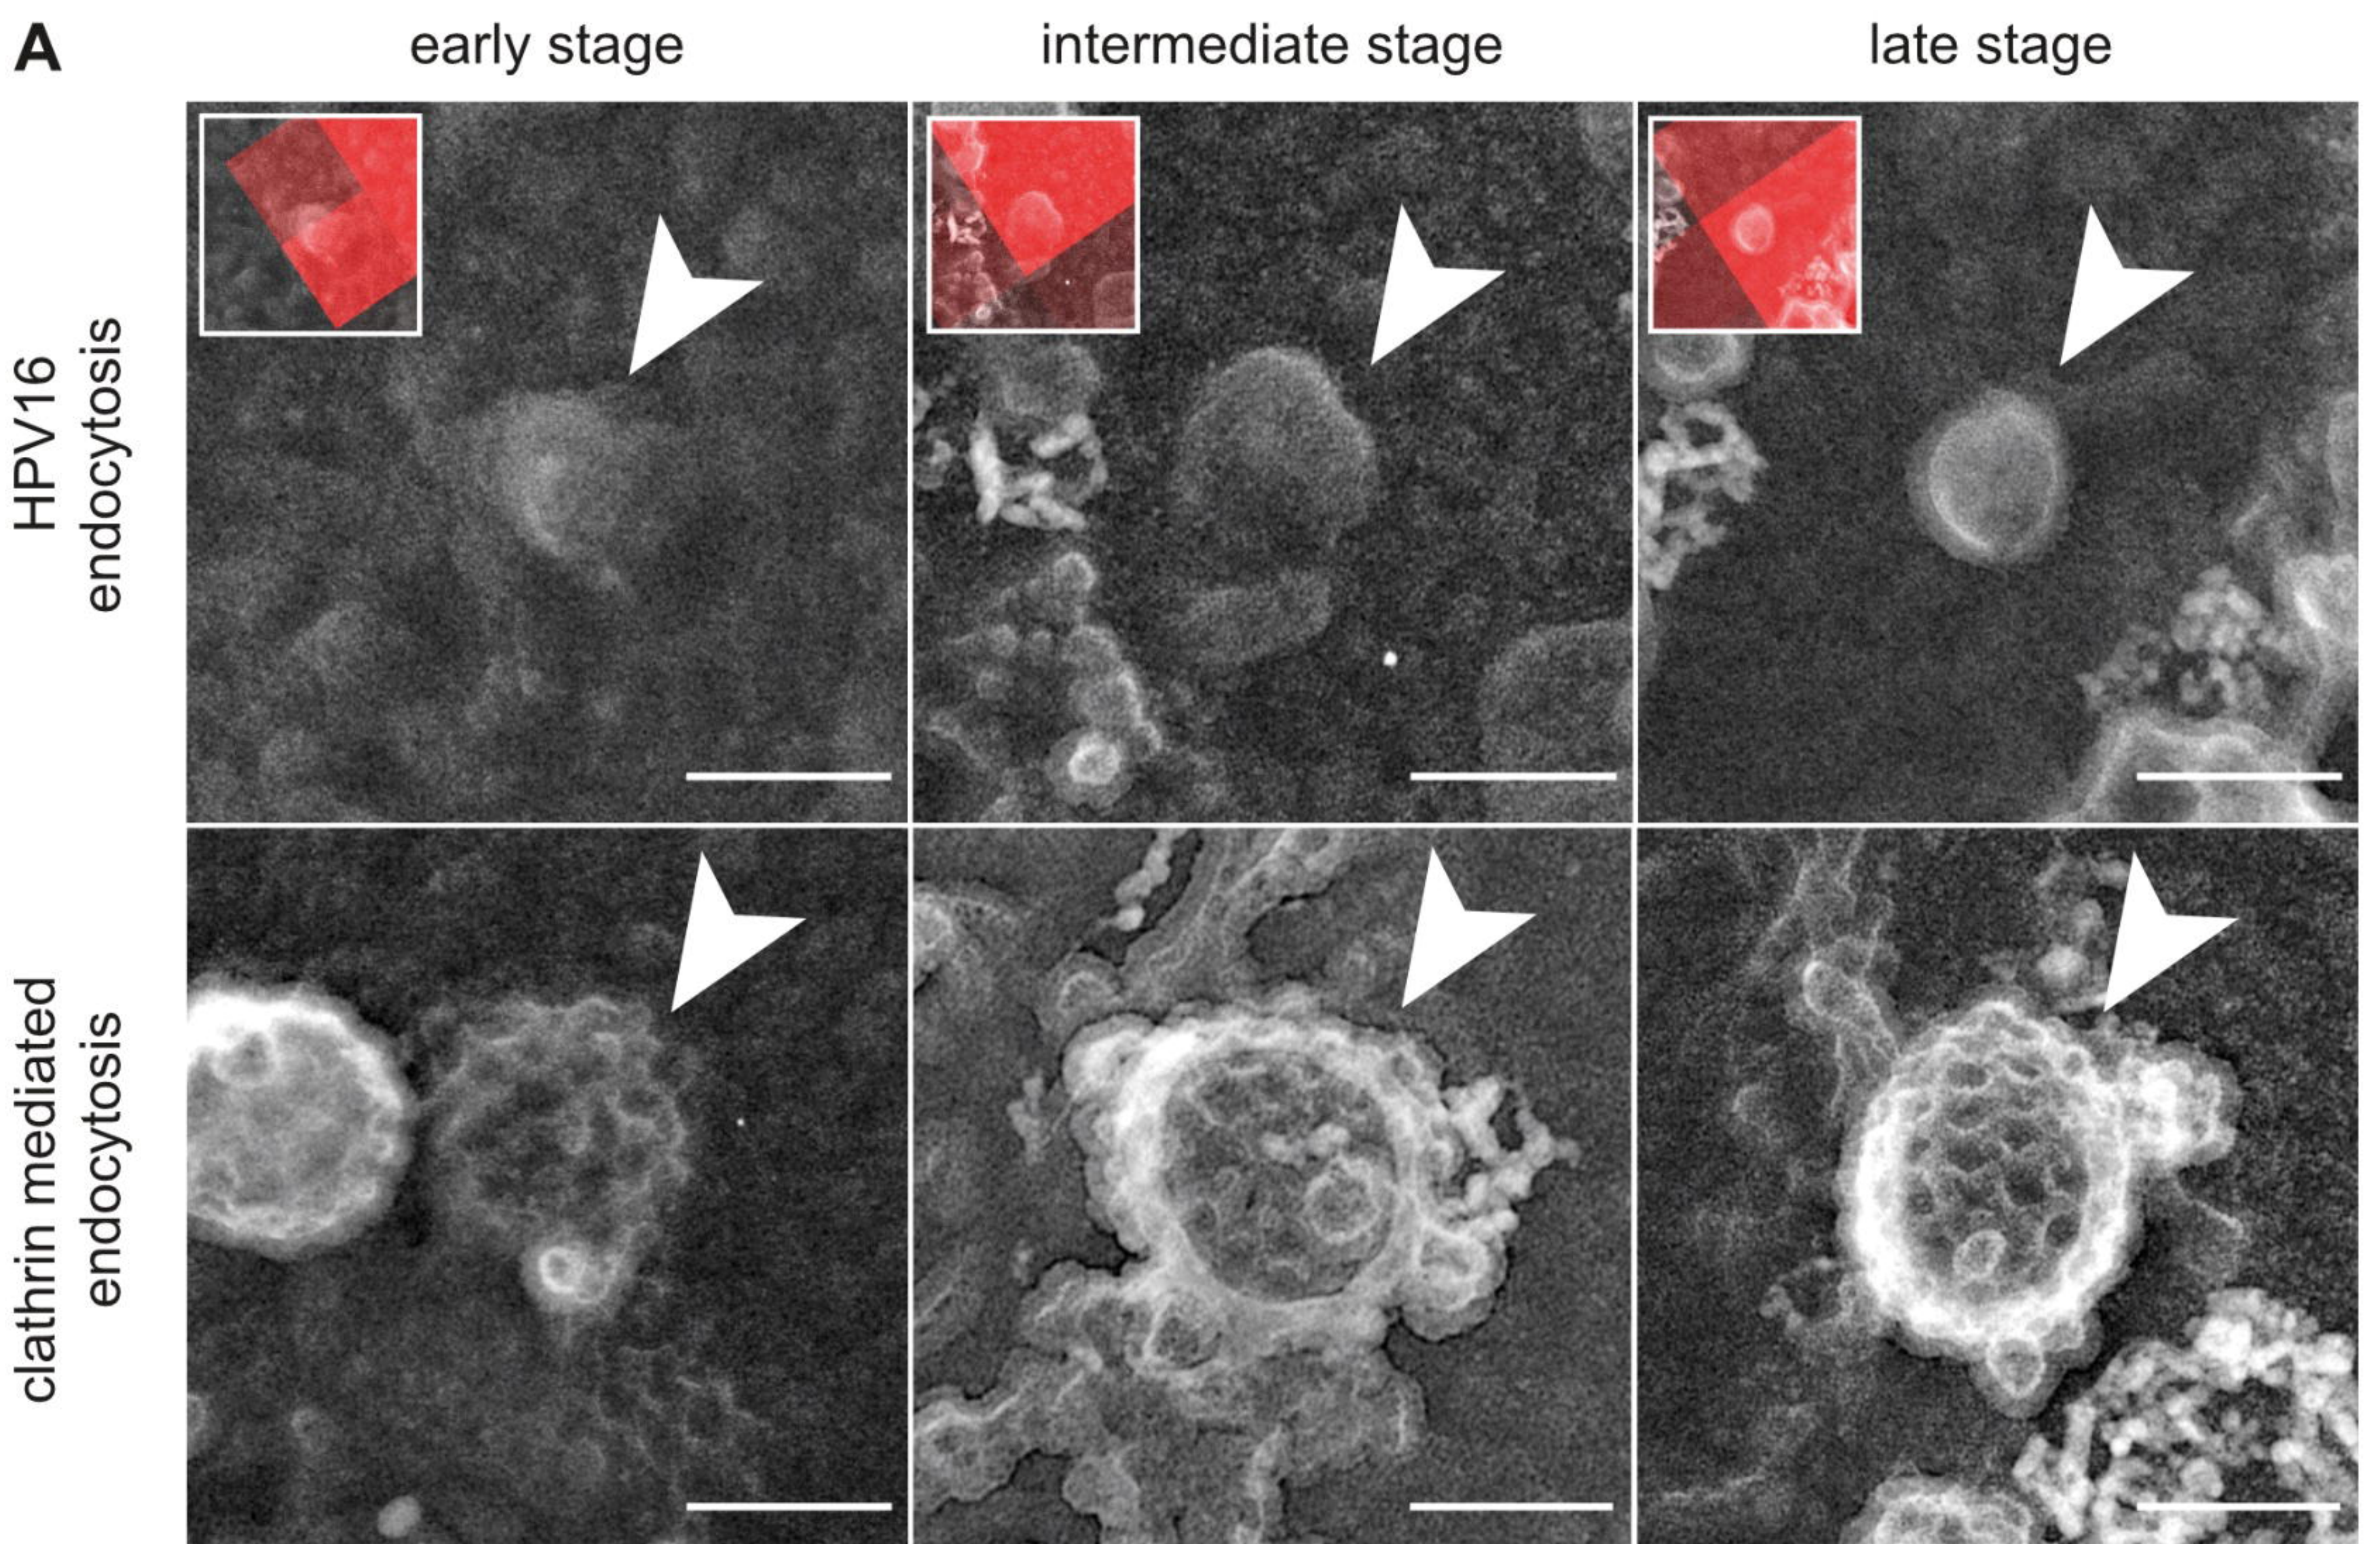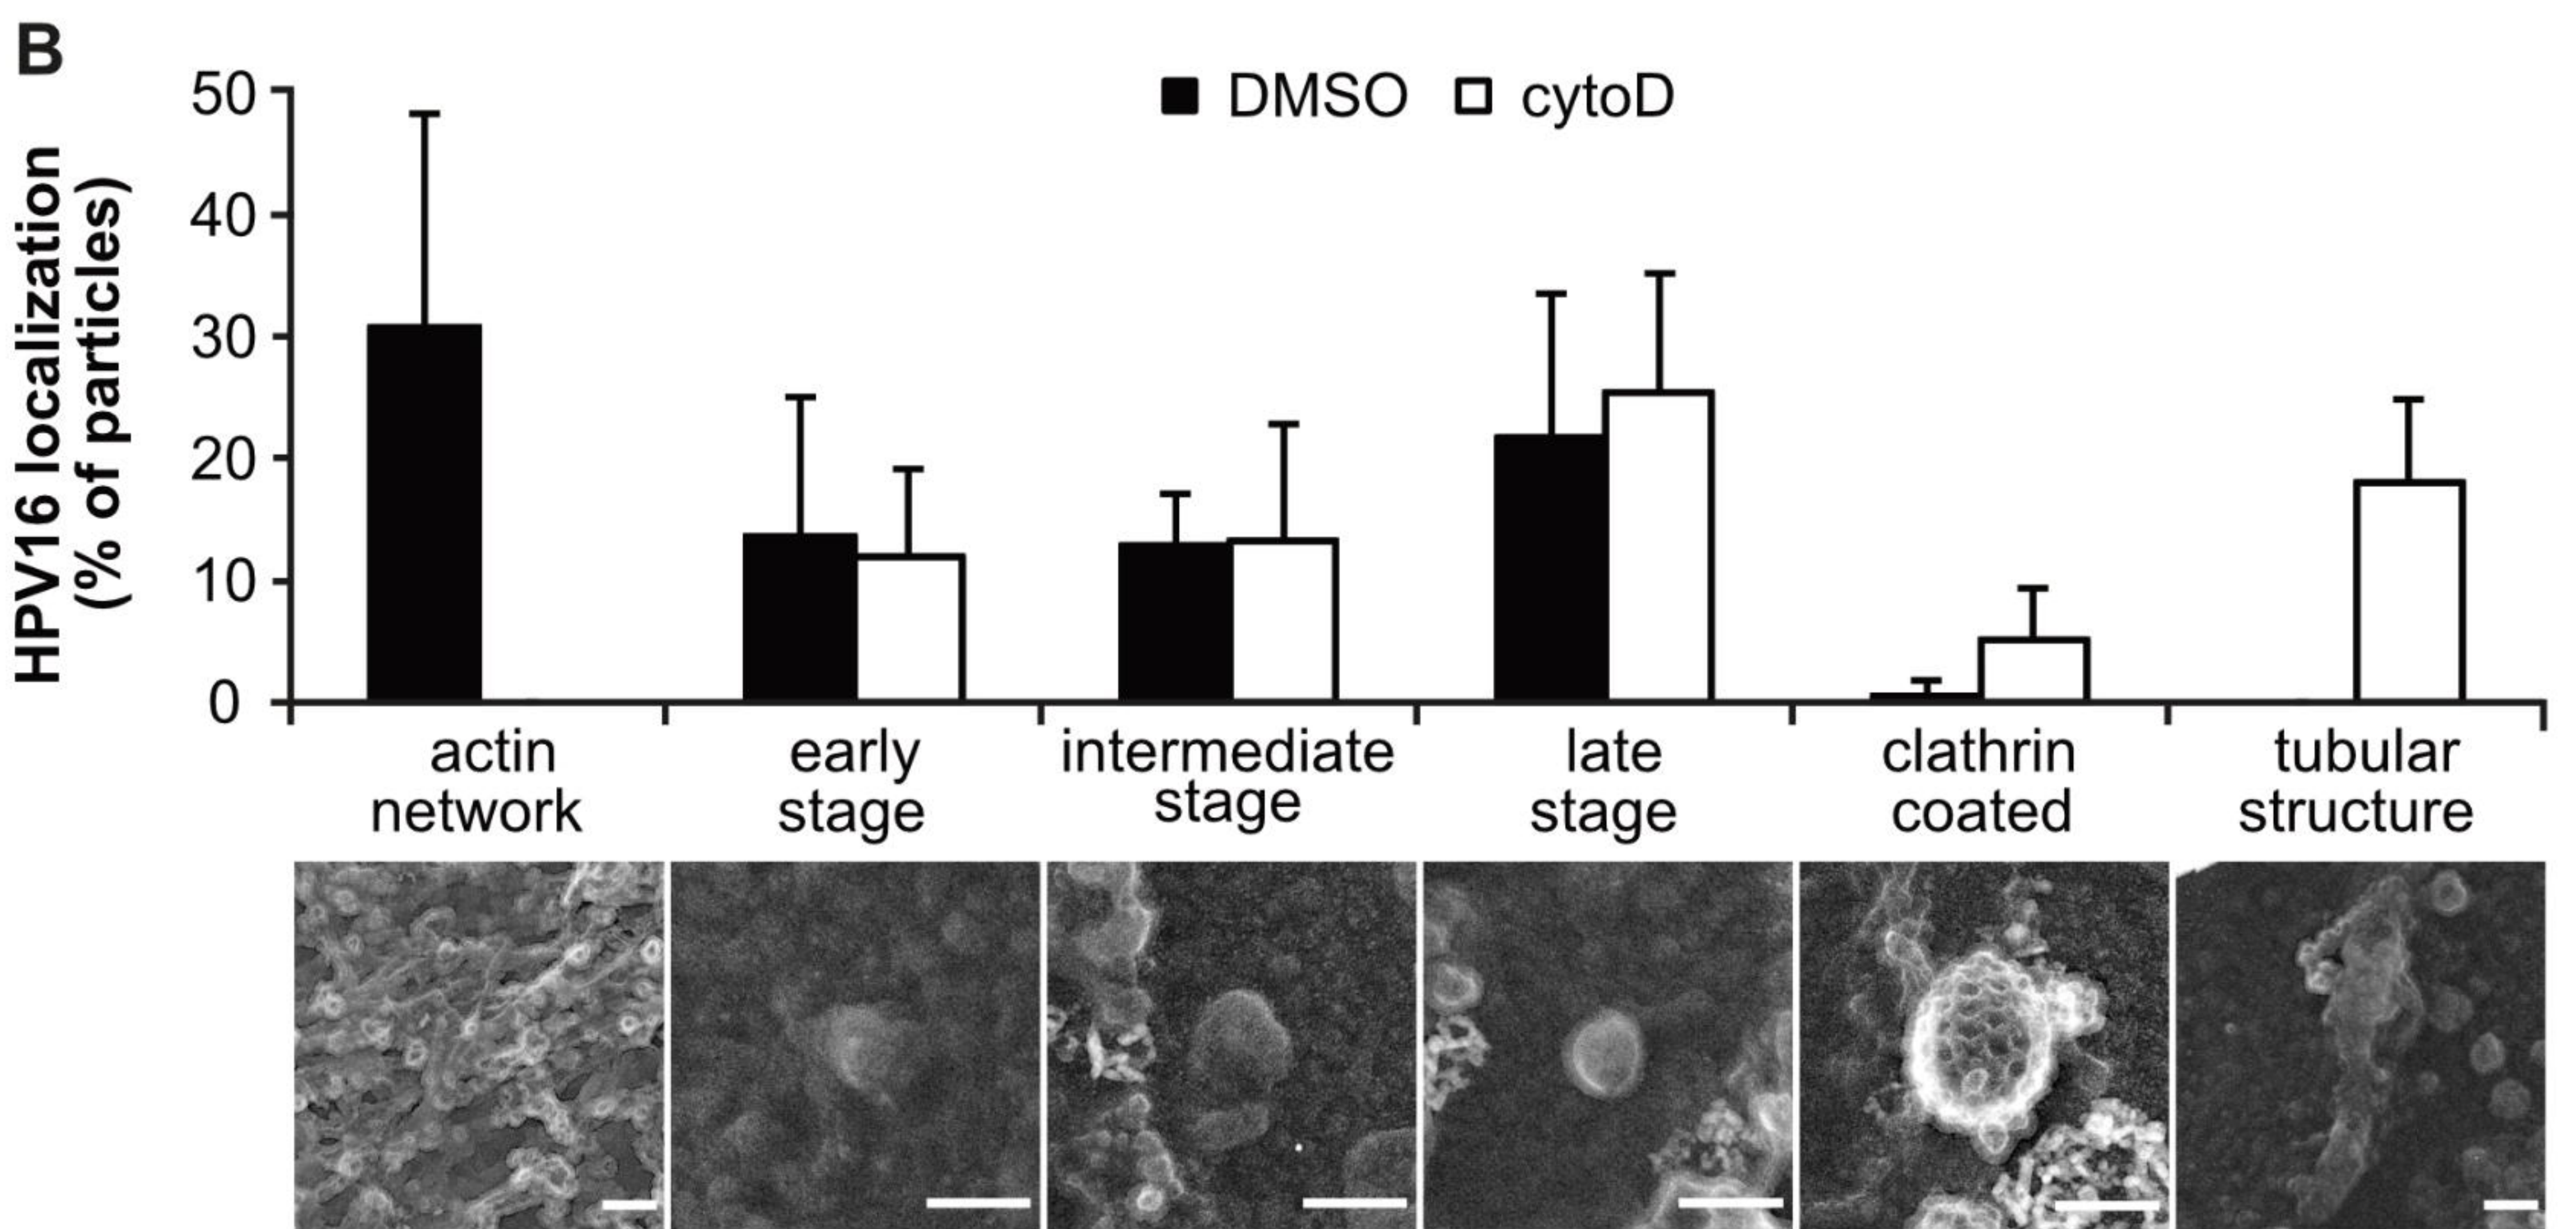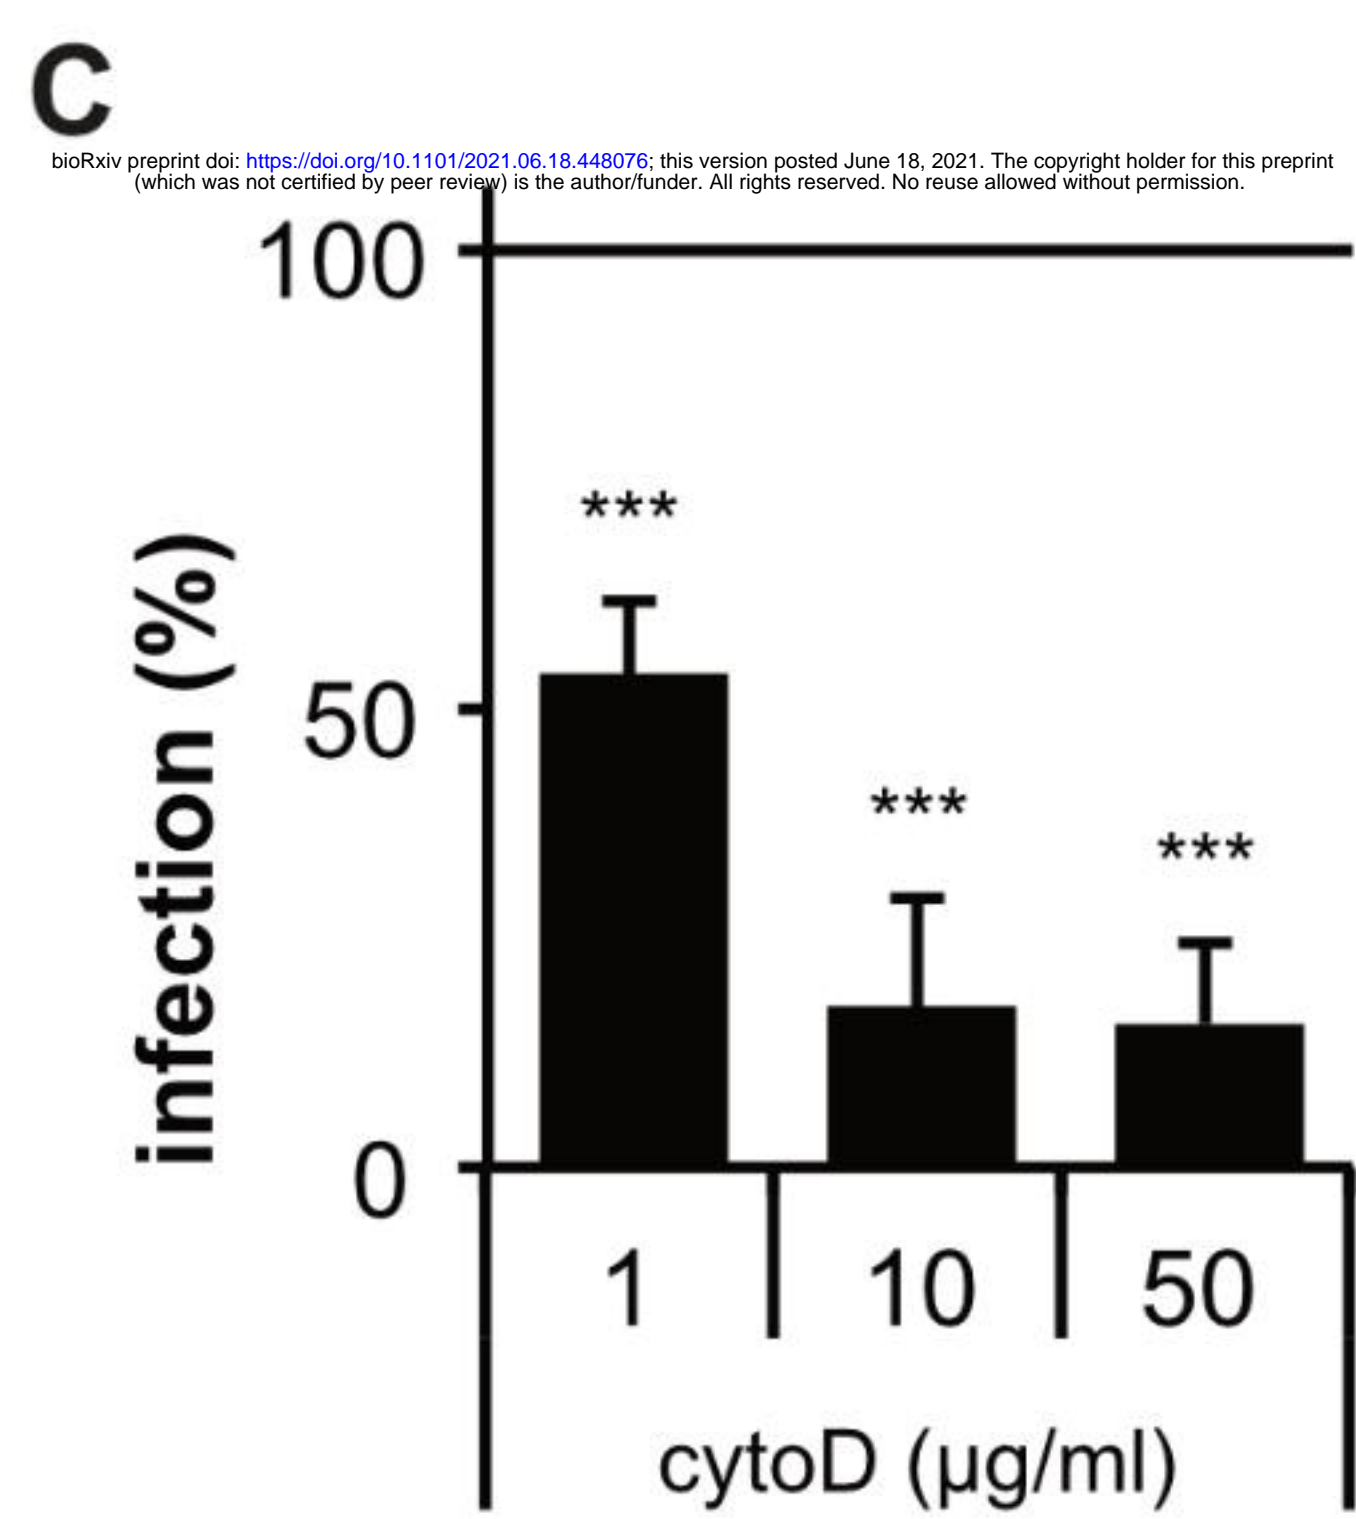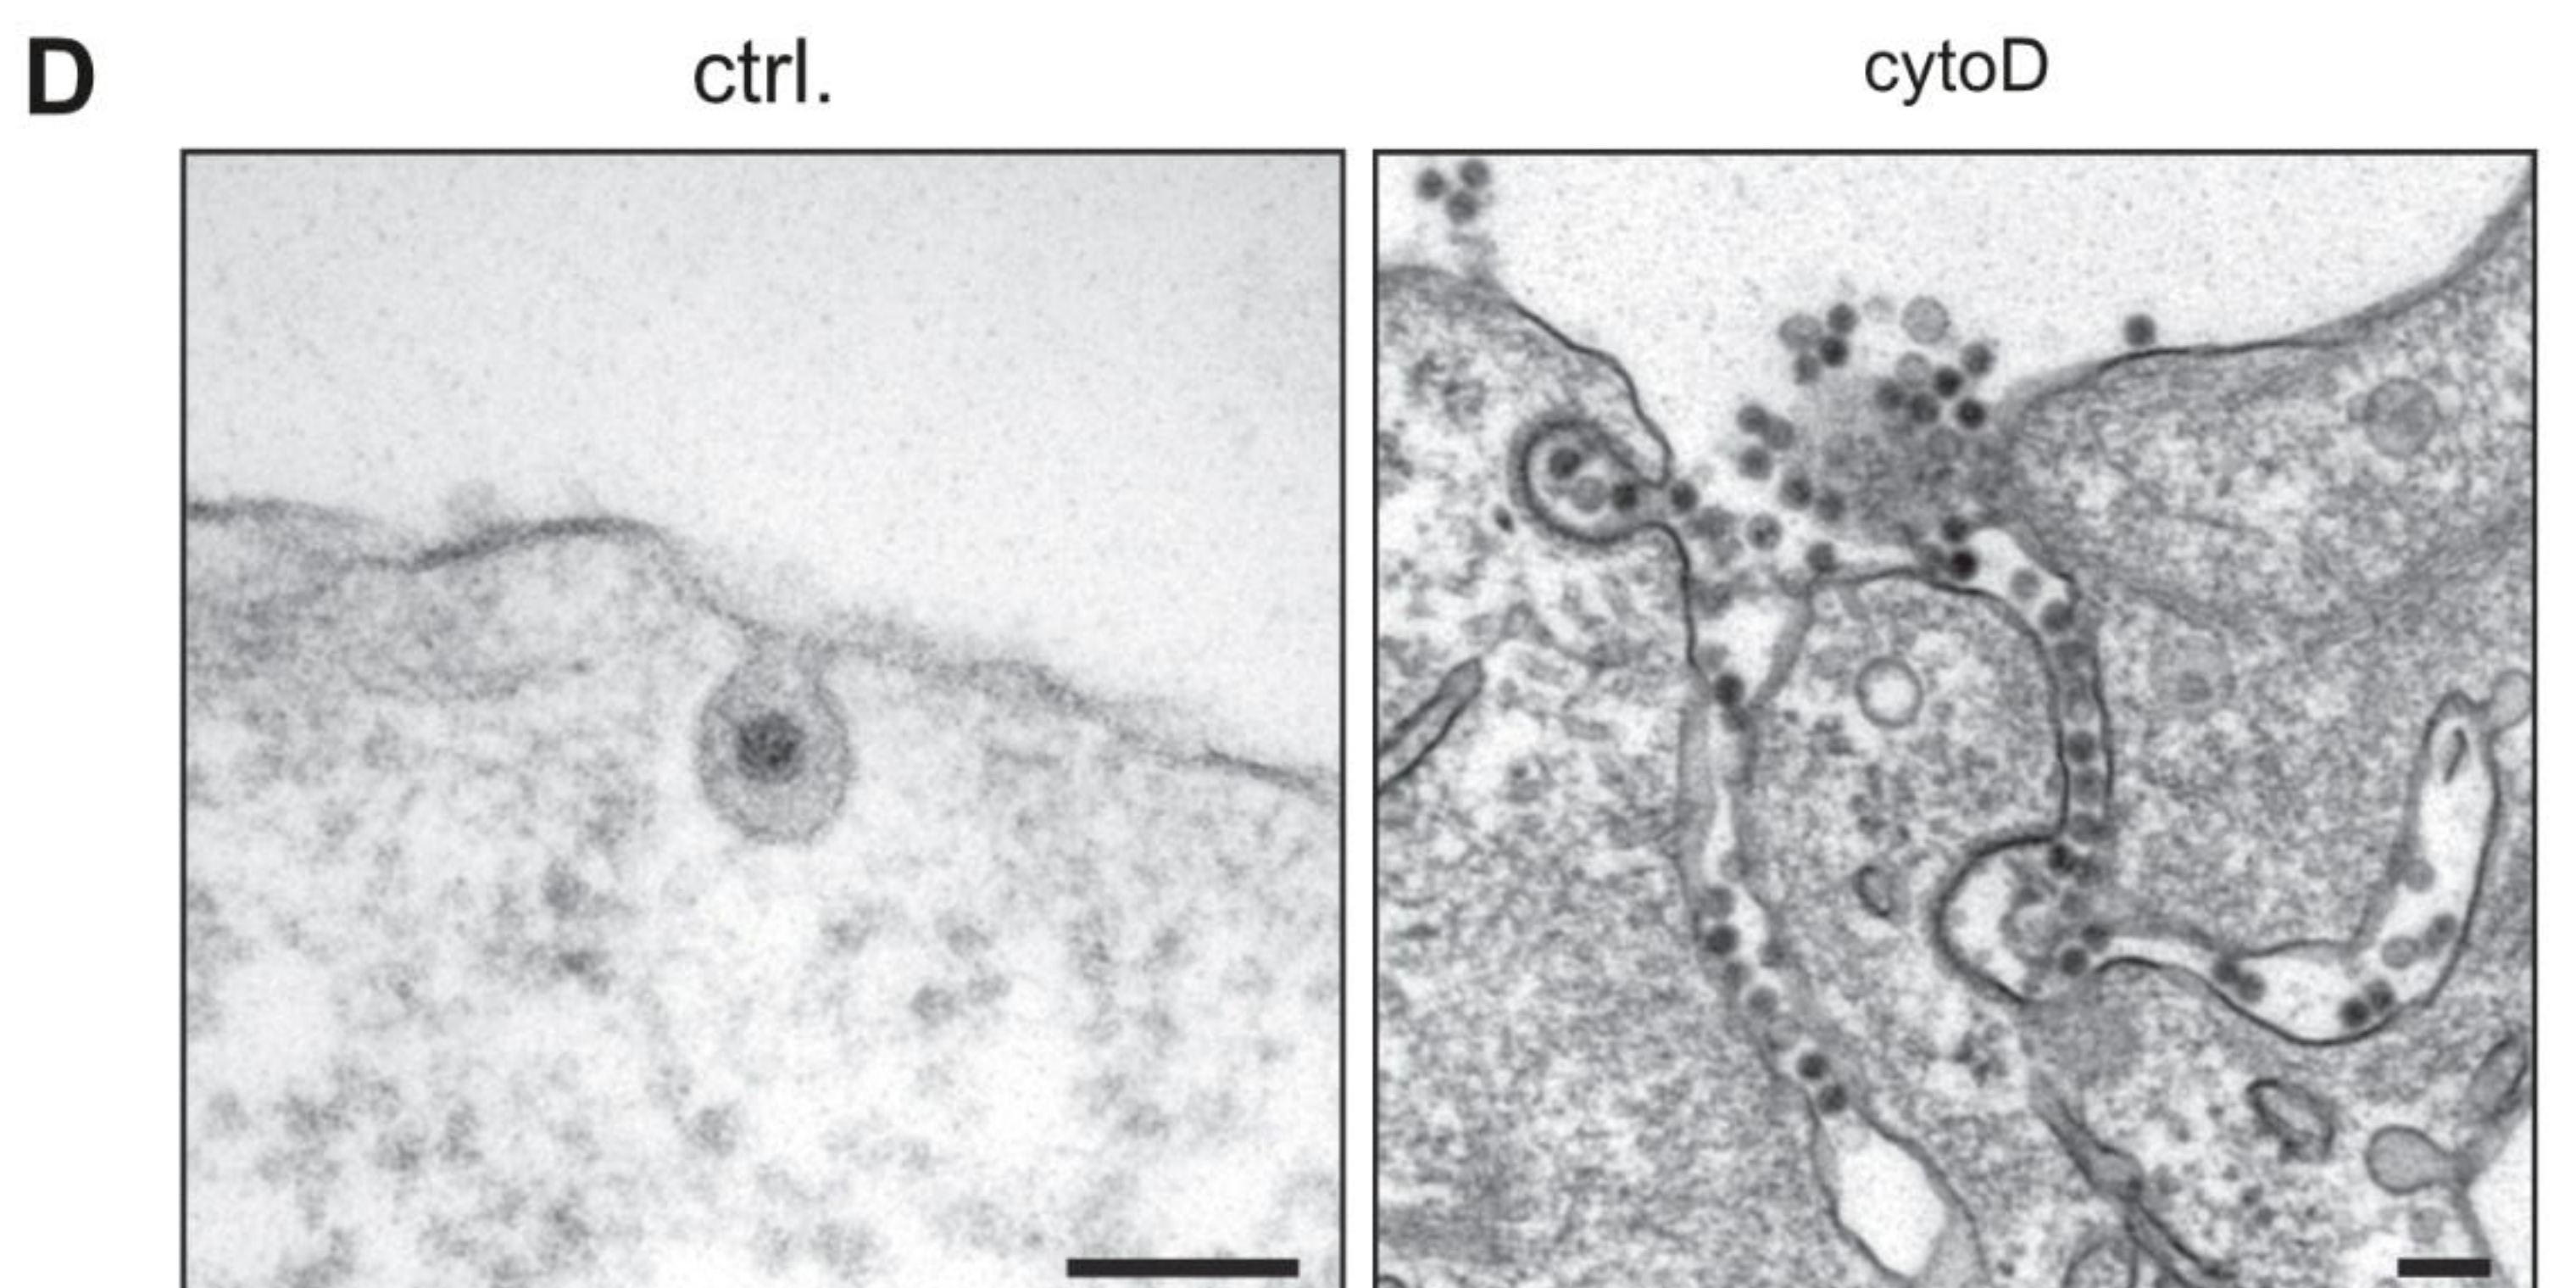

**A**

anti-actin 10 nm PAG

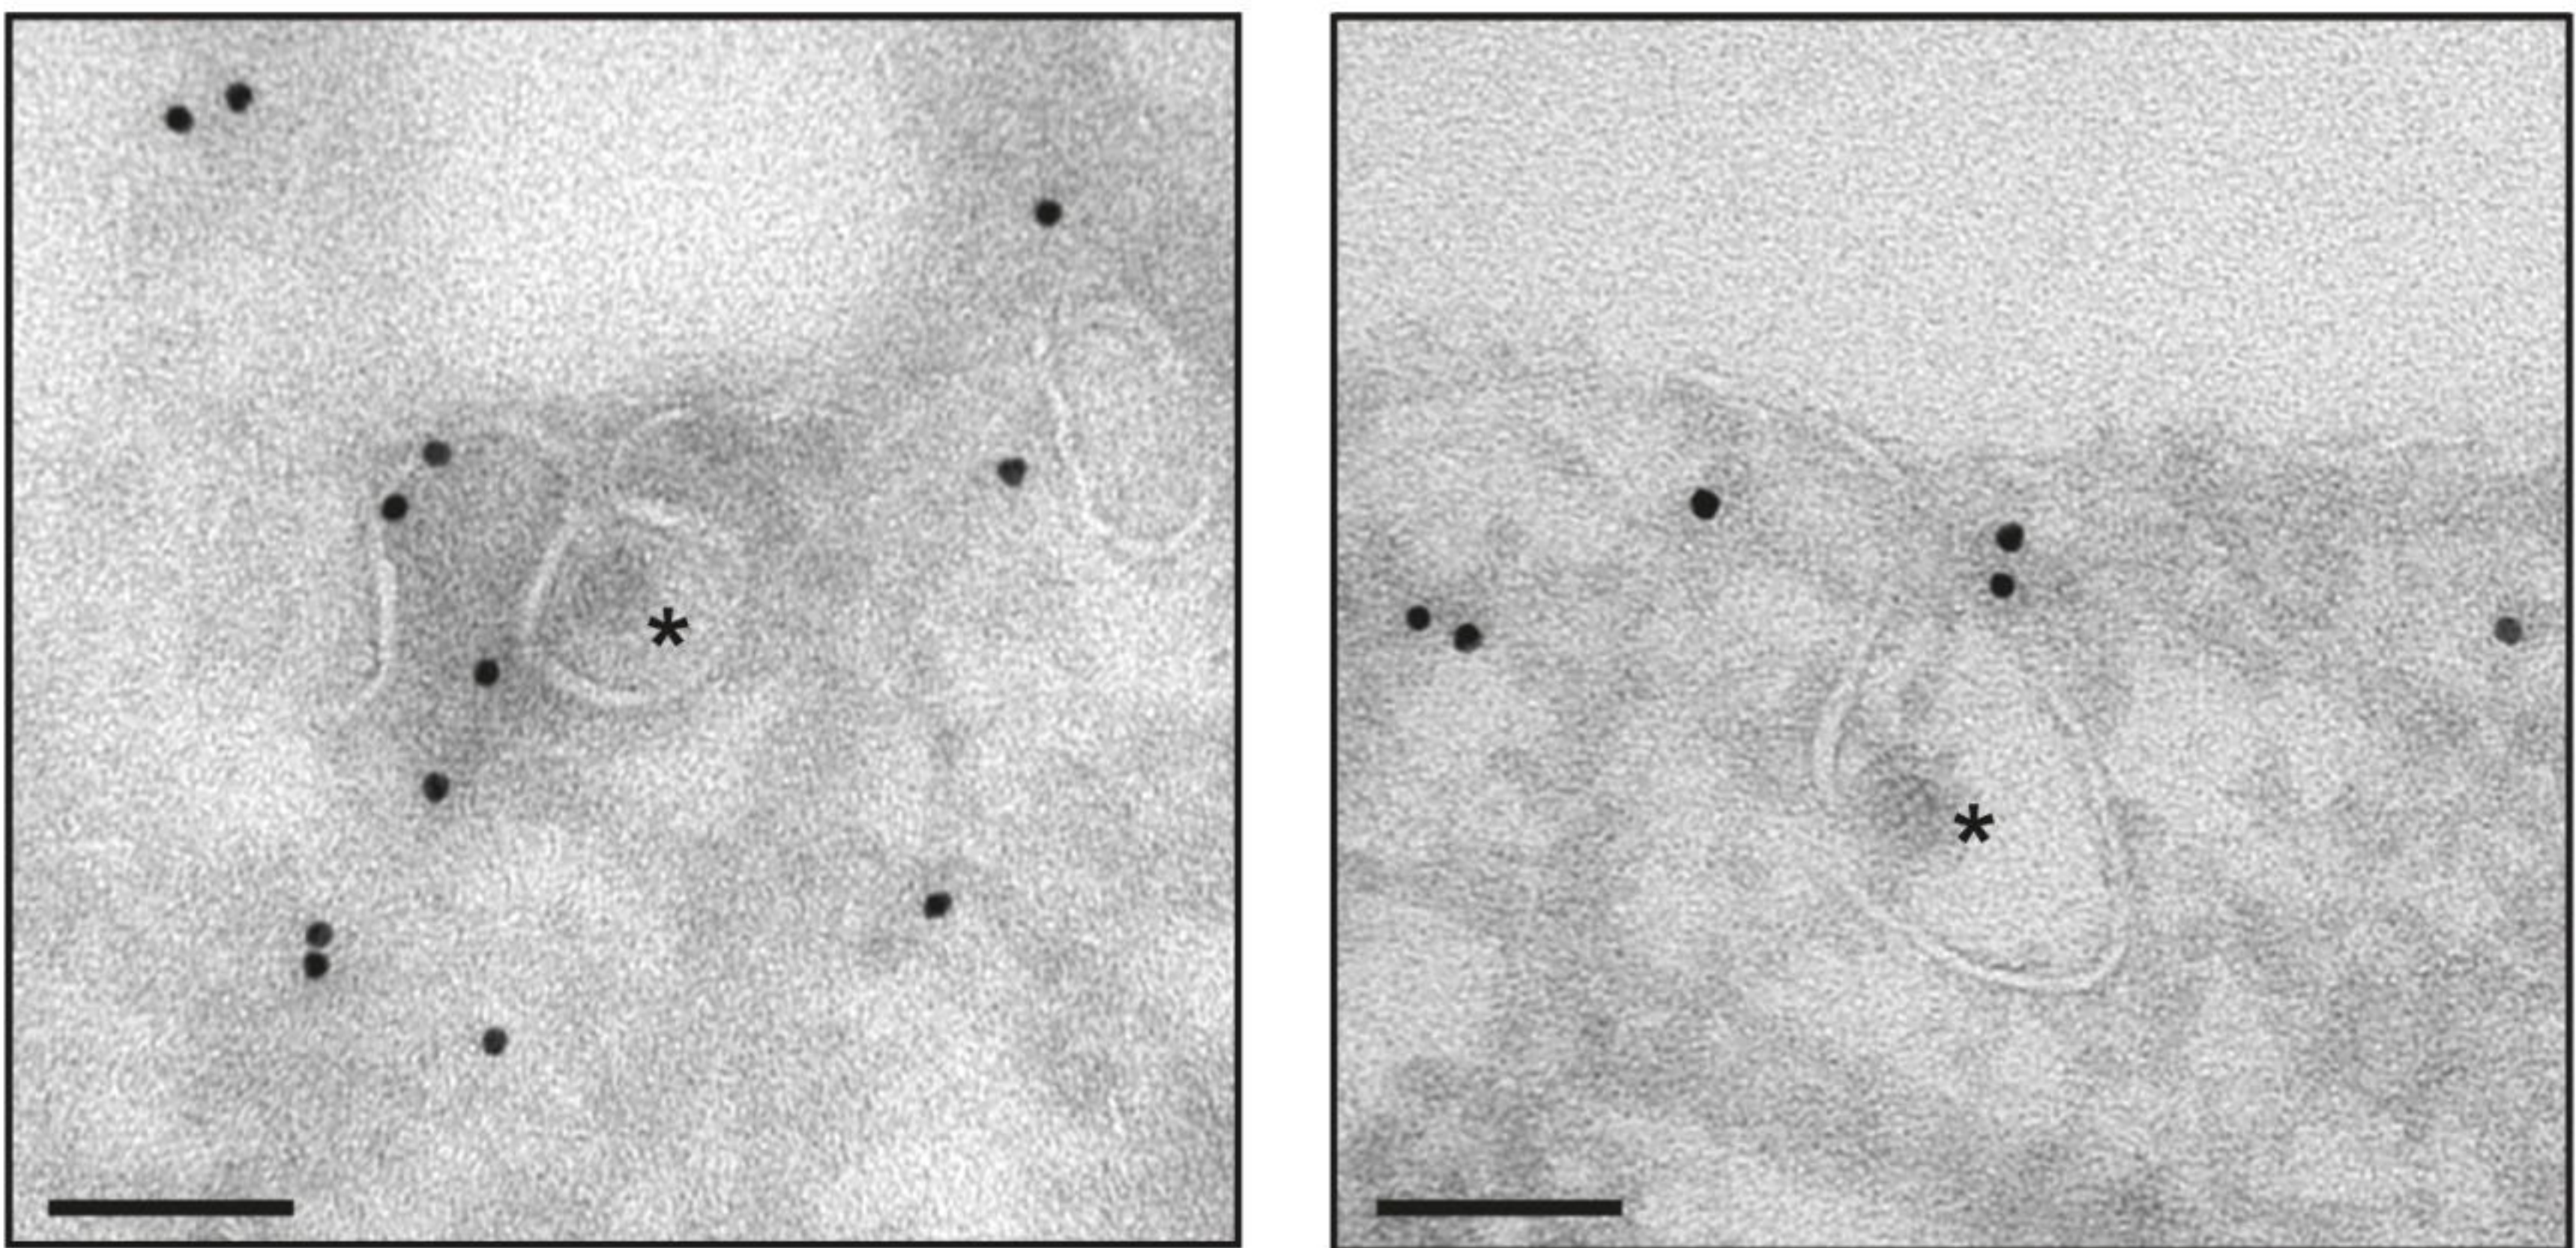**B**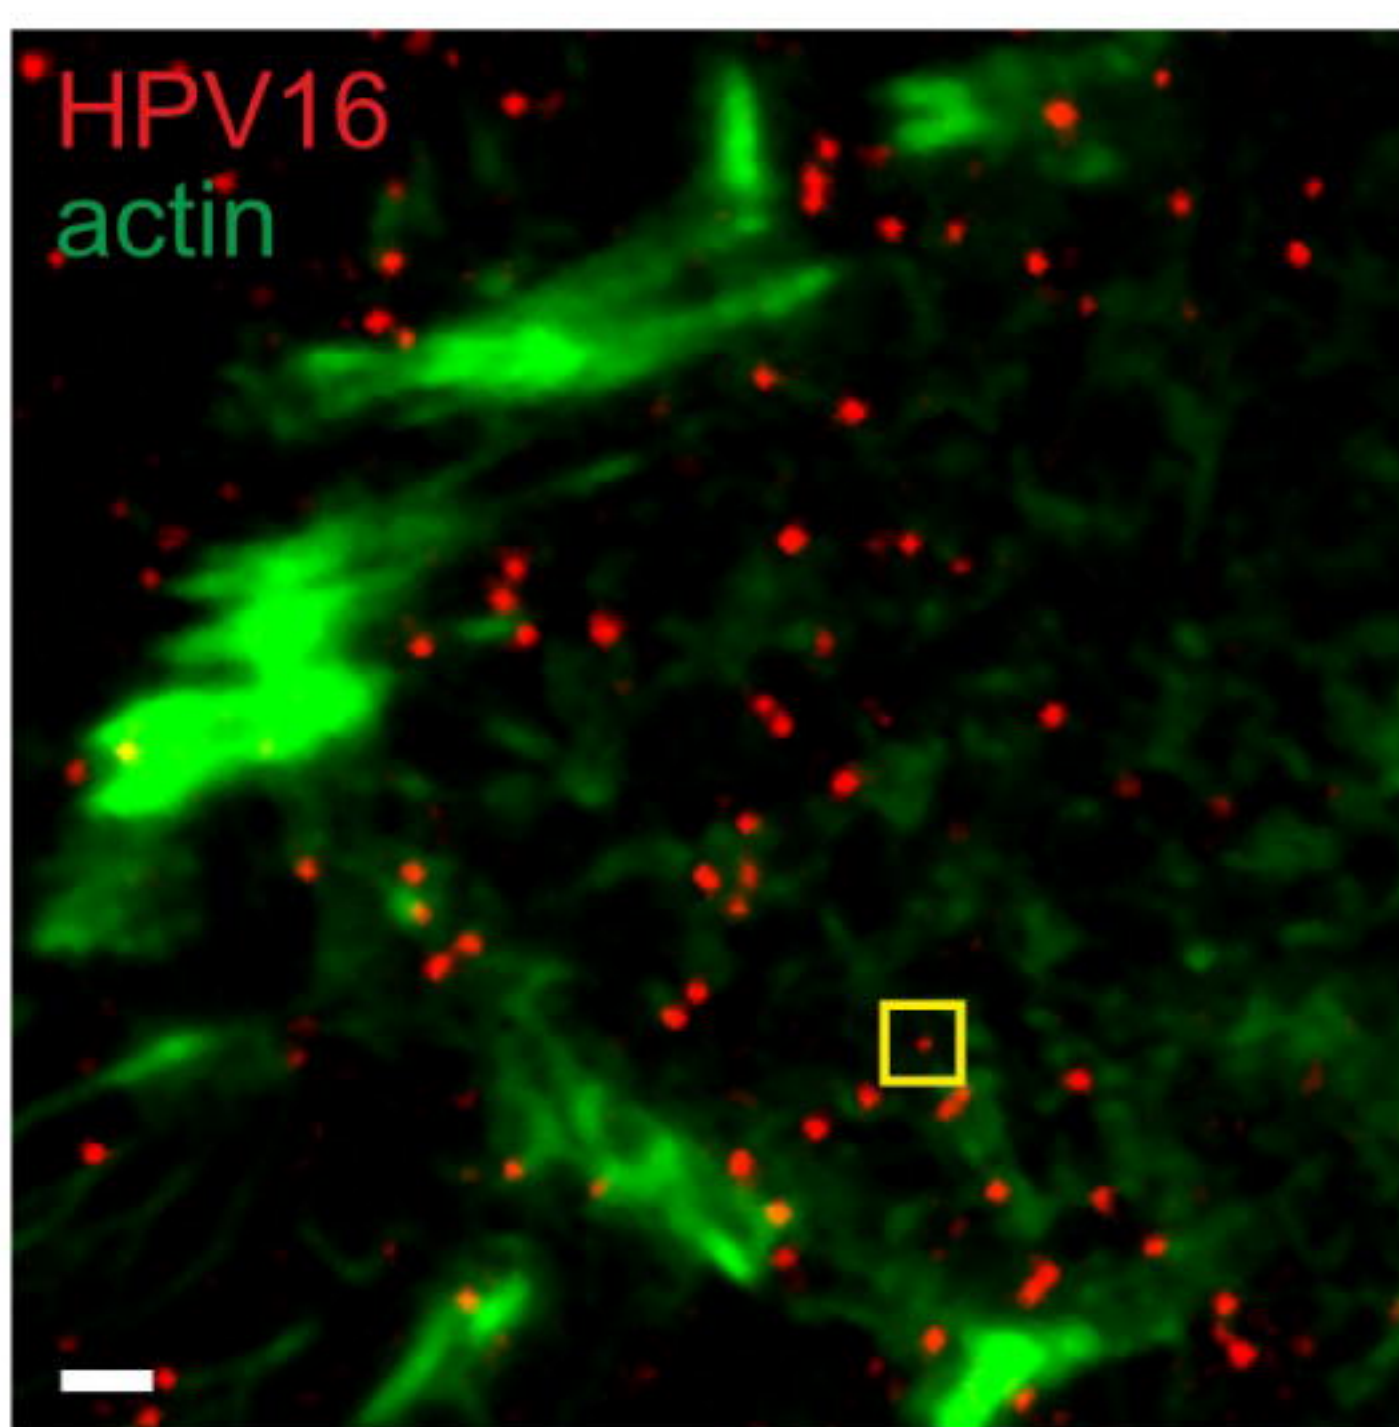

virus internalization

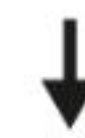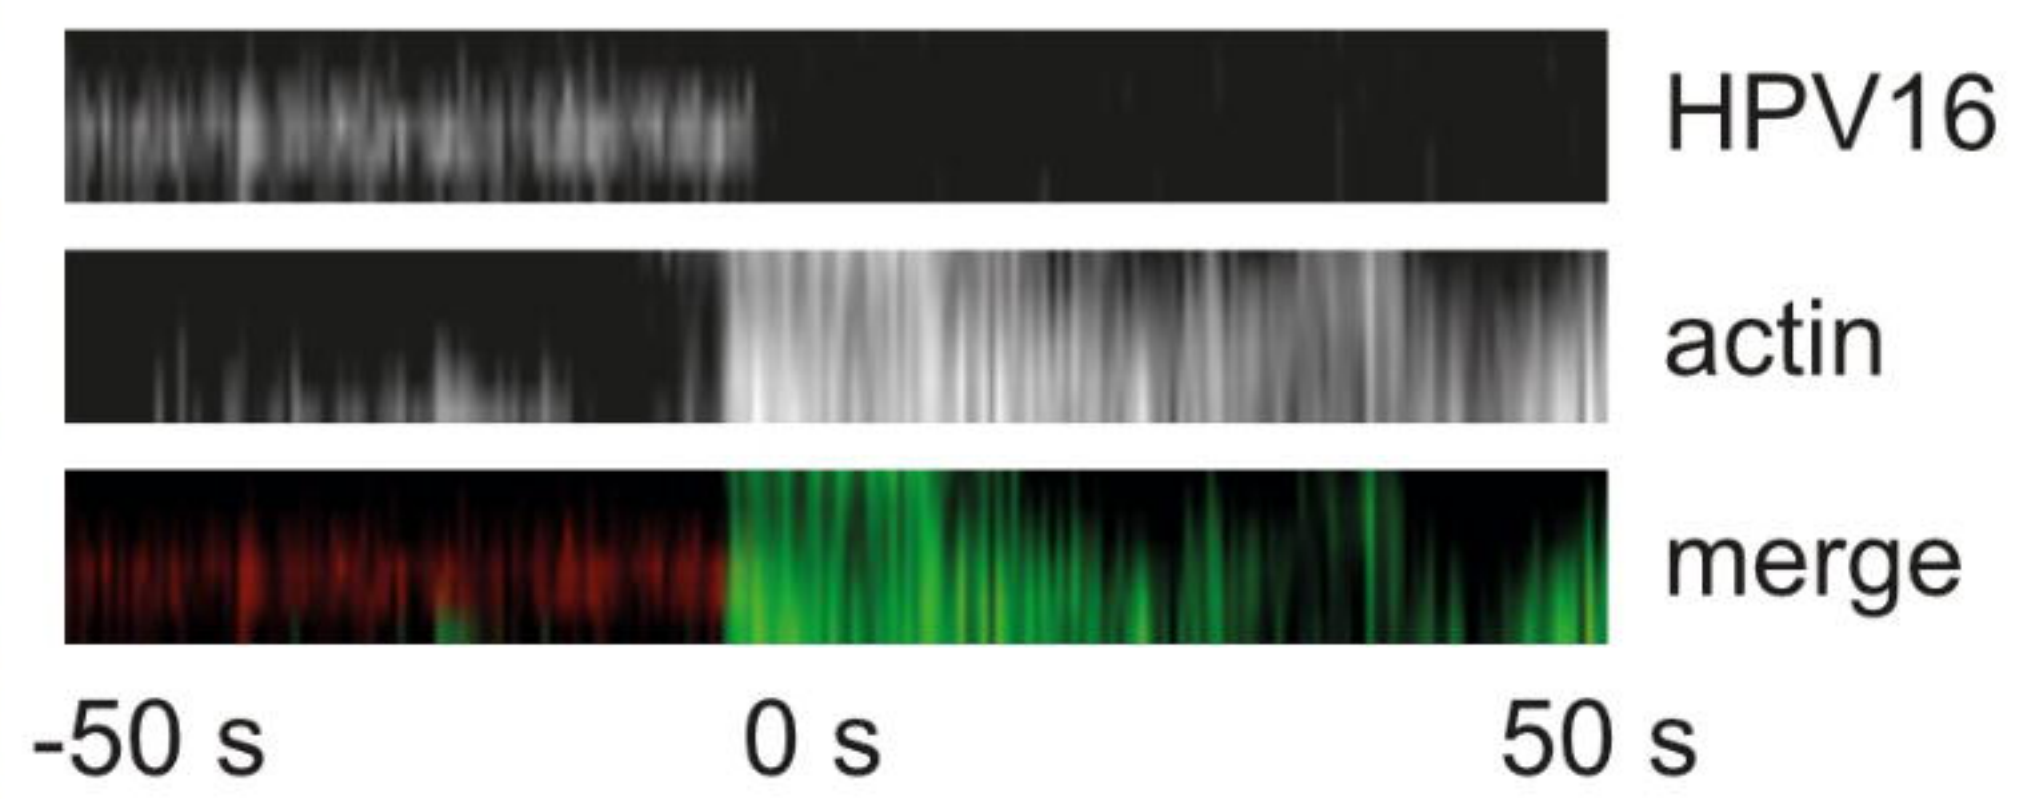**C**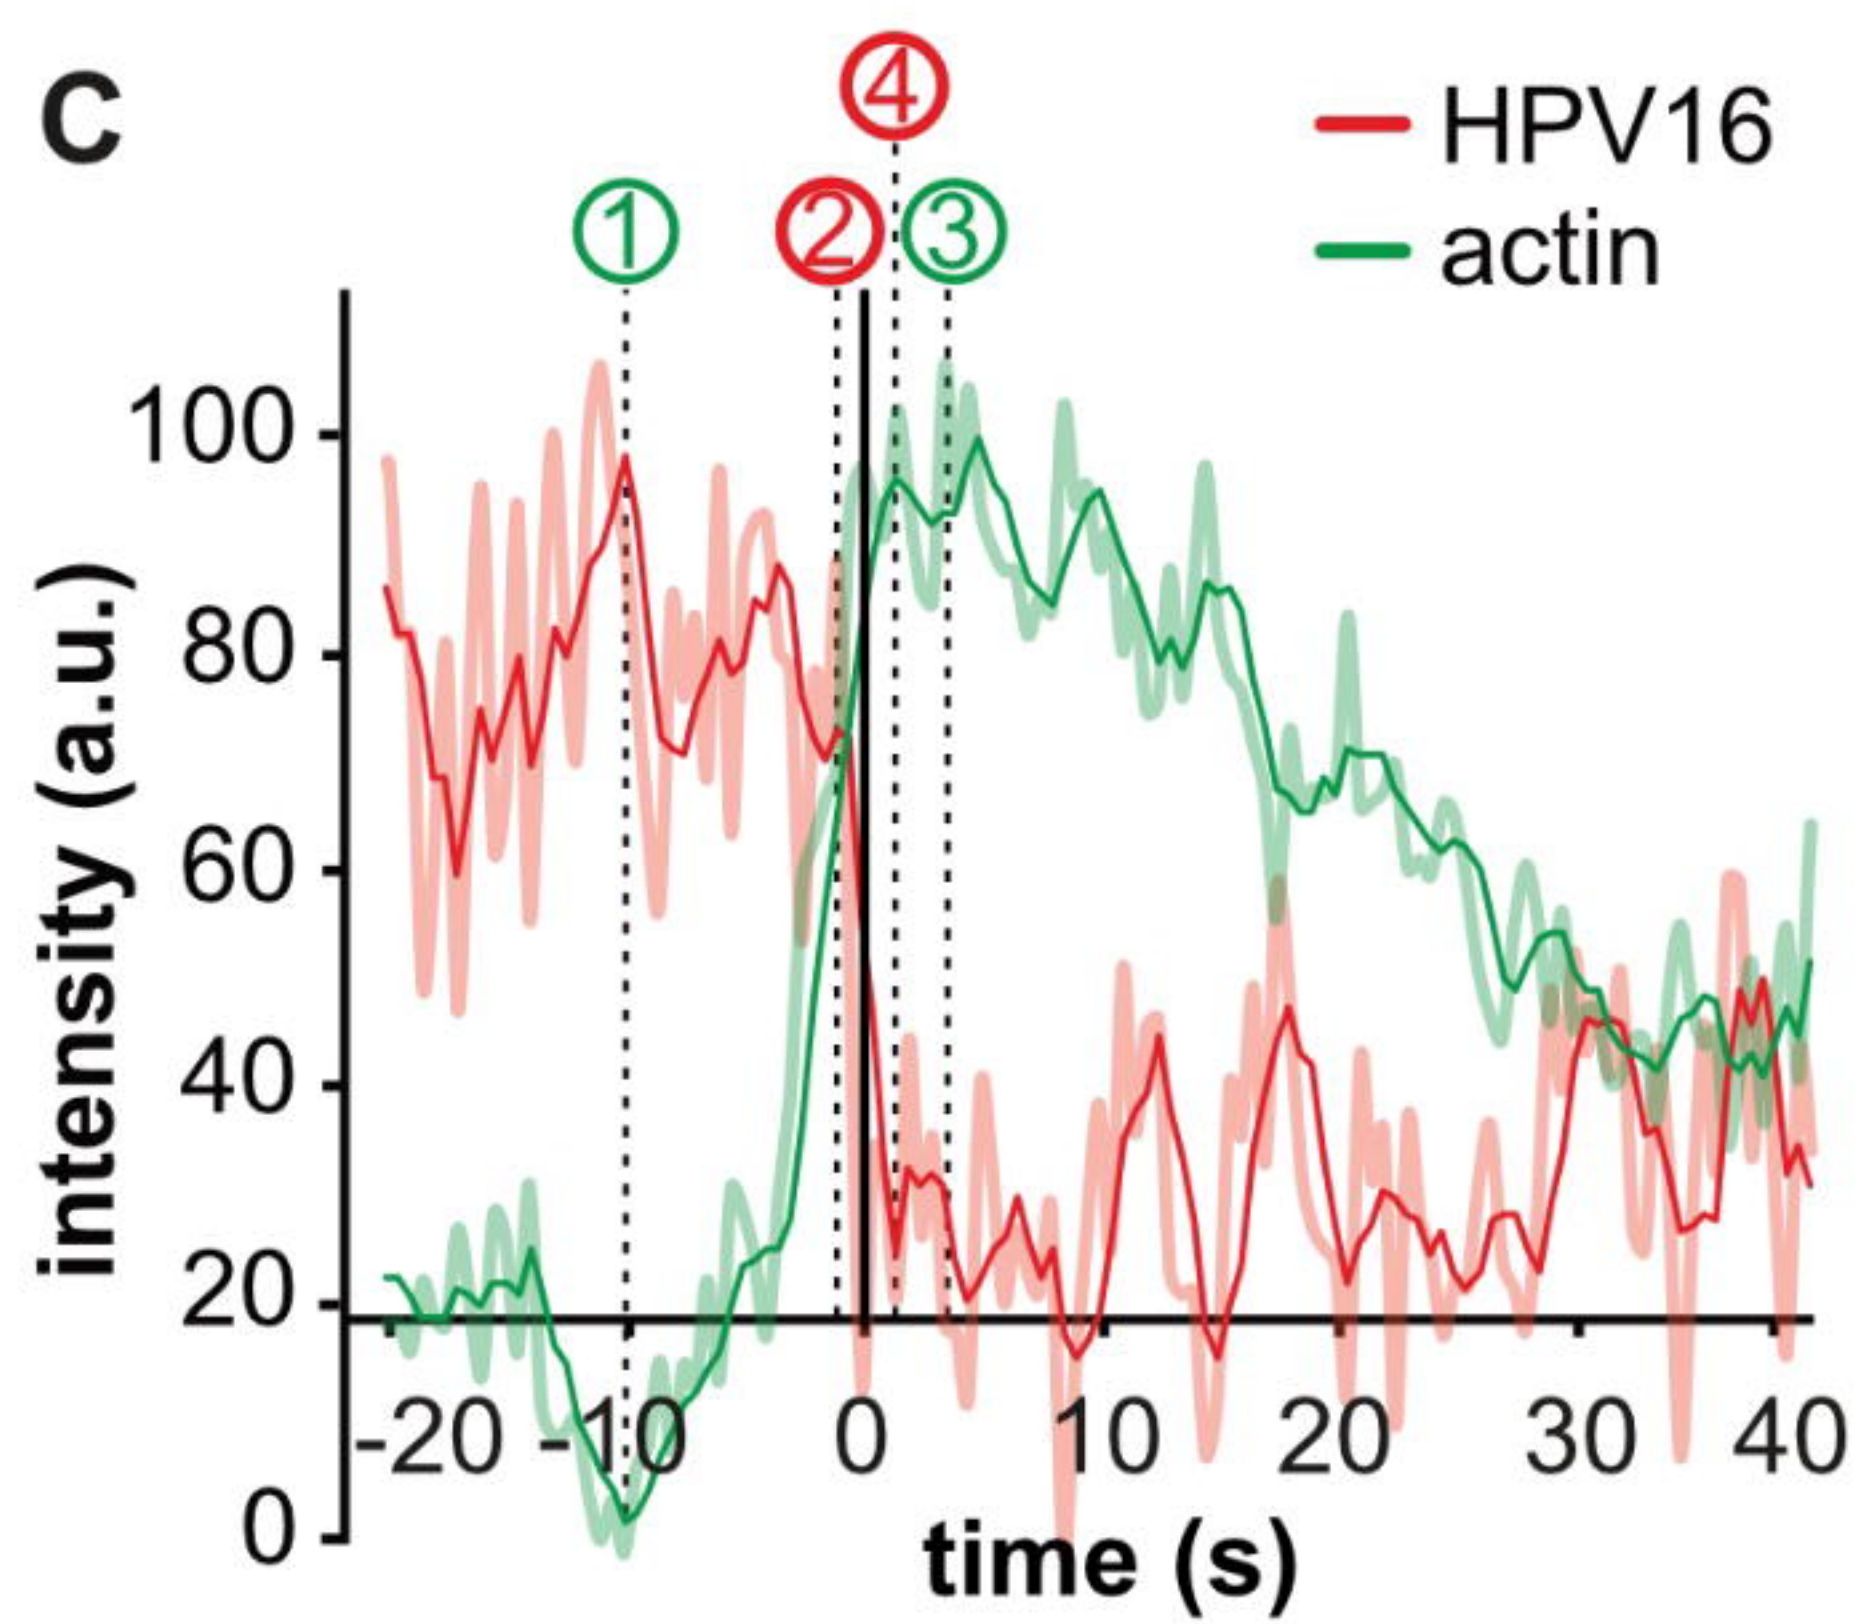**D**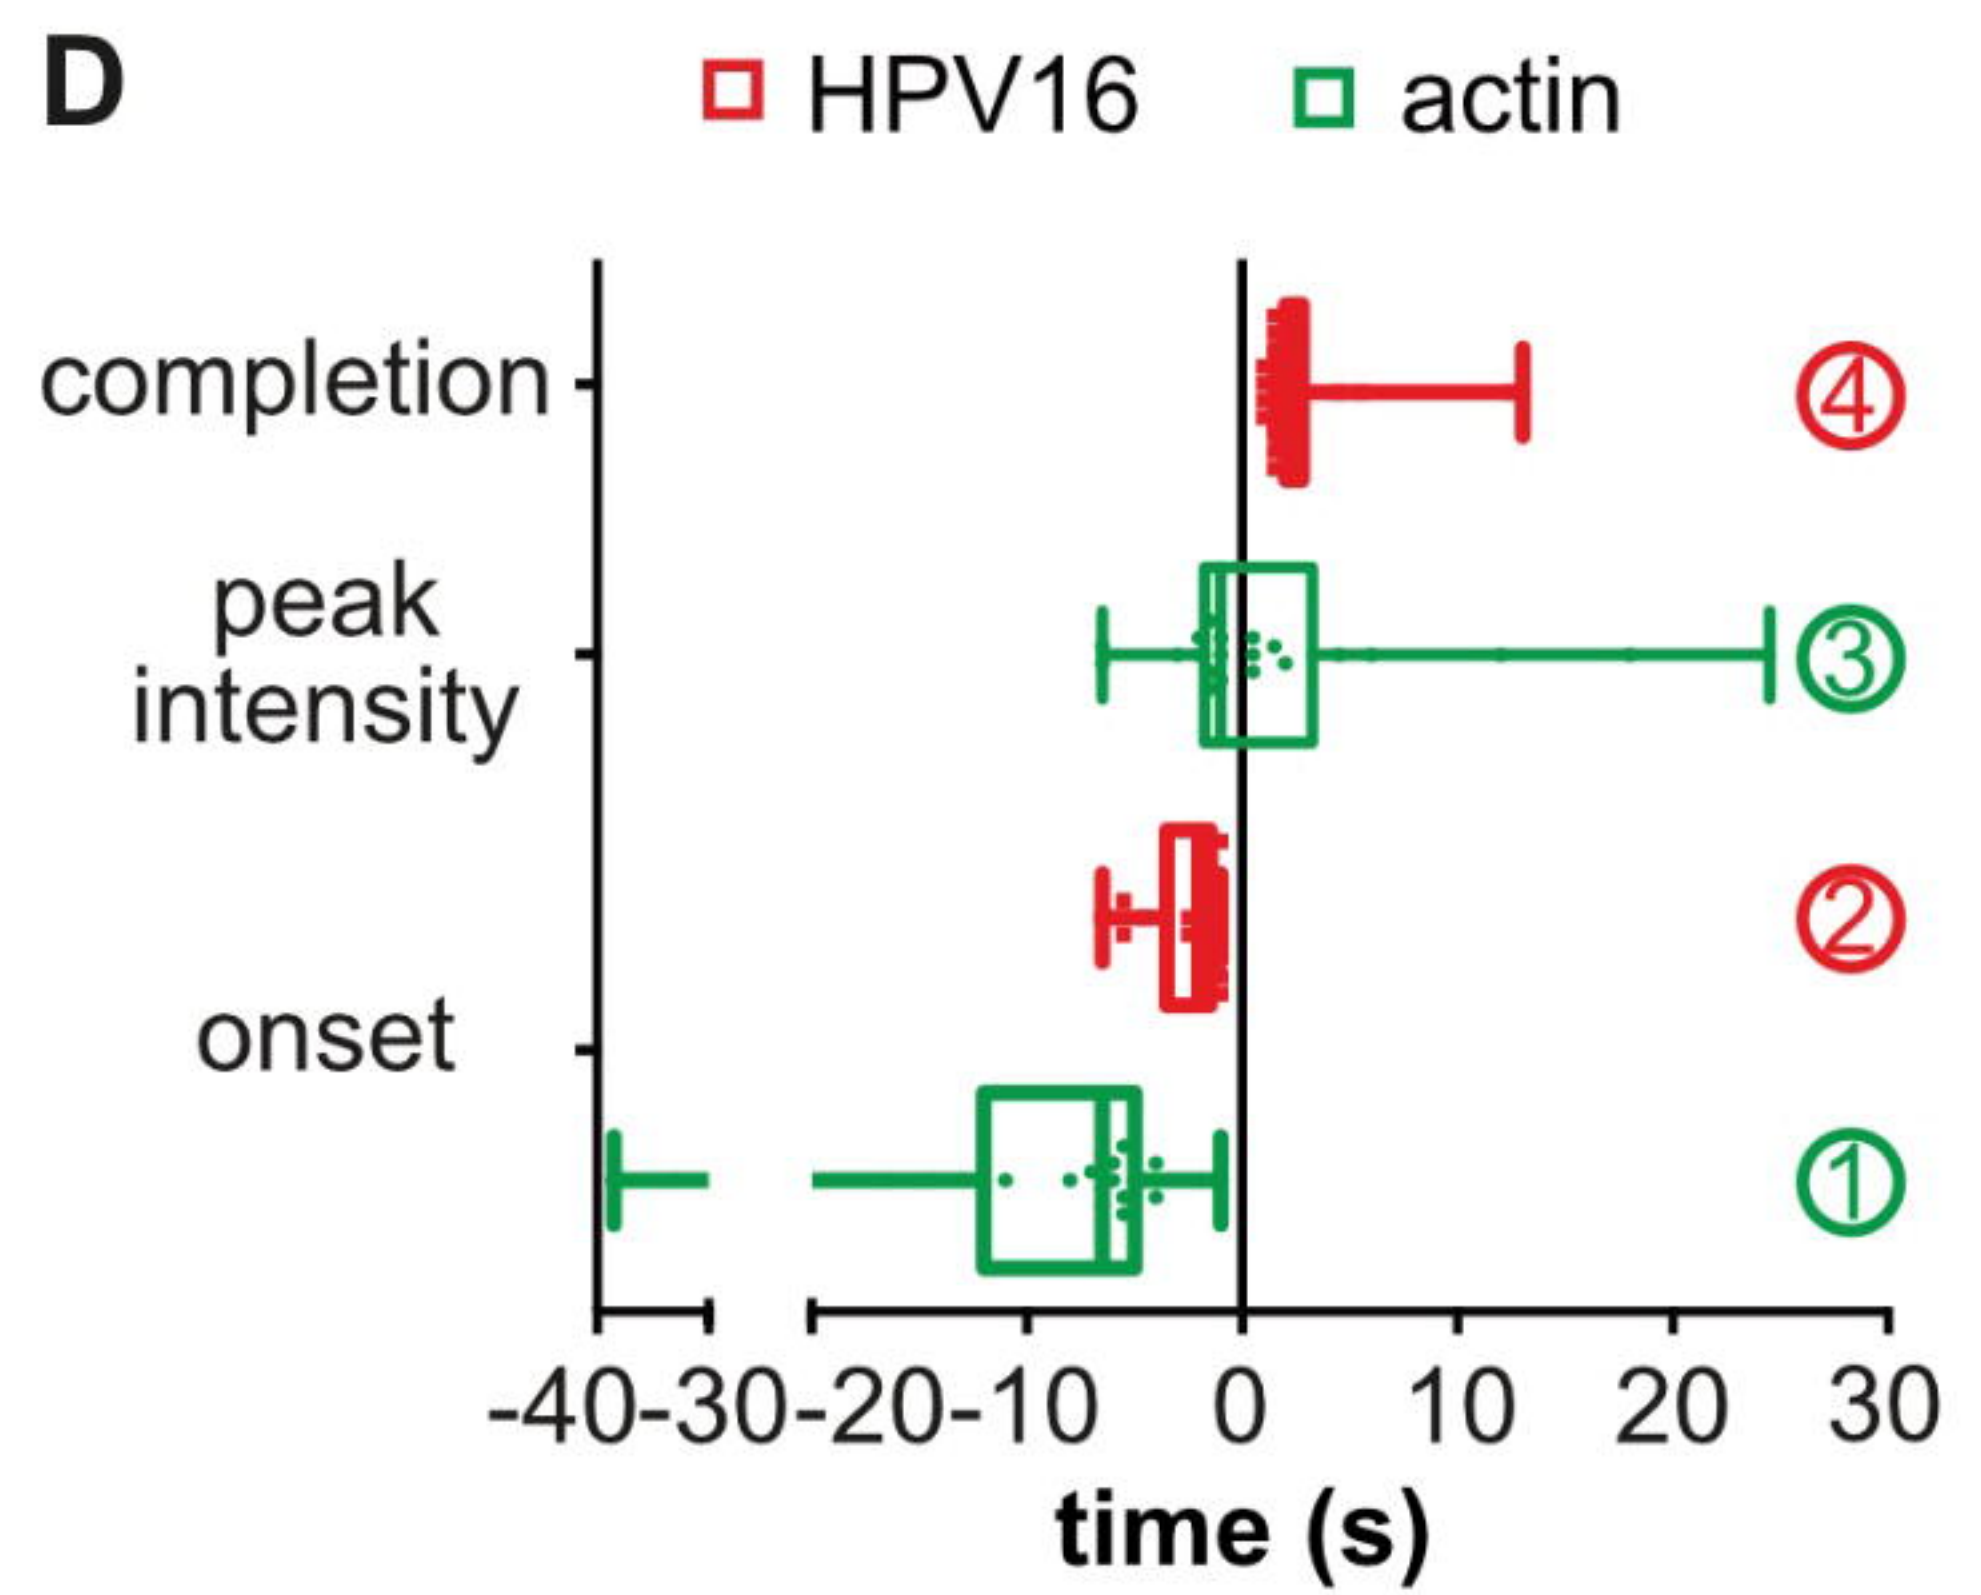

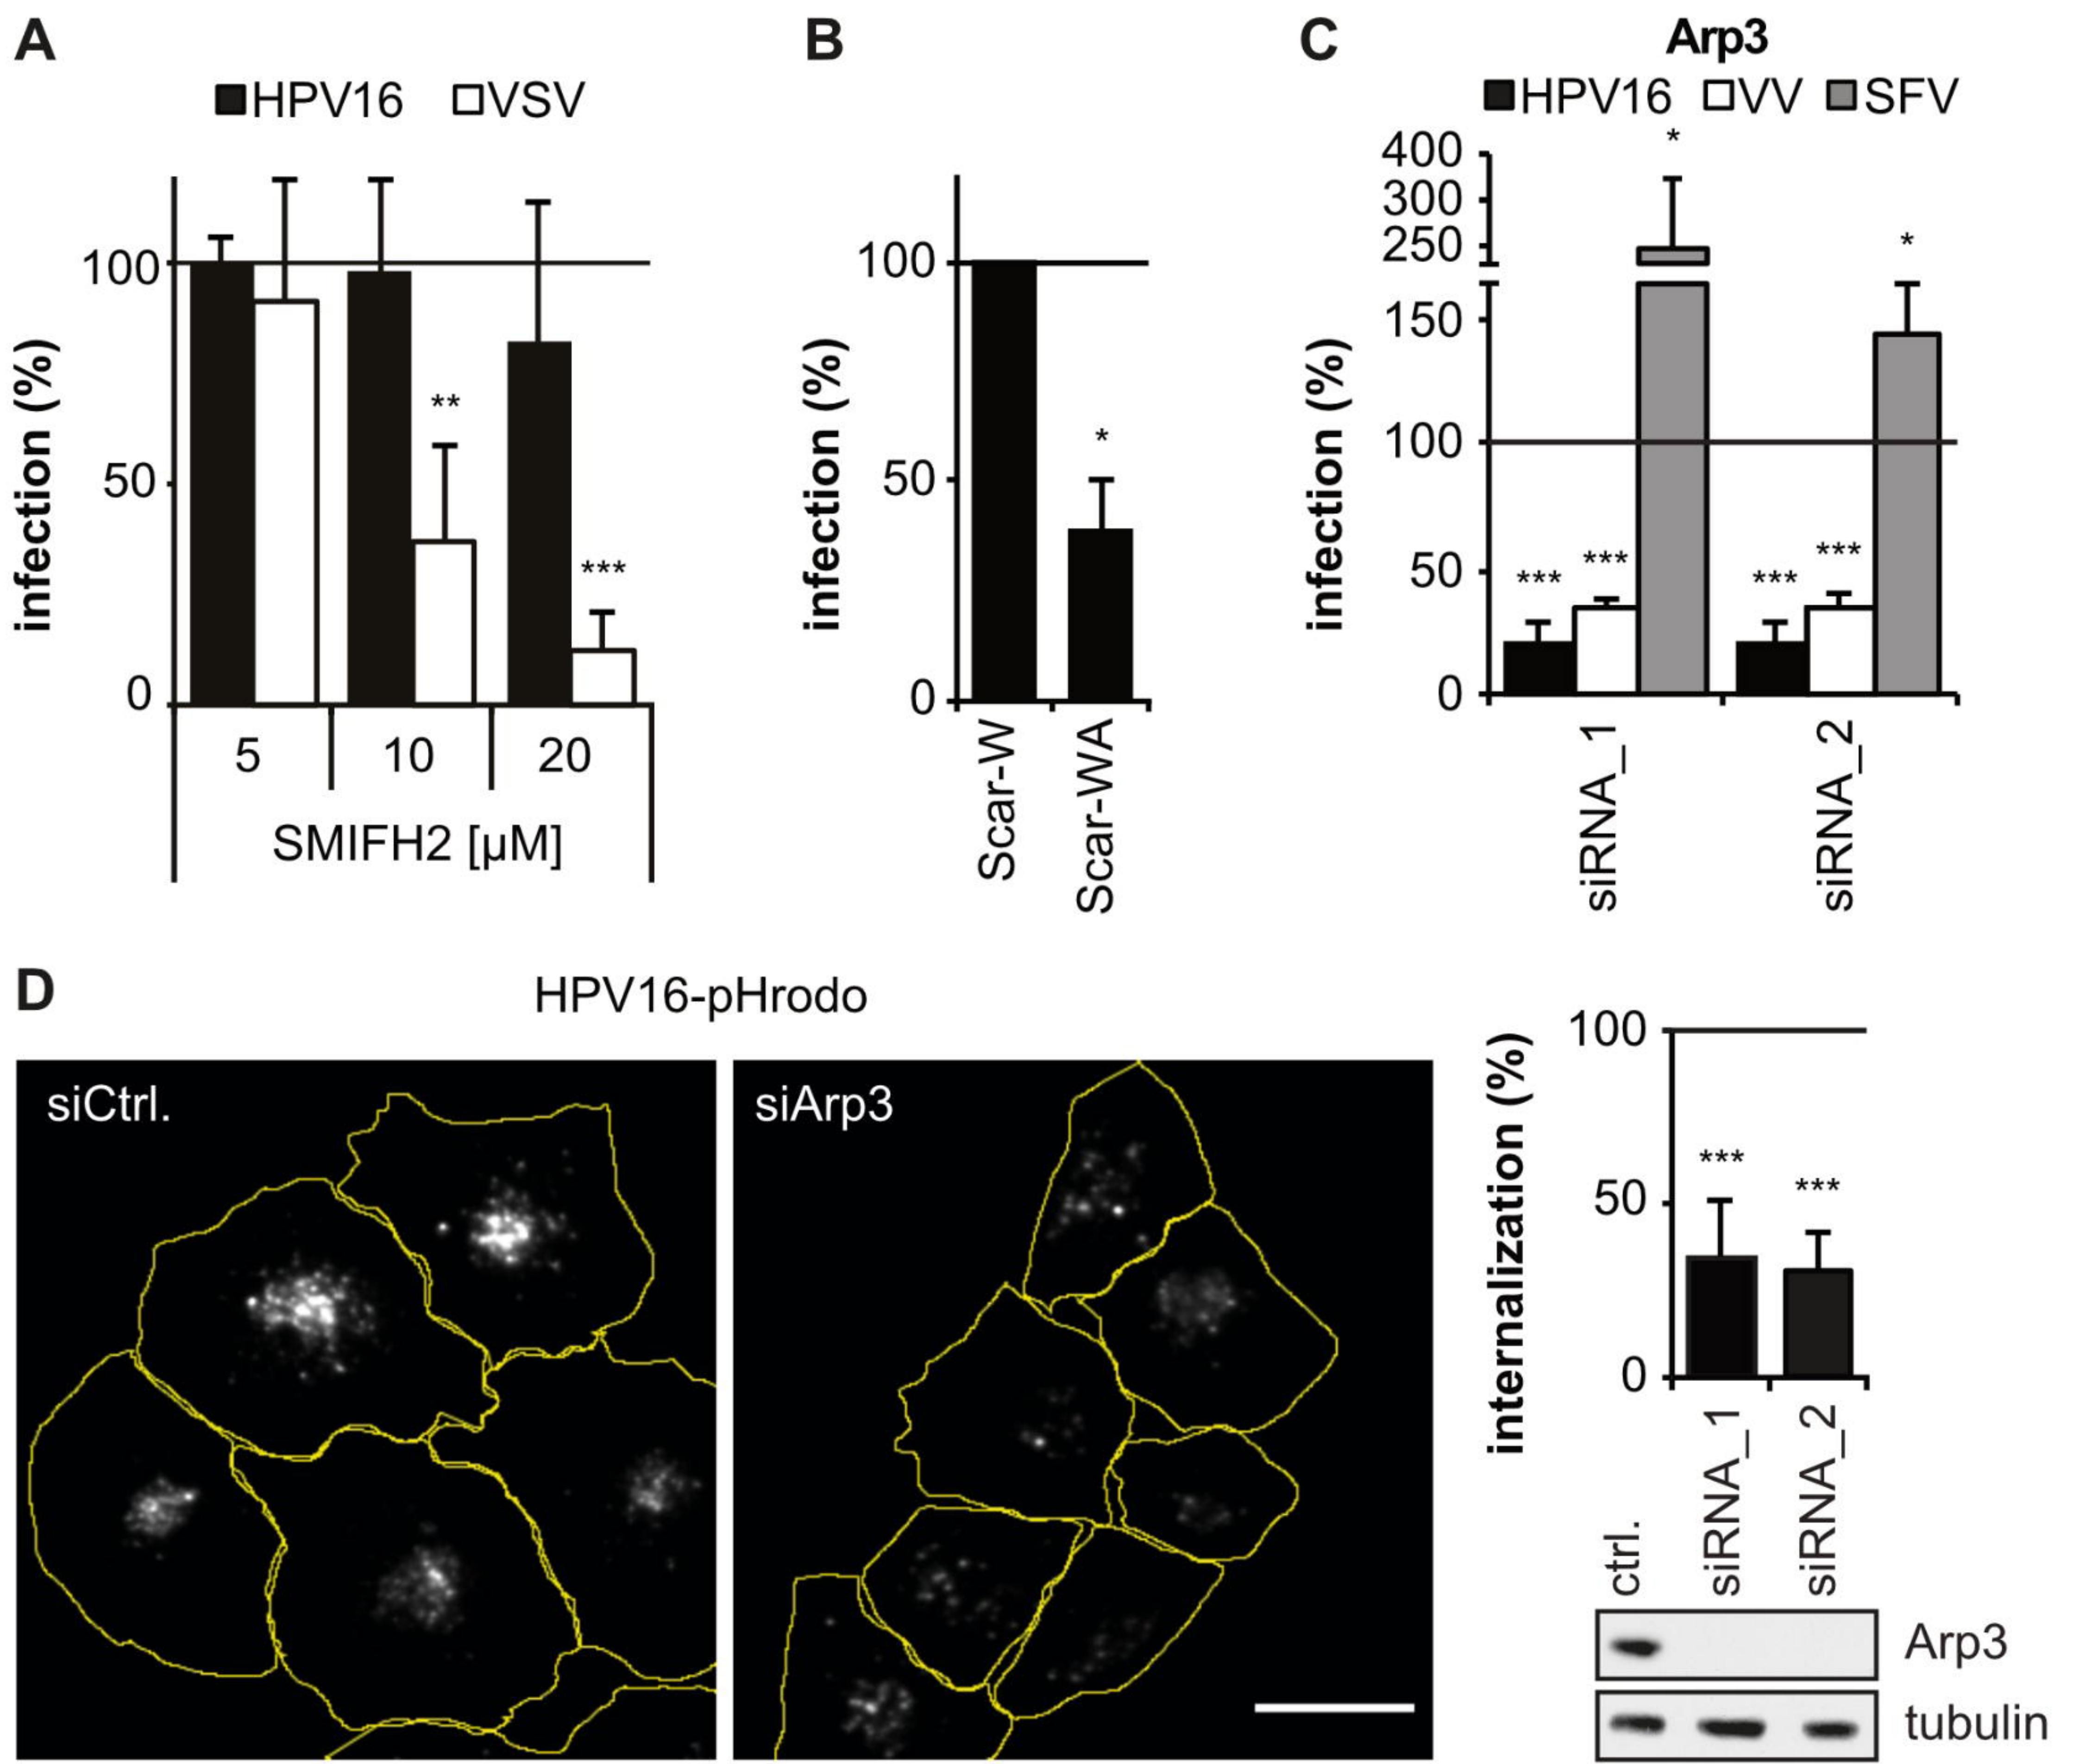

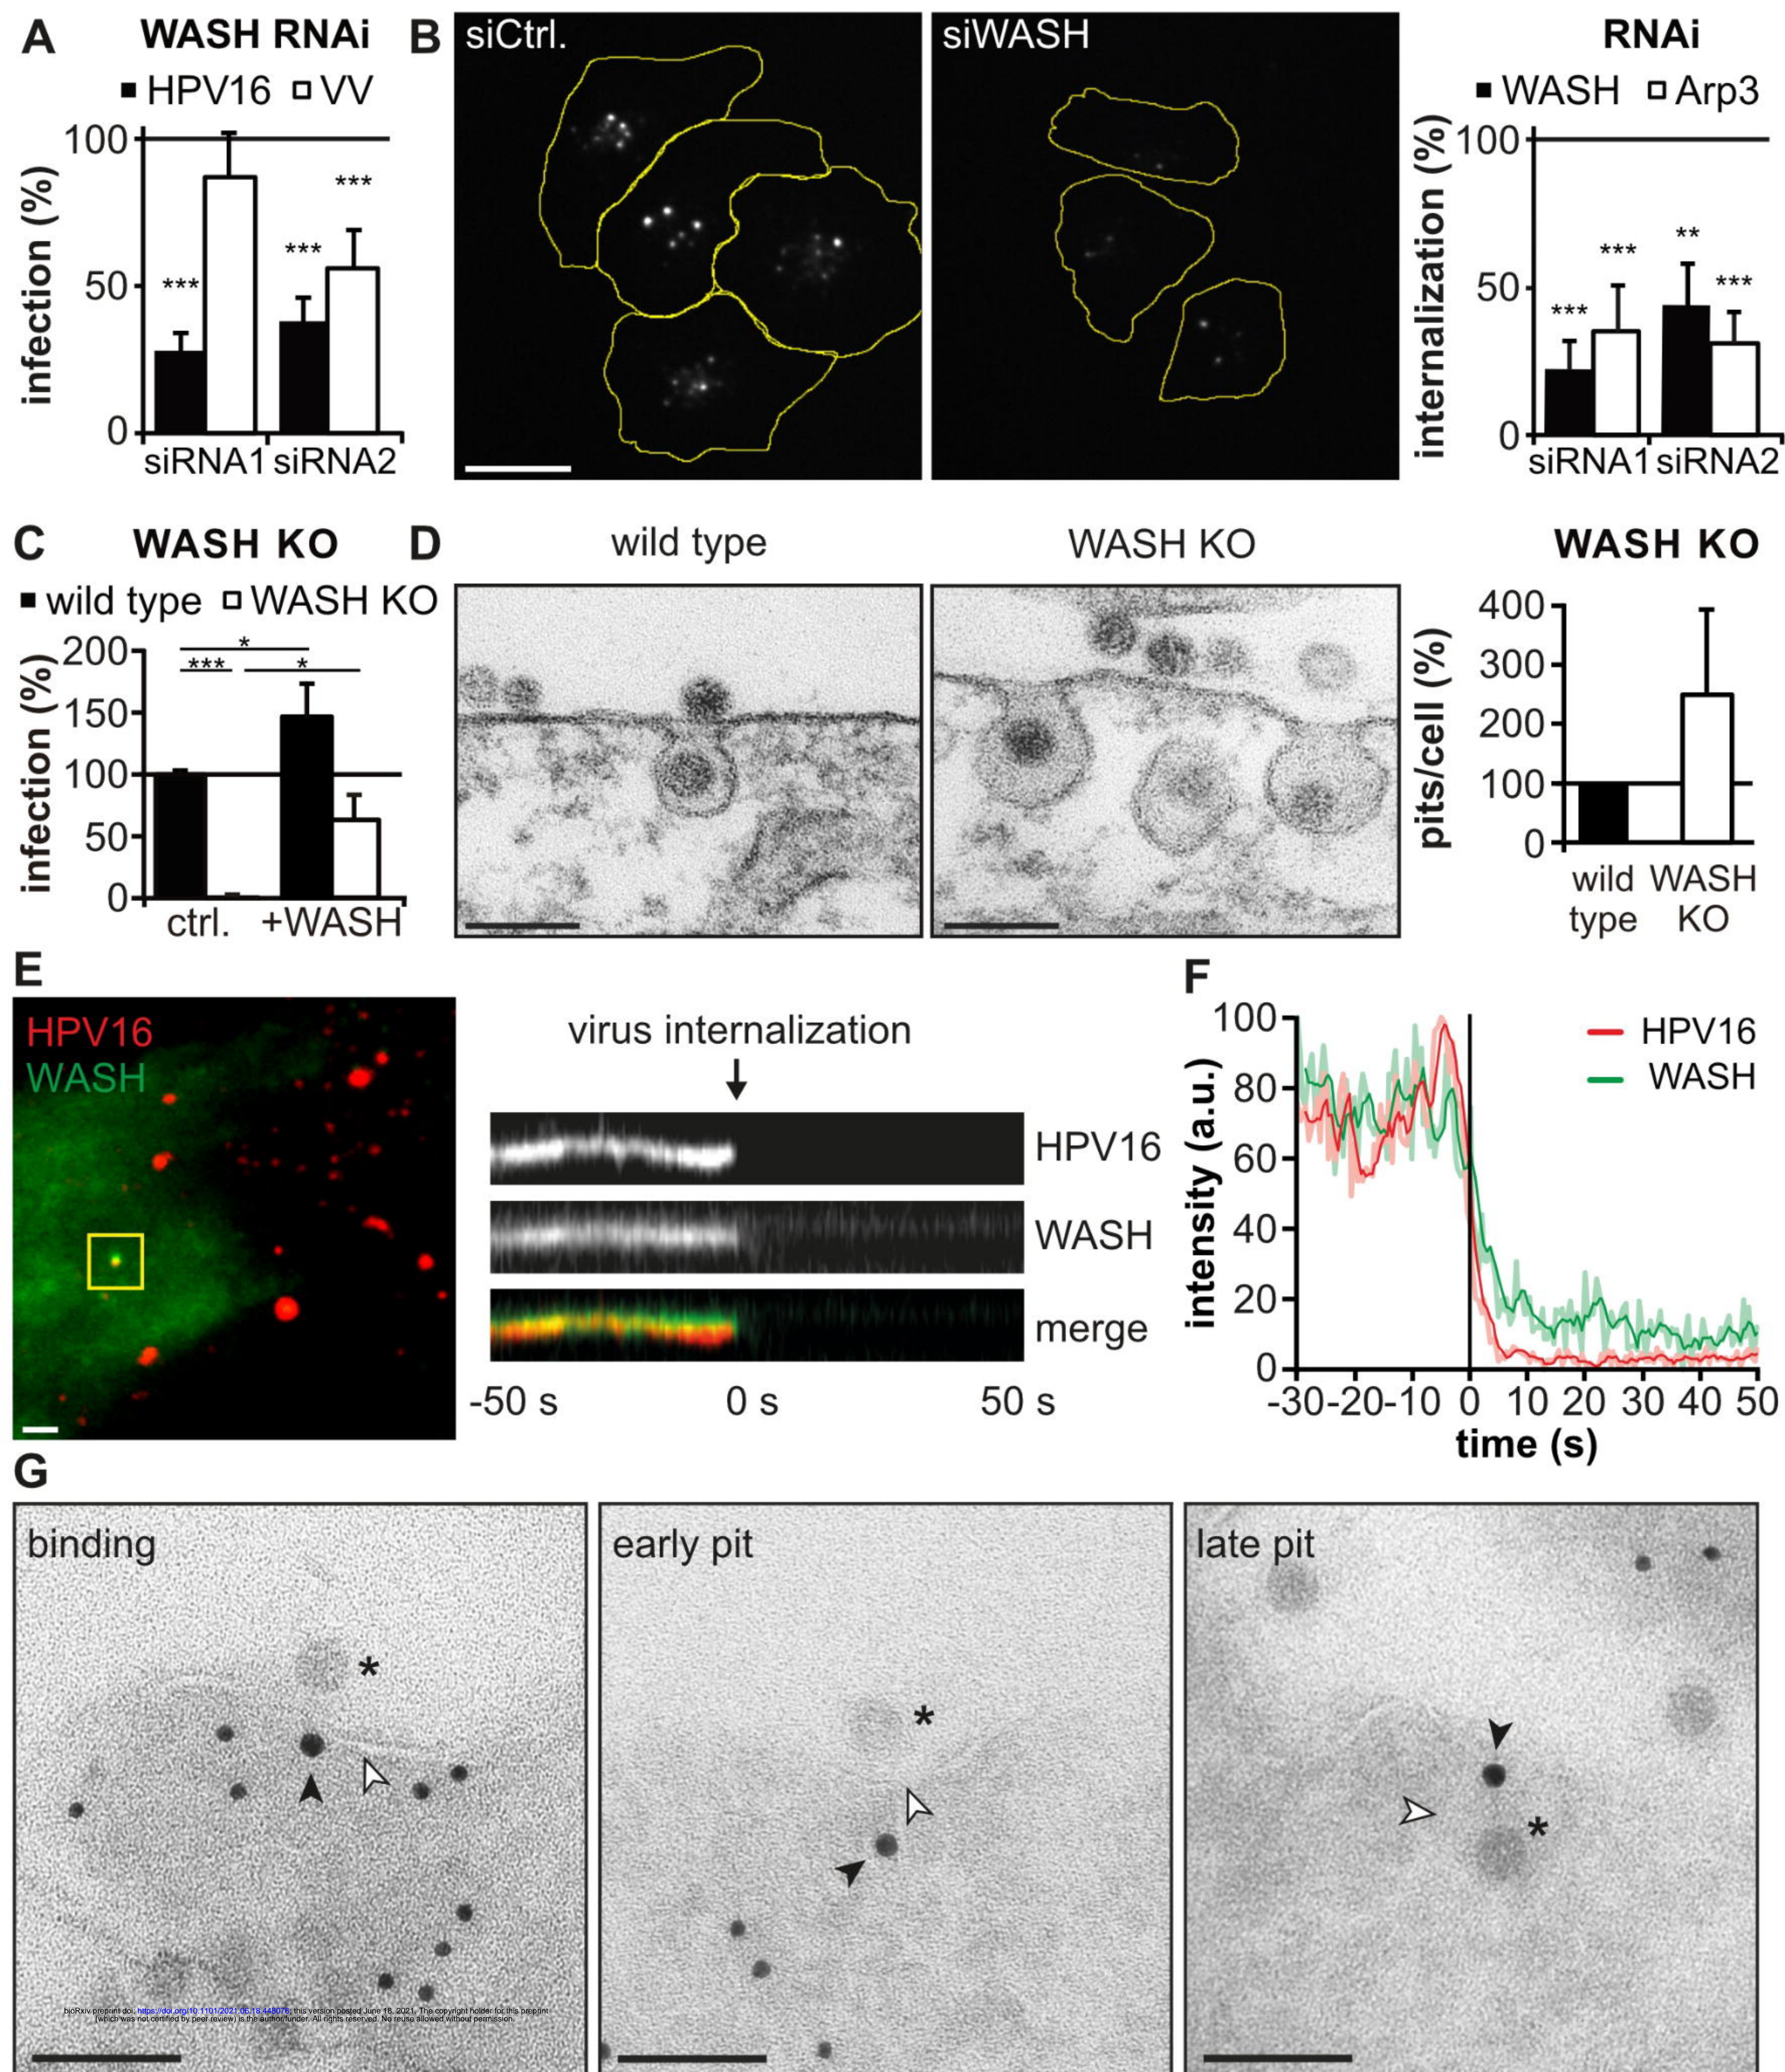

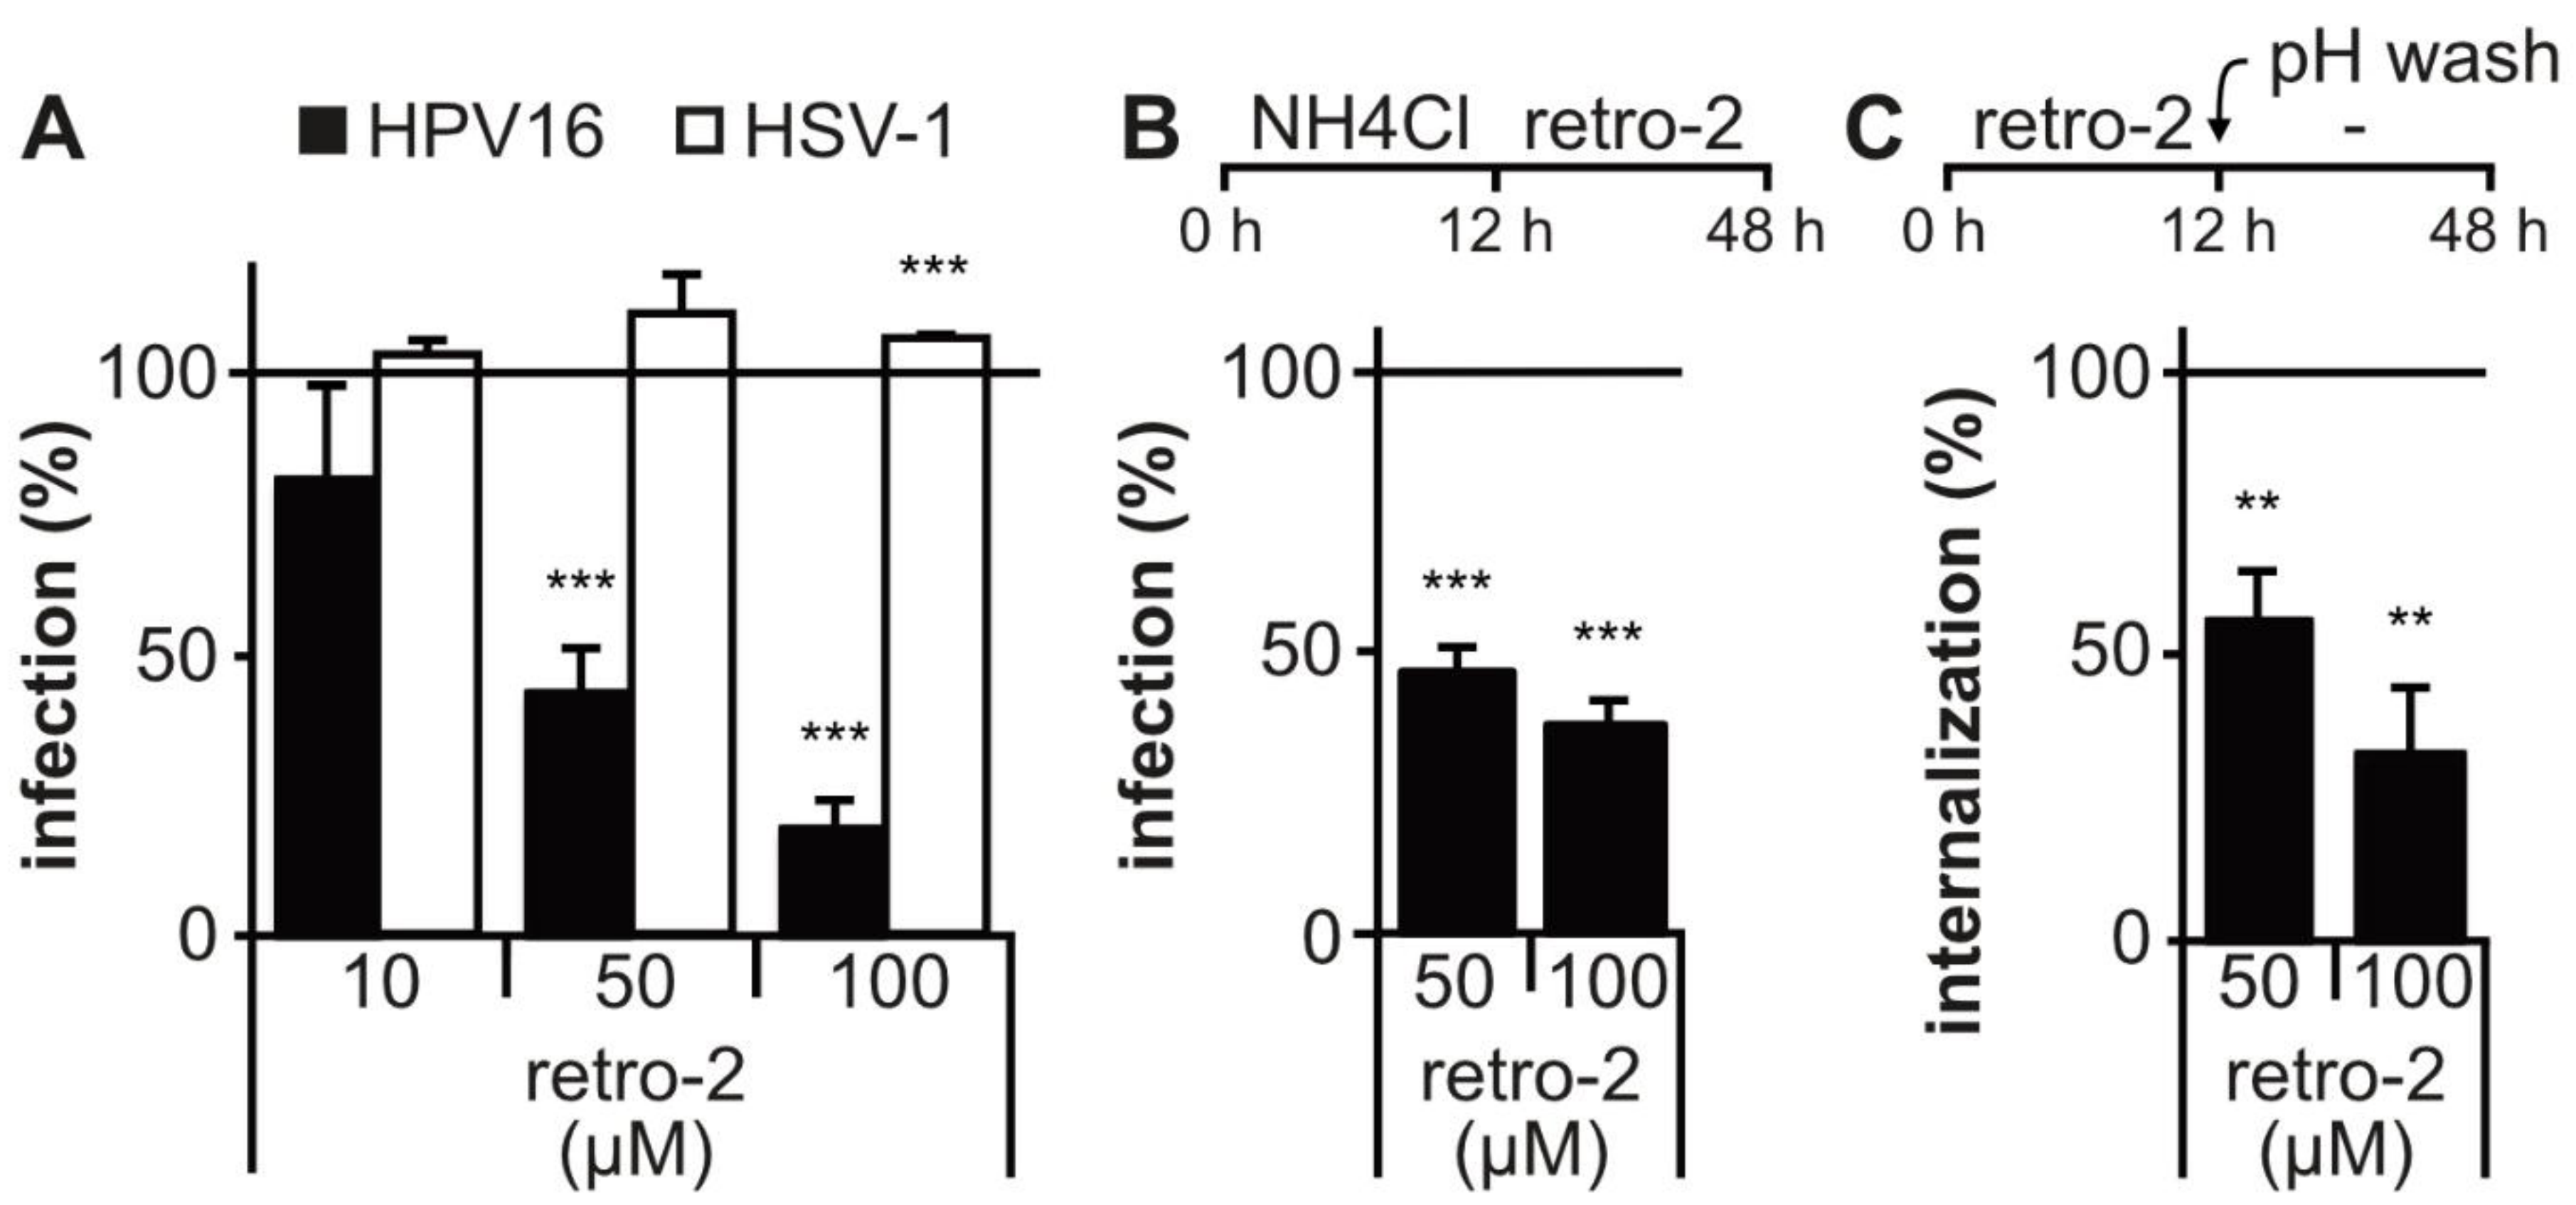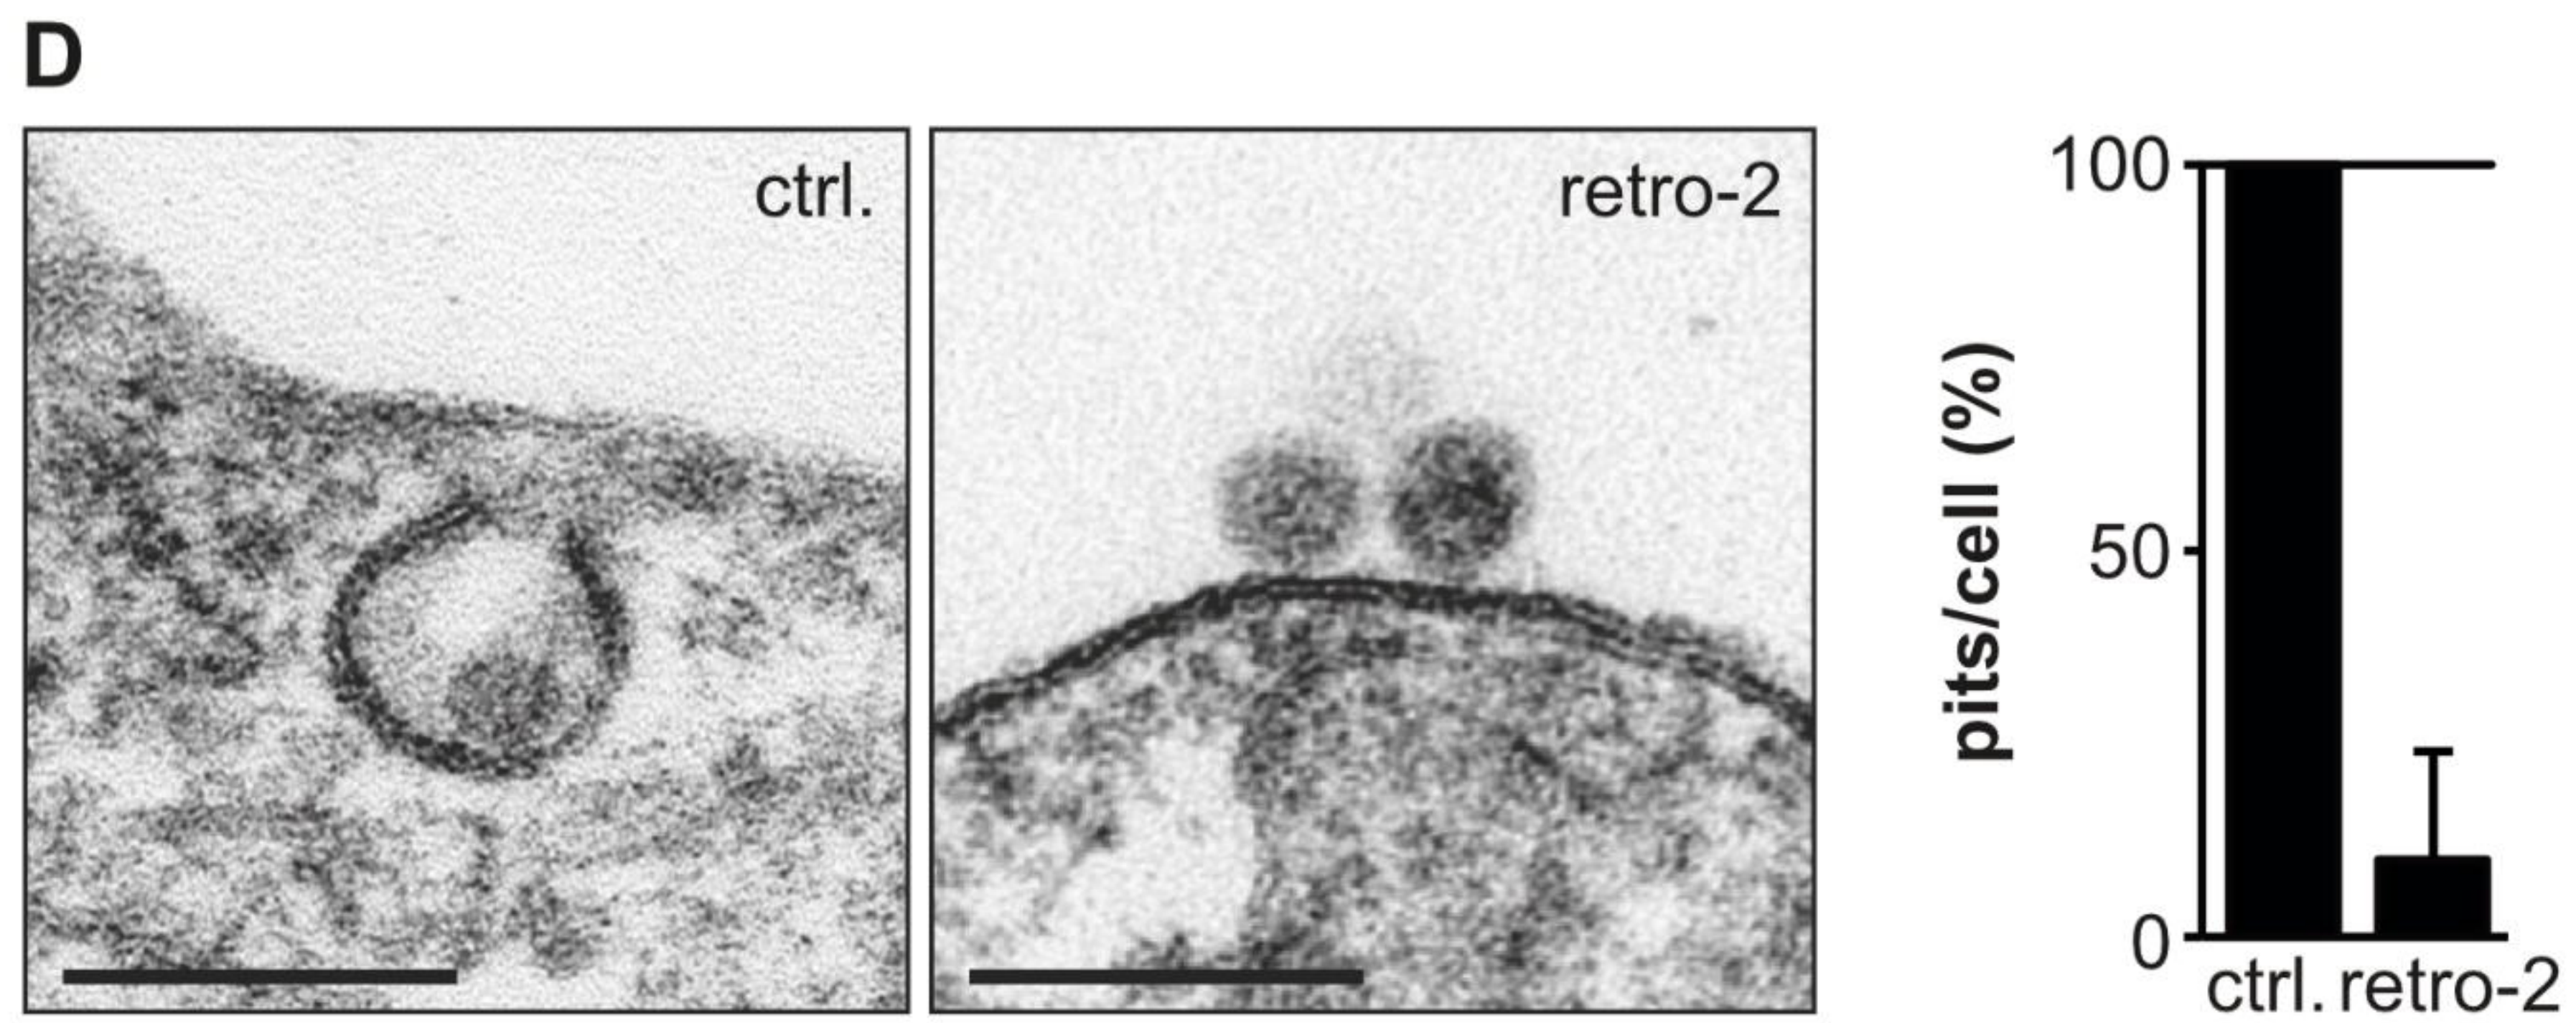

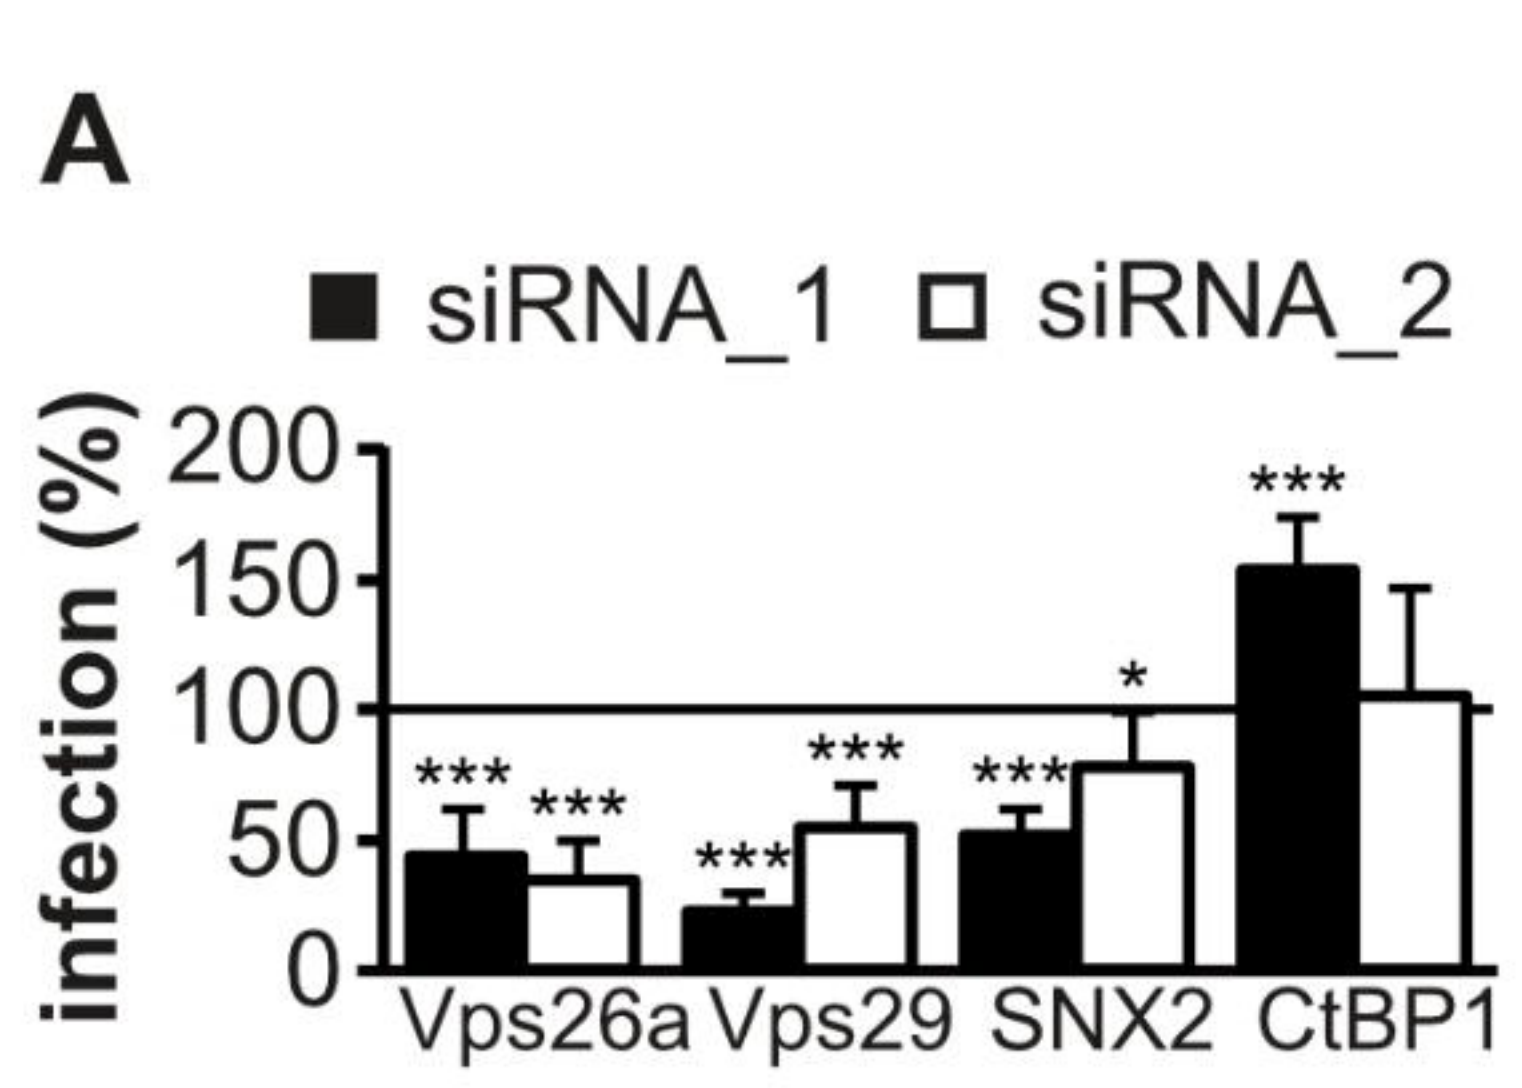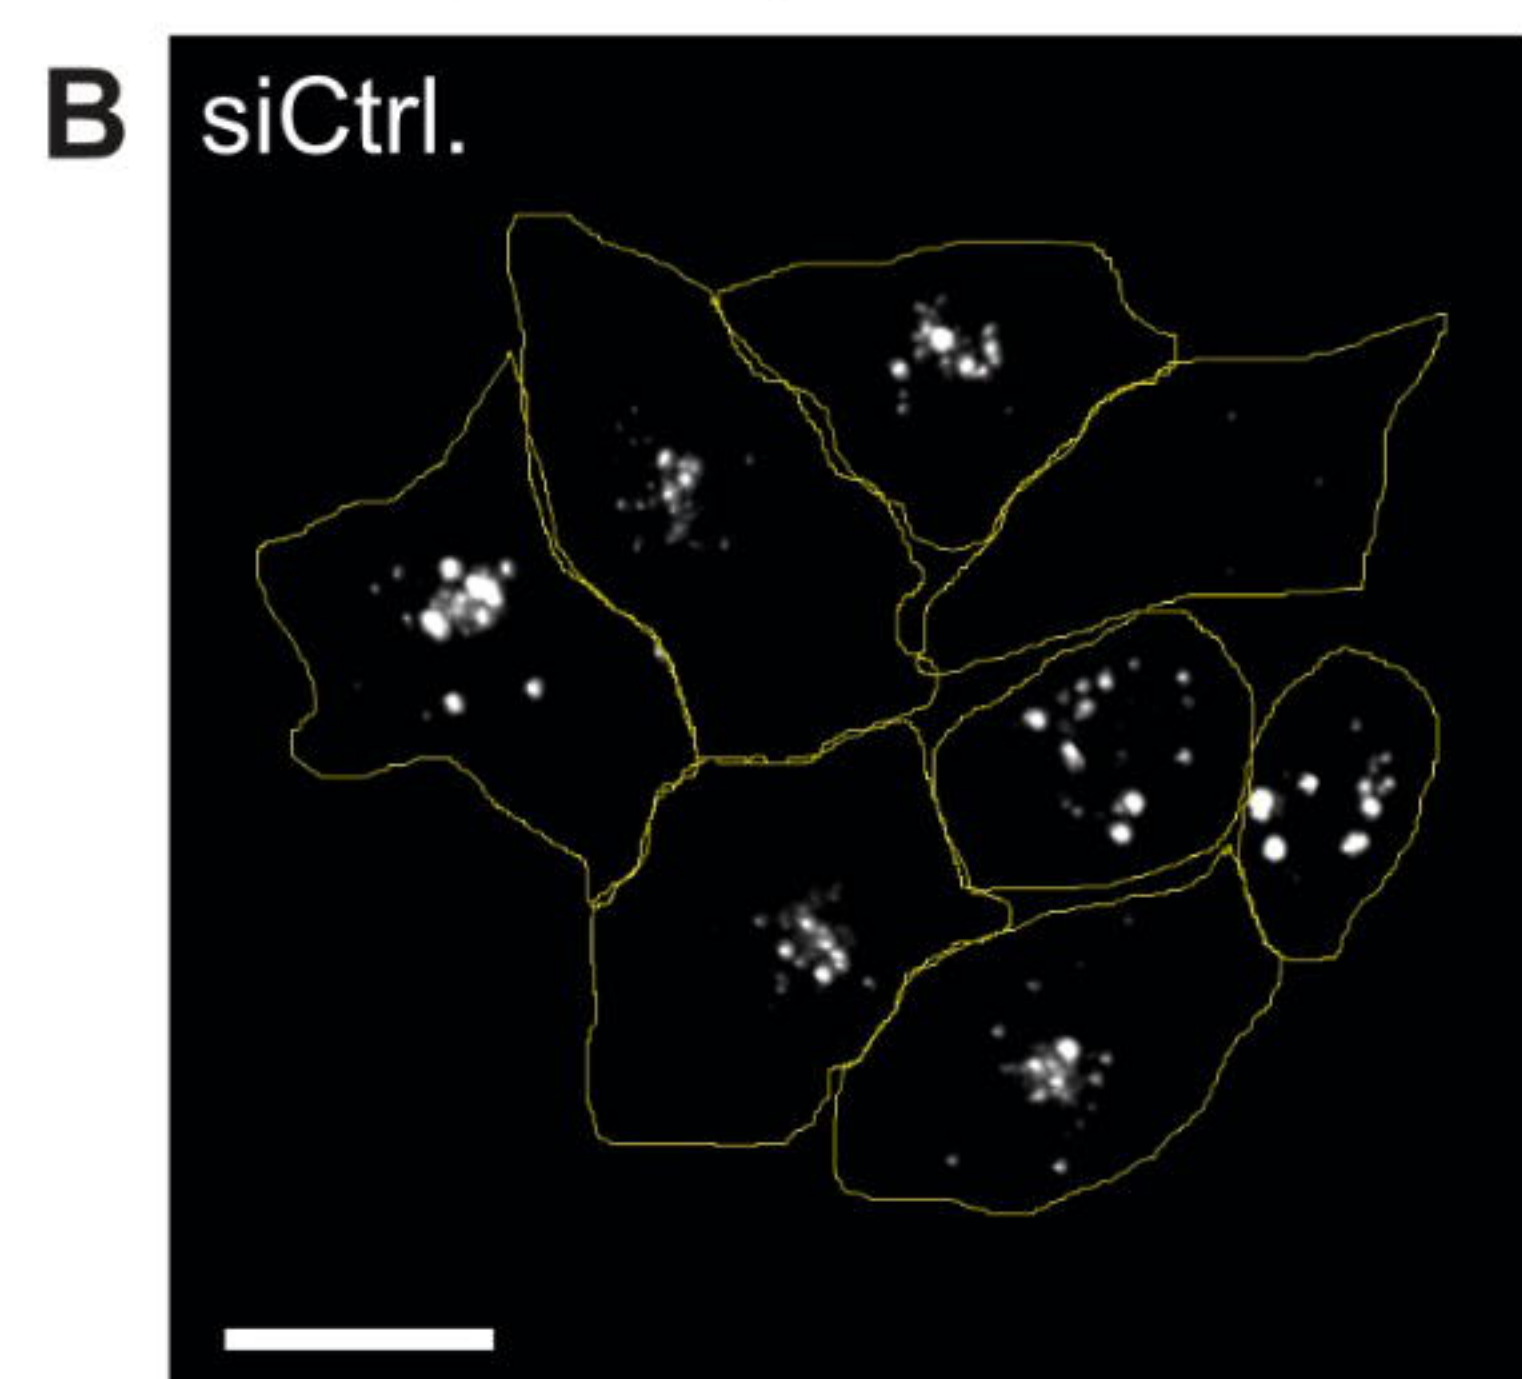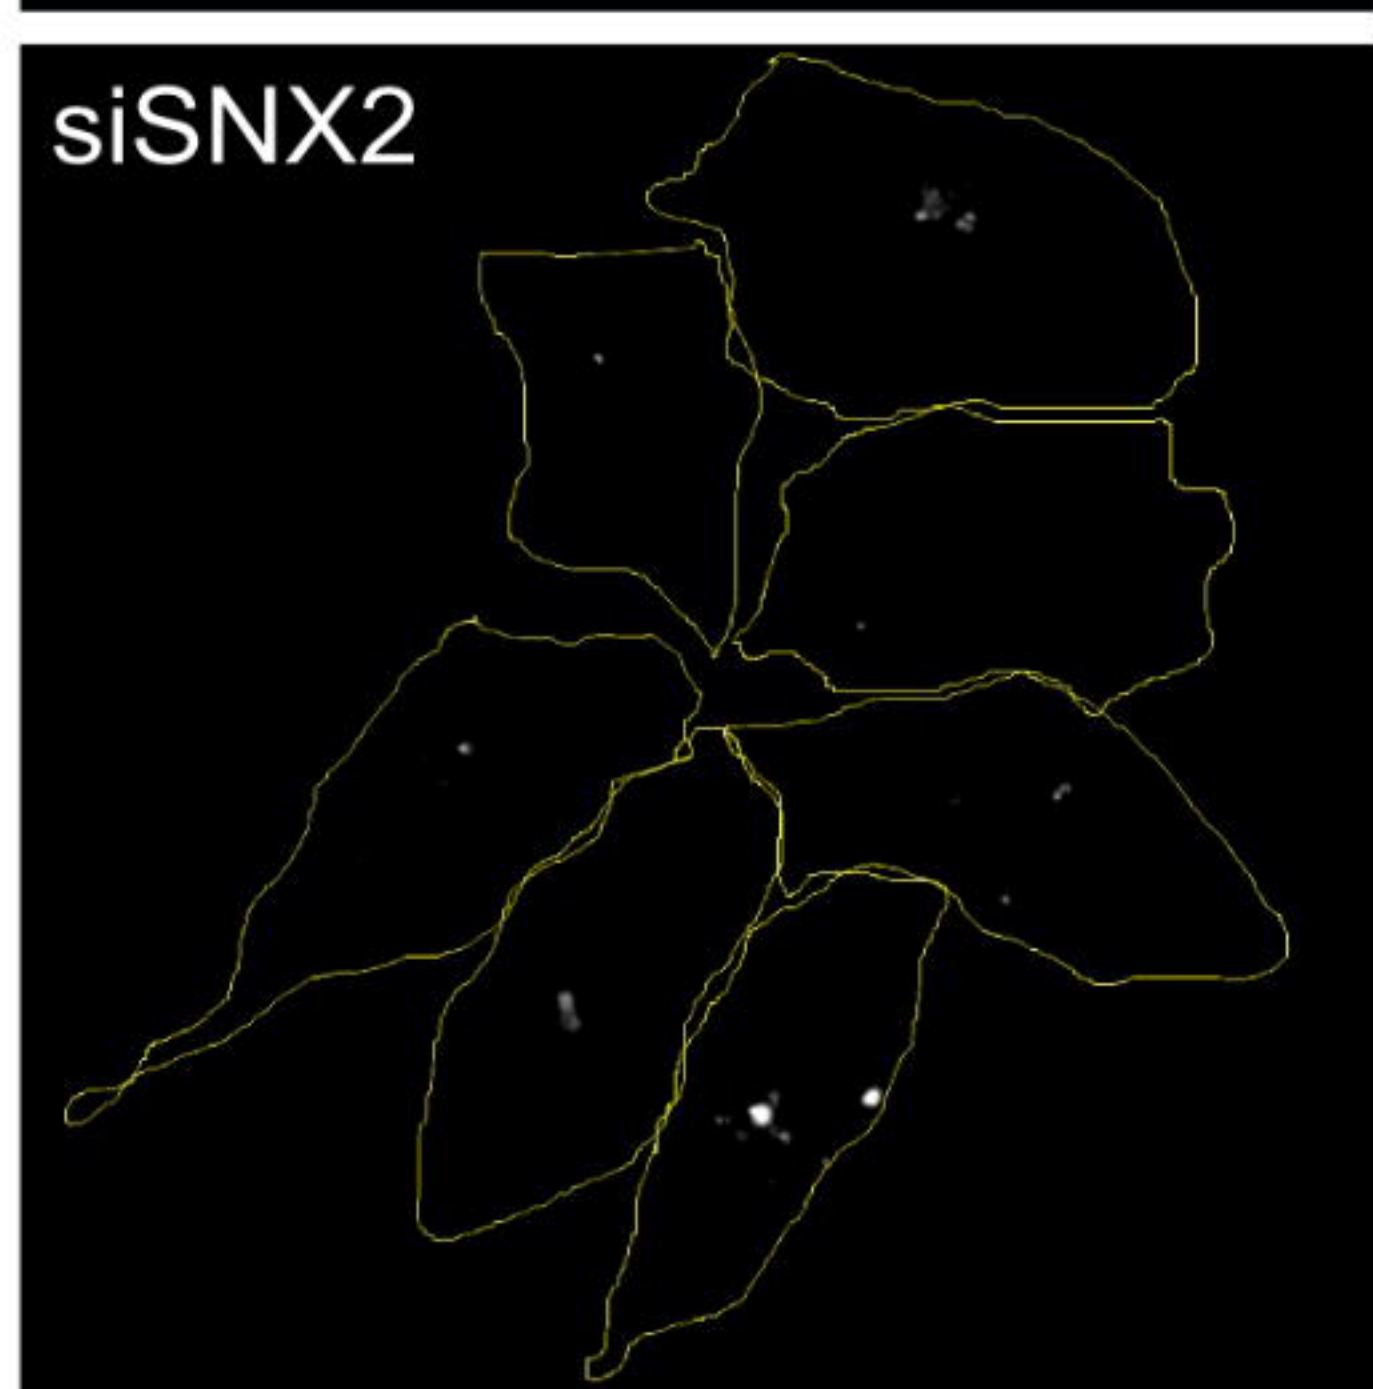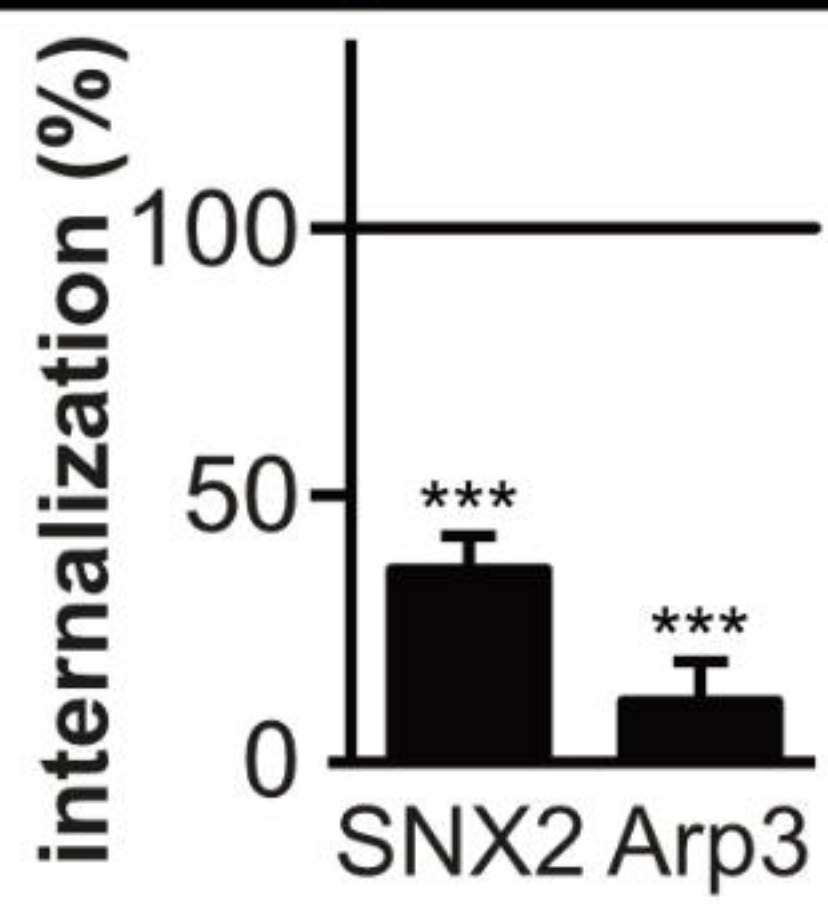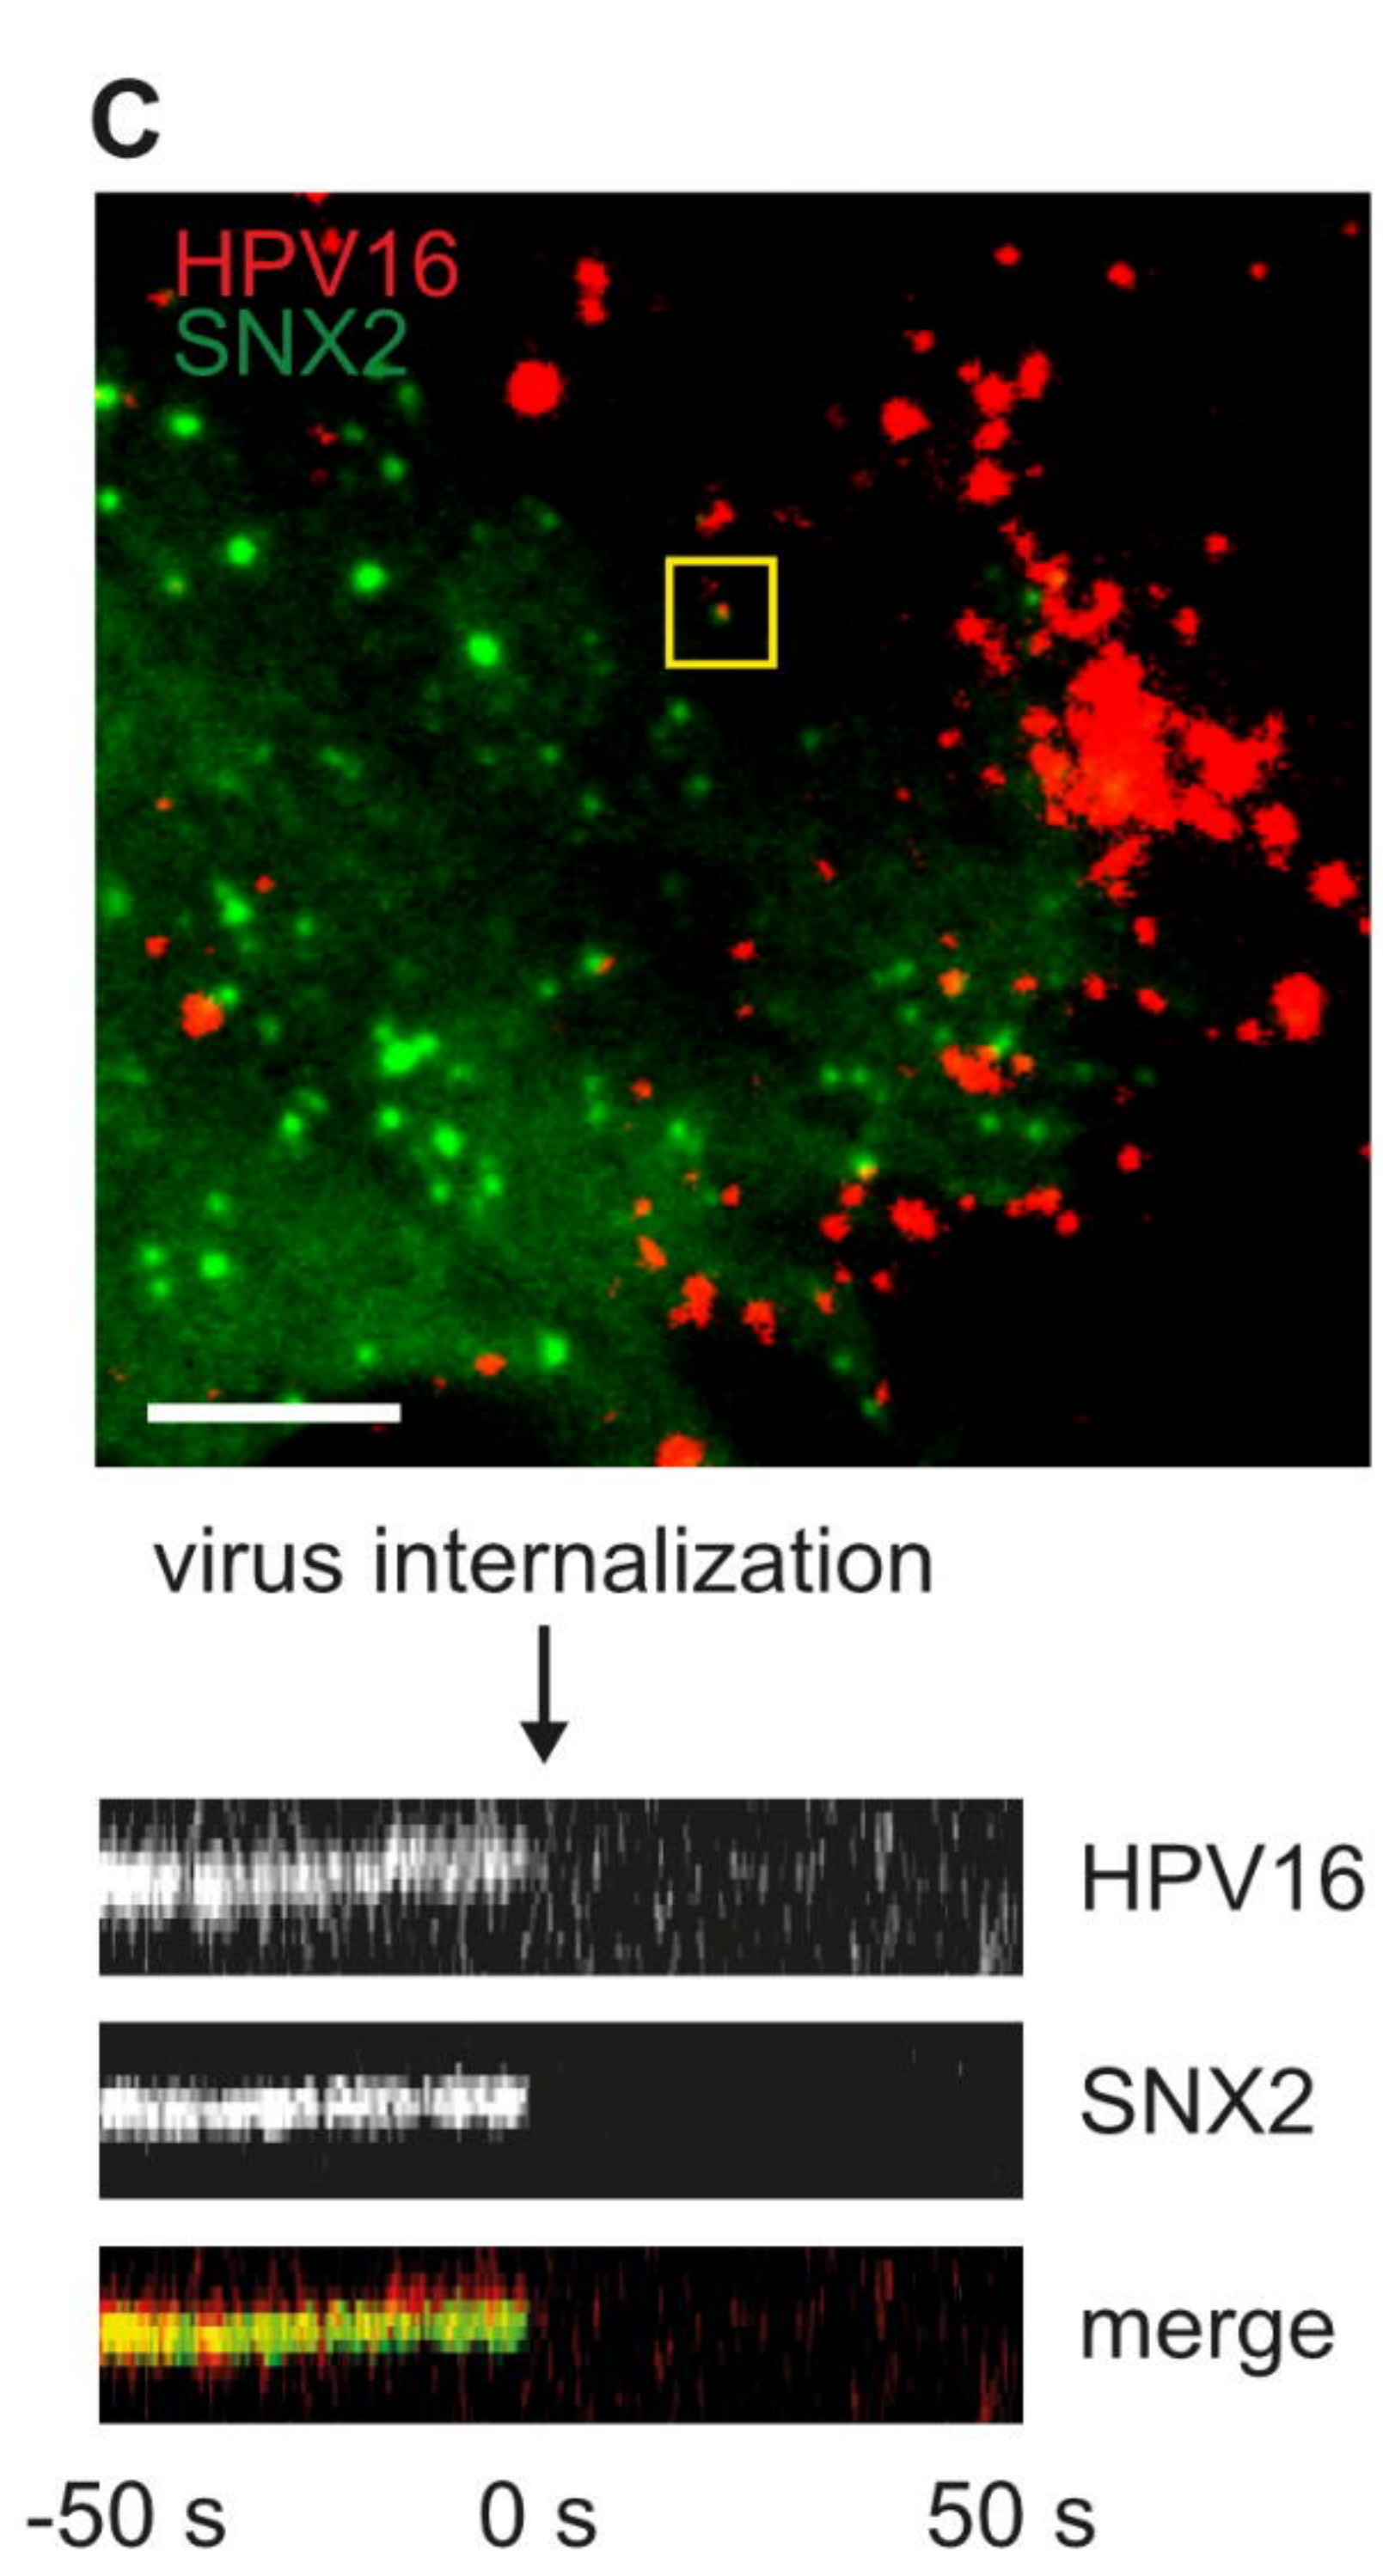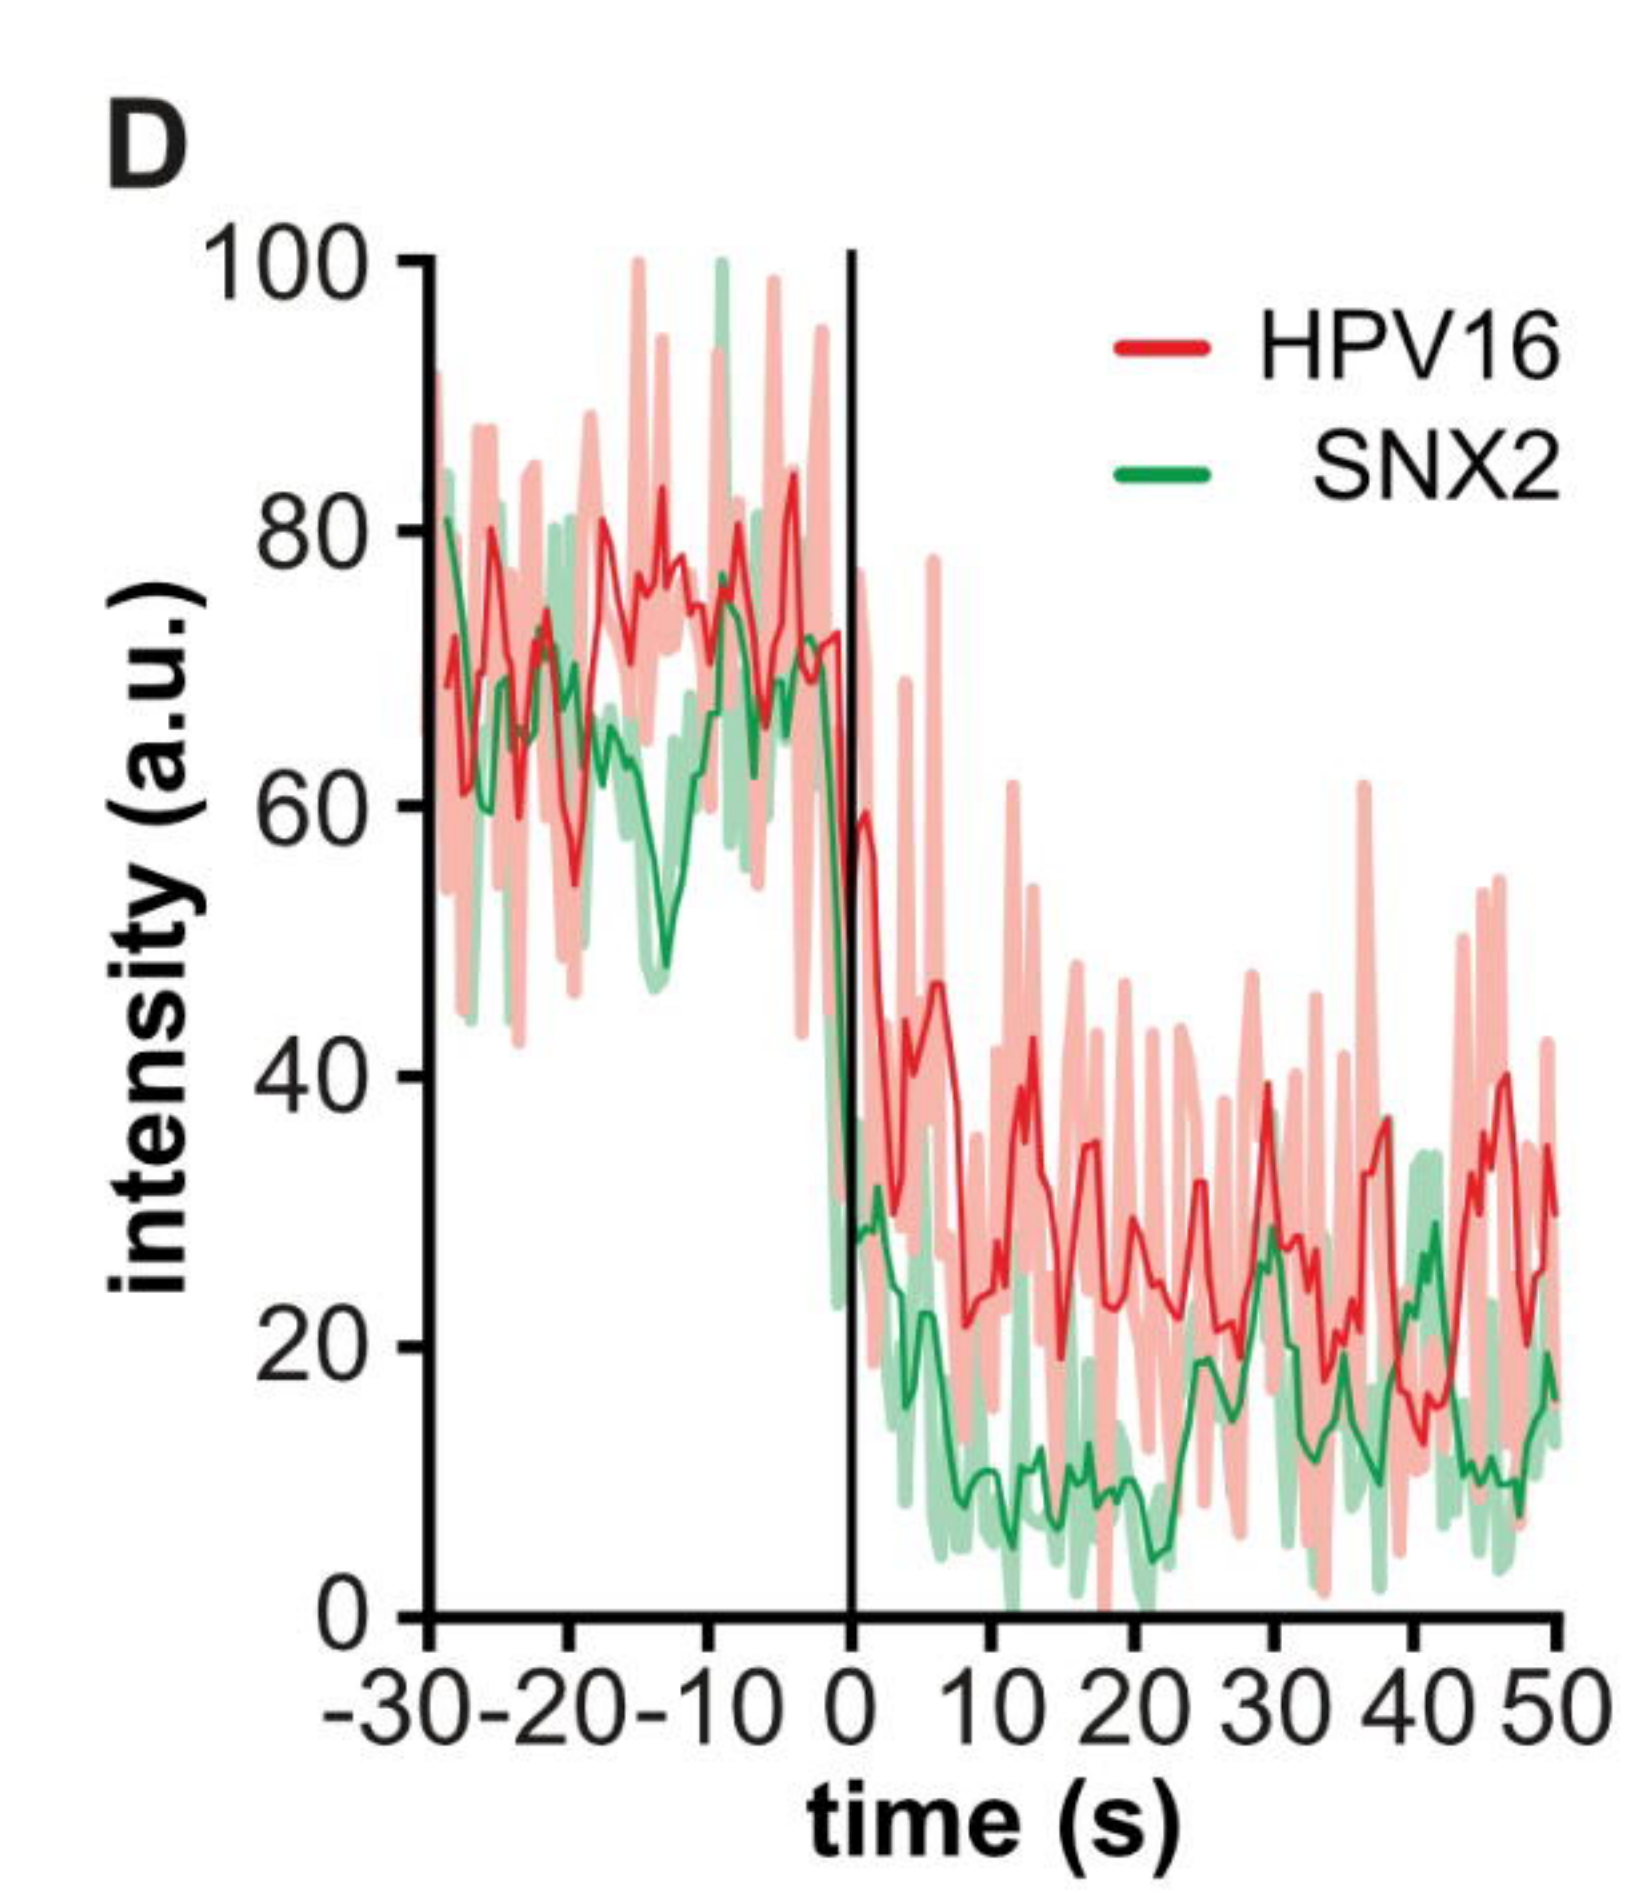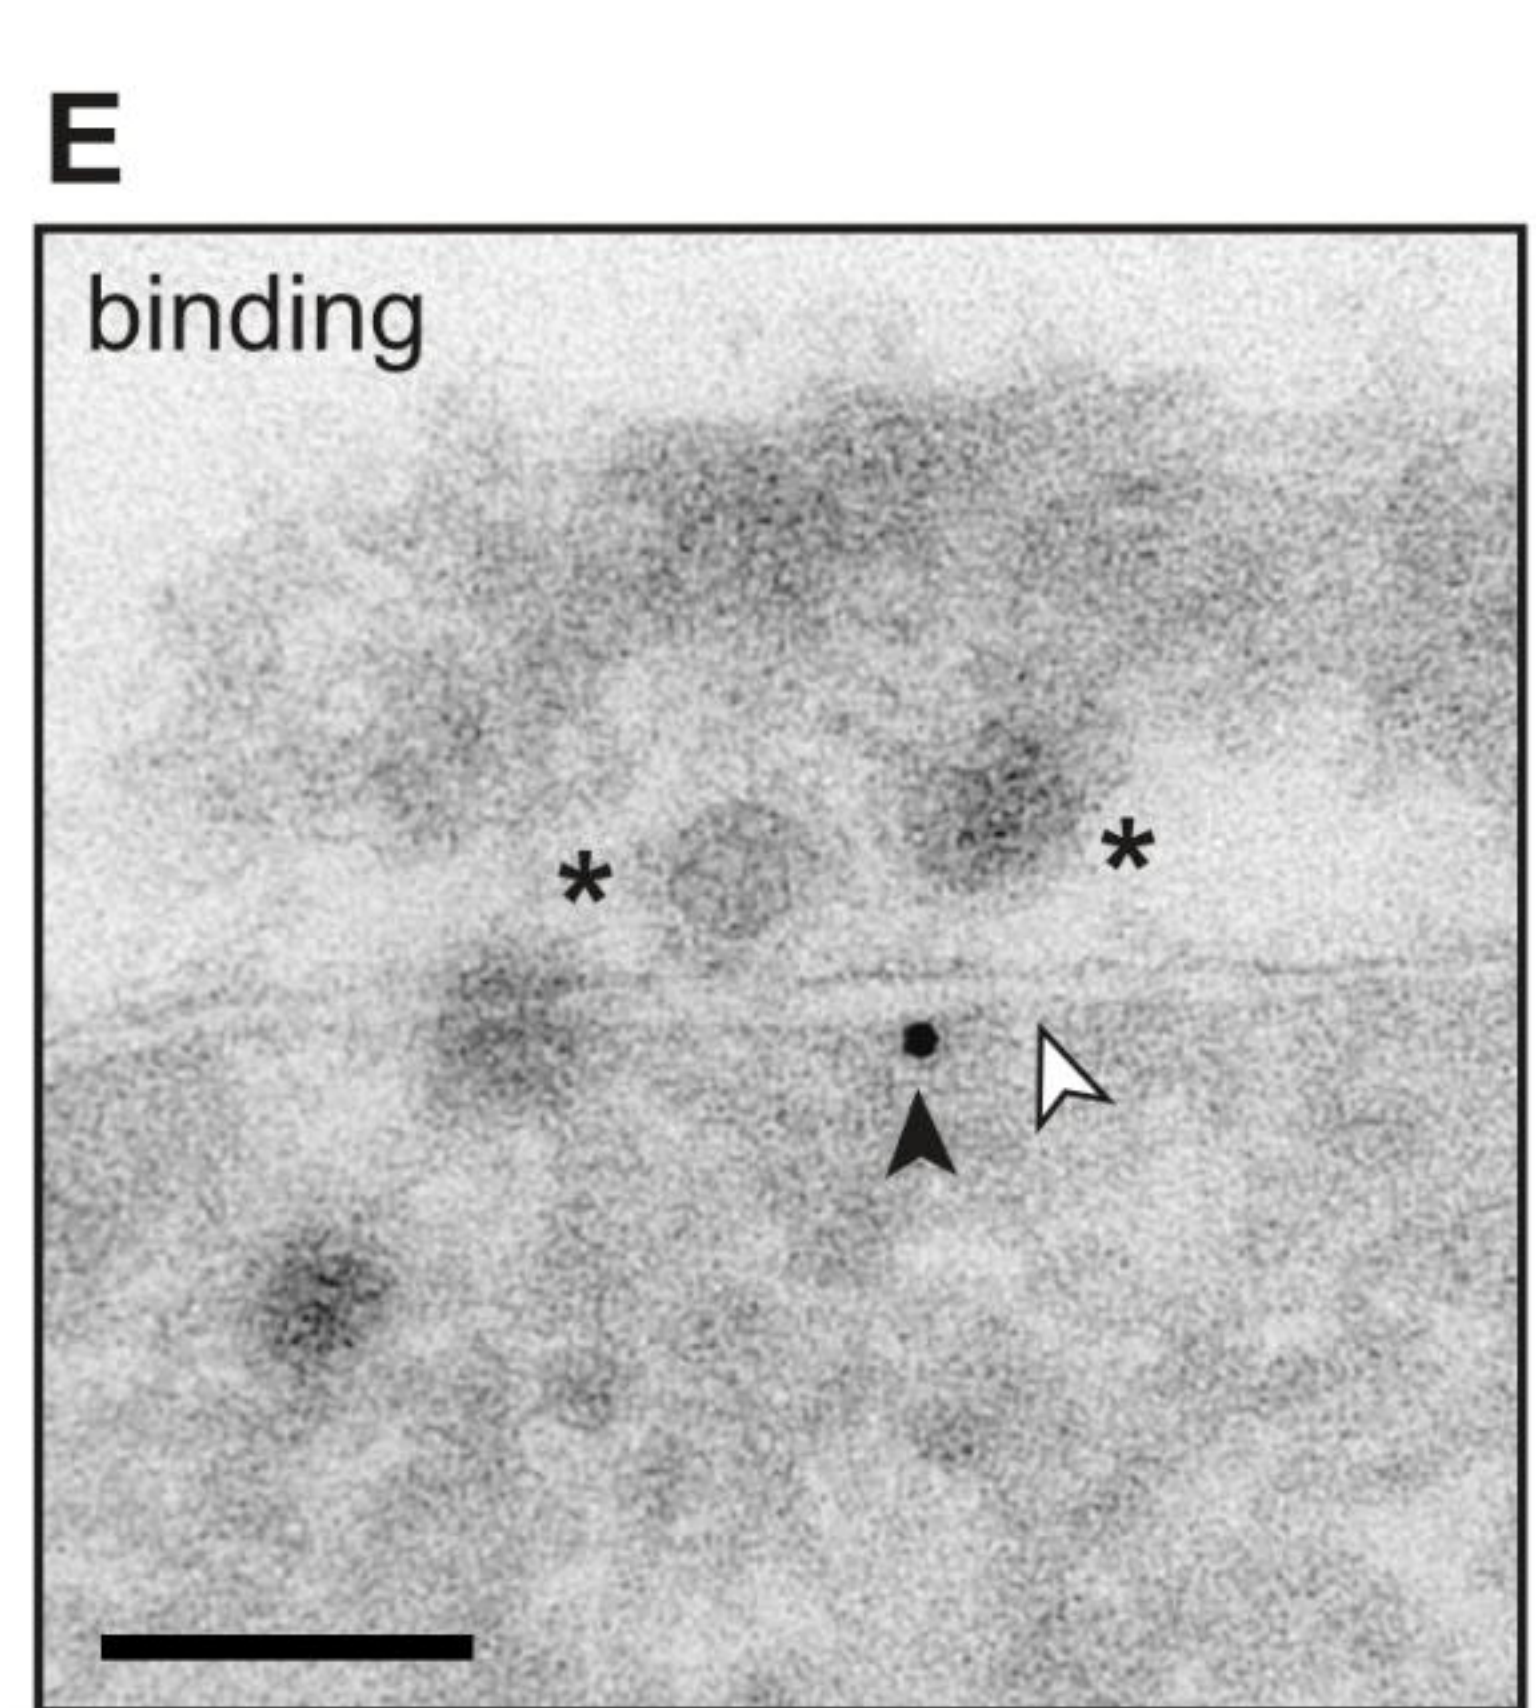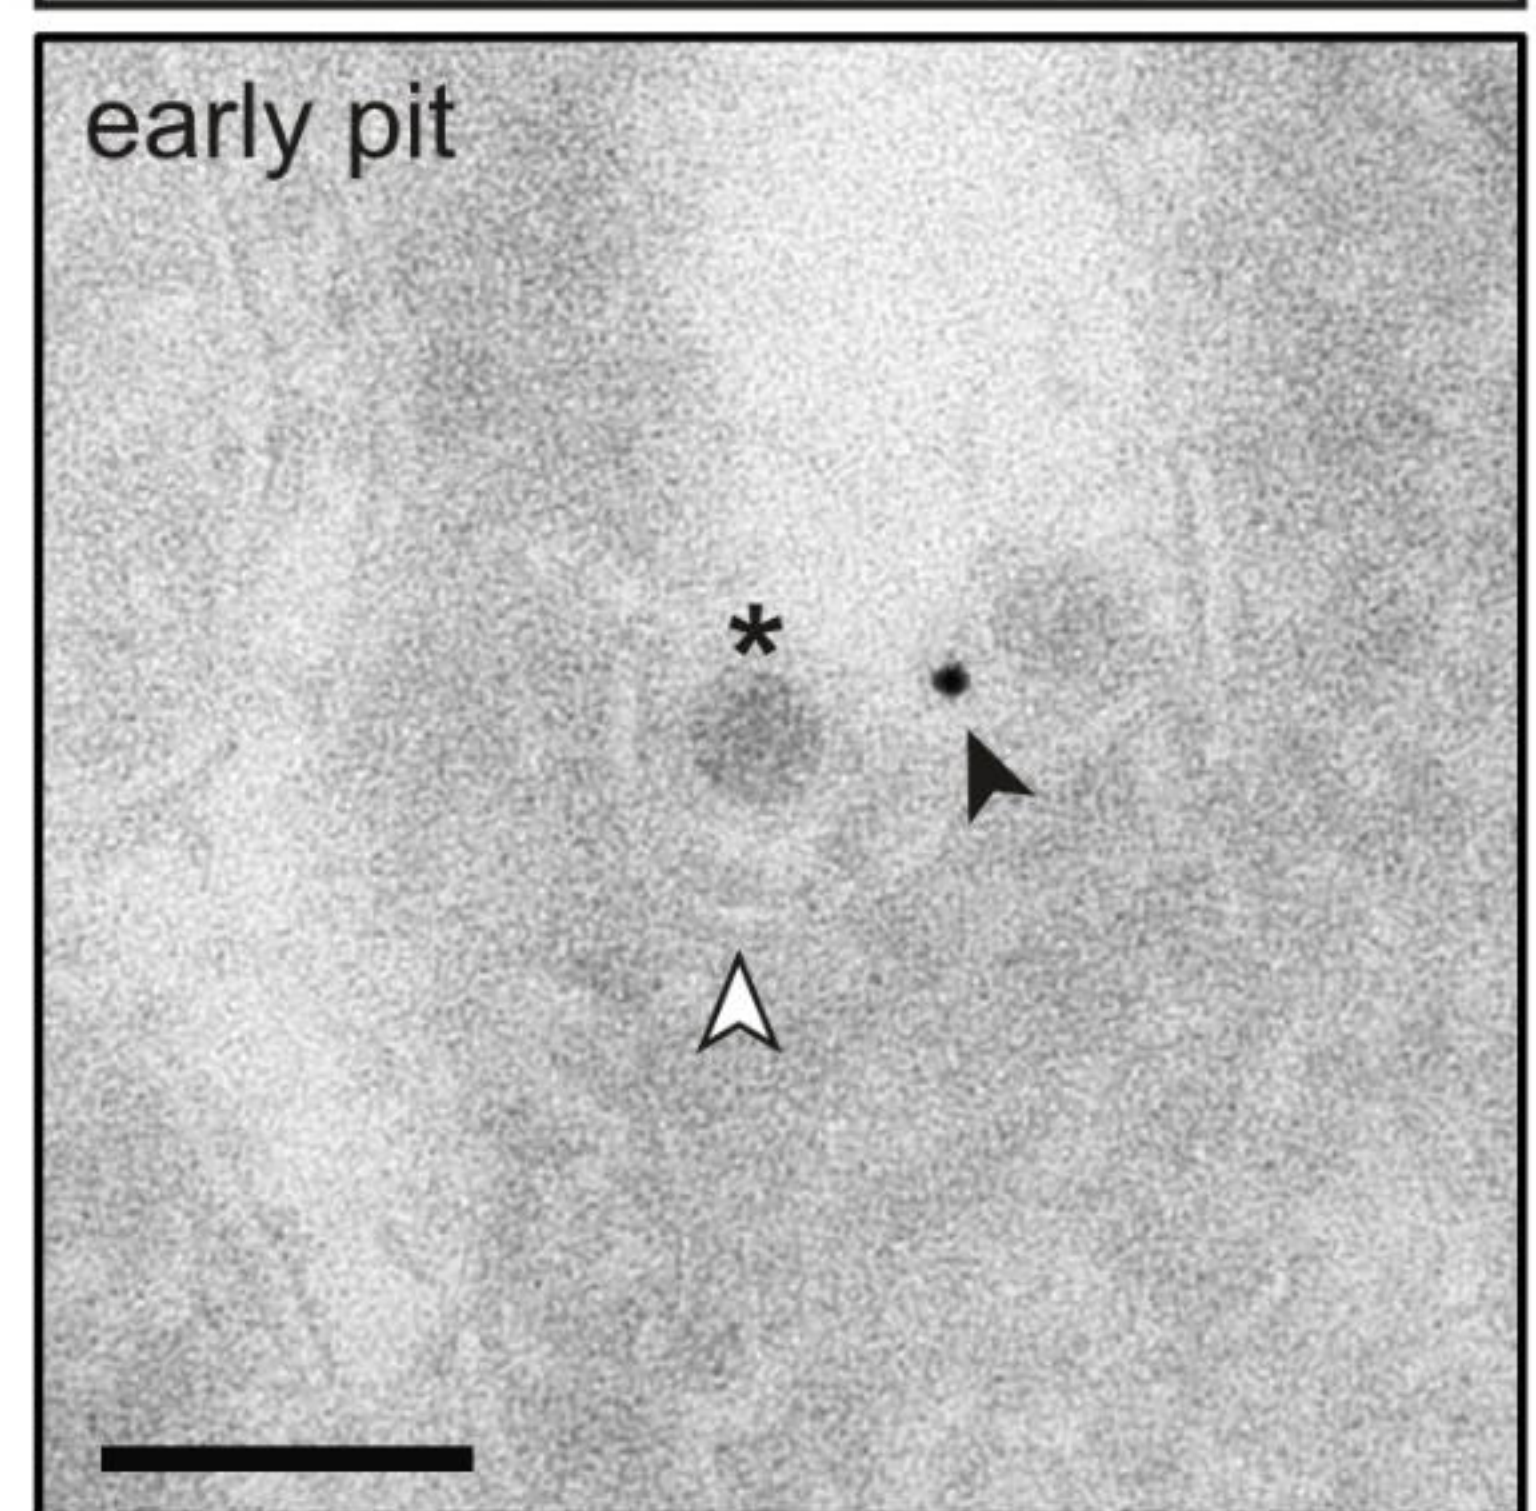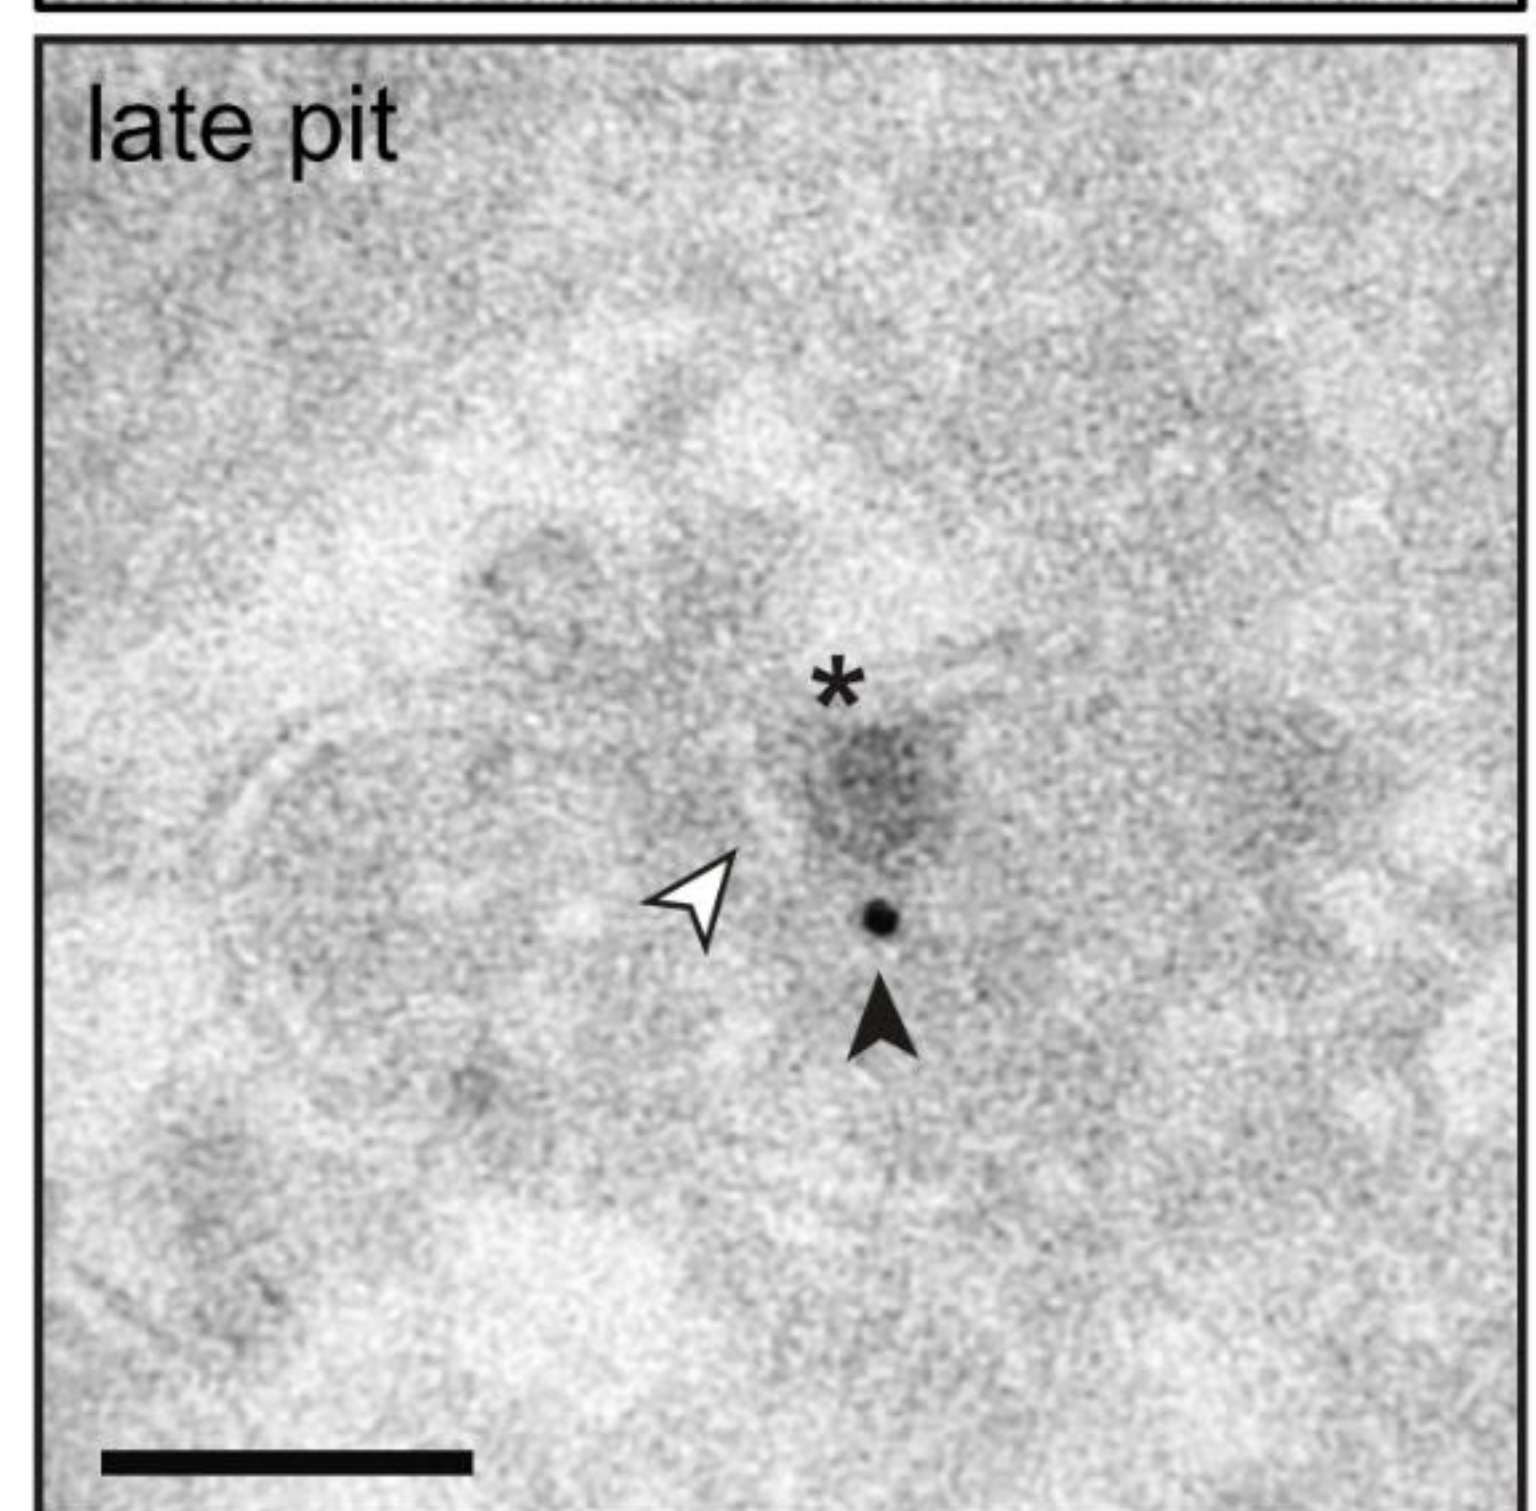

**CME**

**WASH-ME**

**macropinocytosis**

pit induction

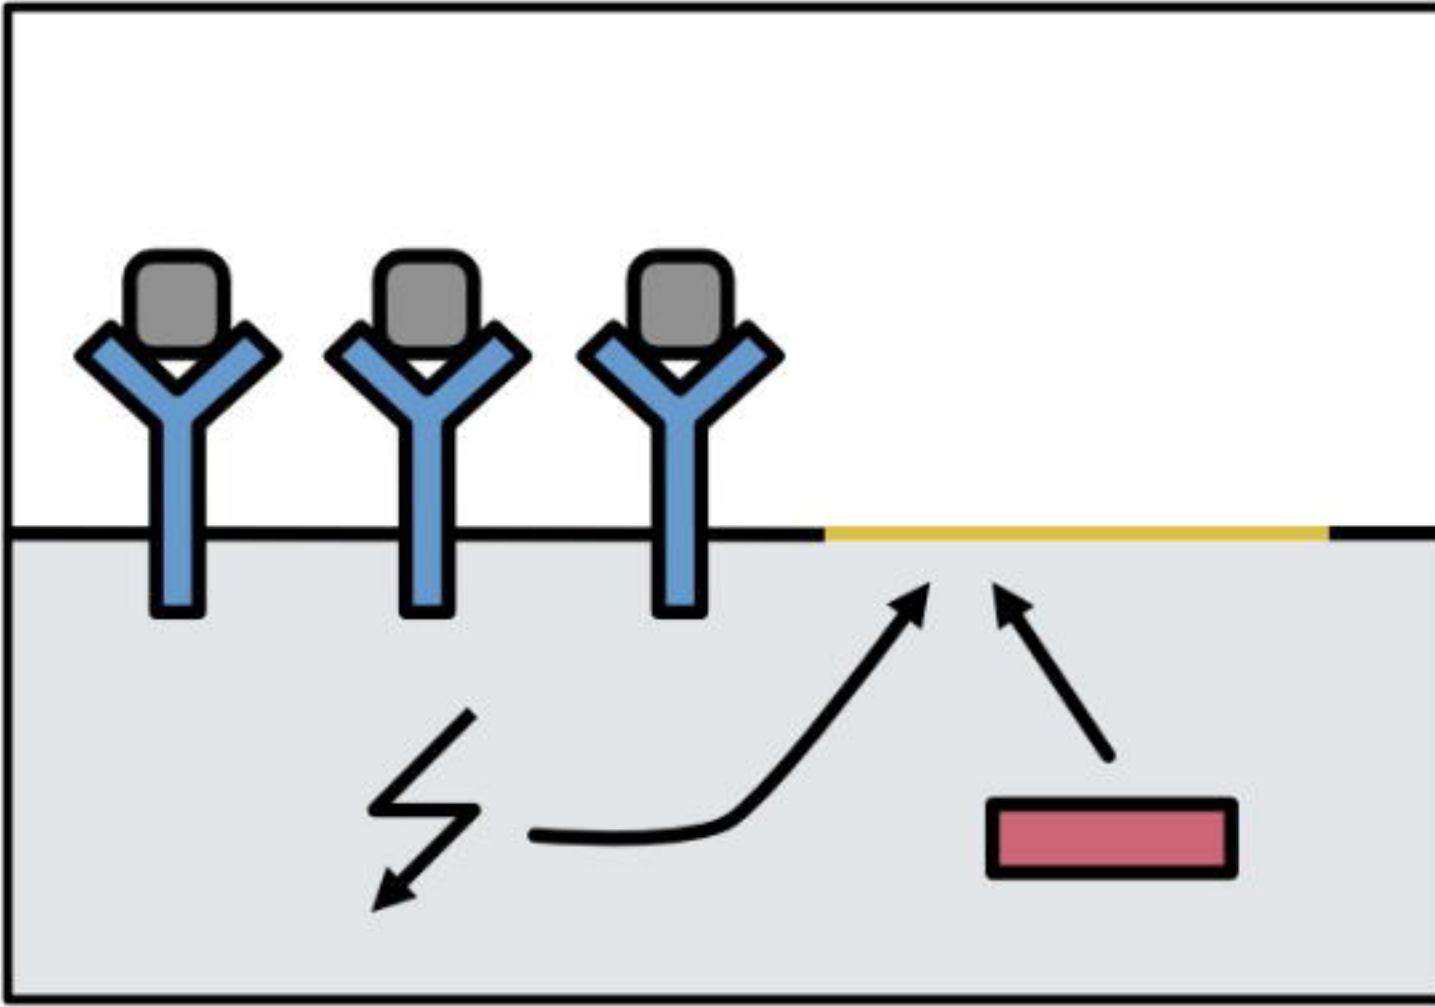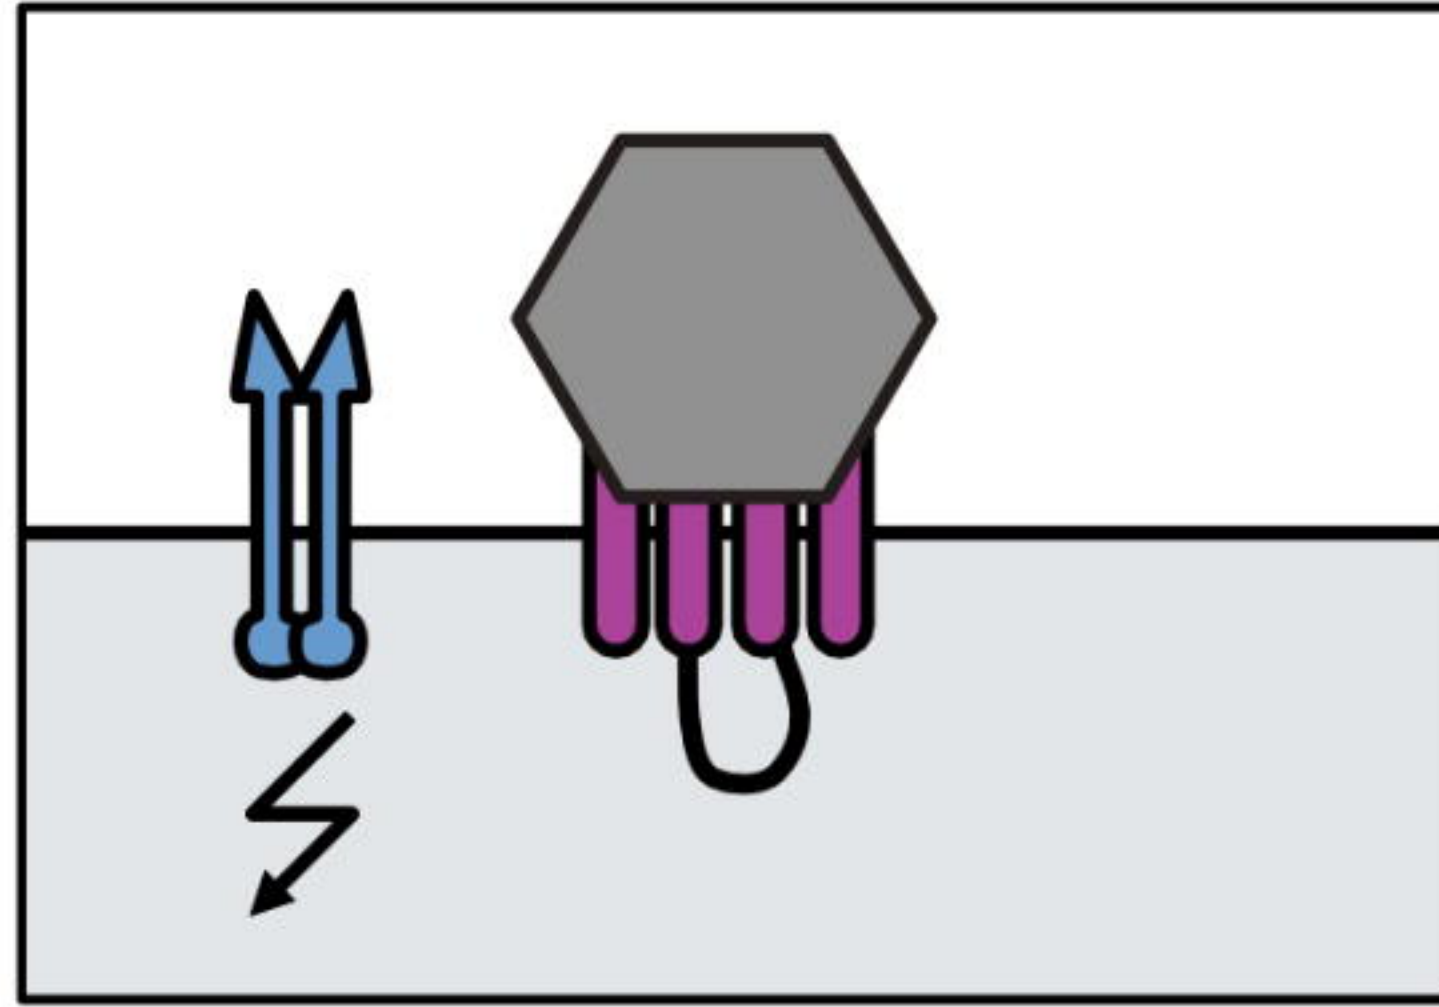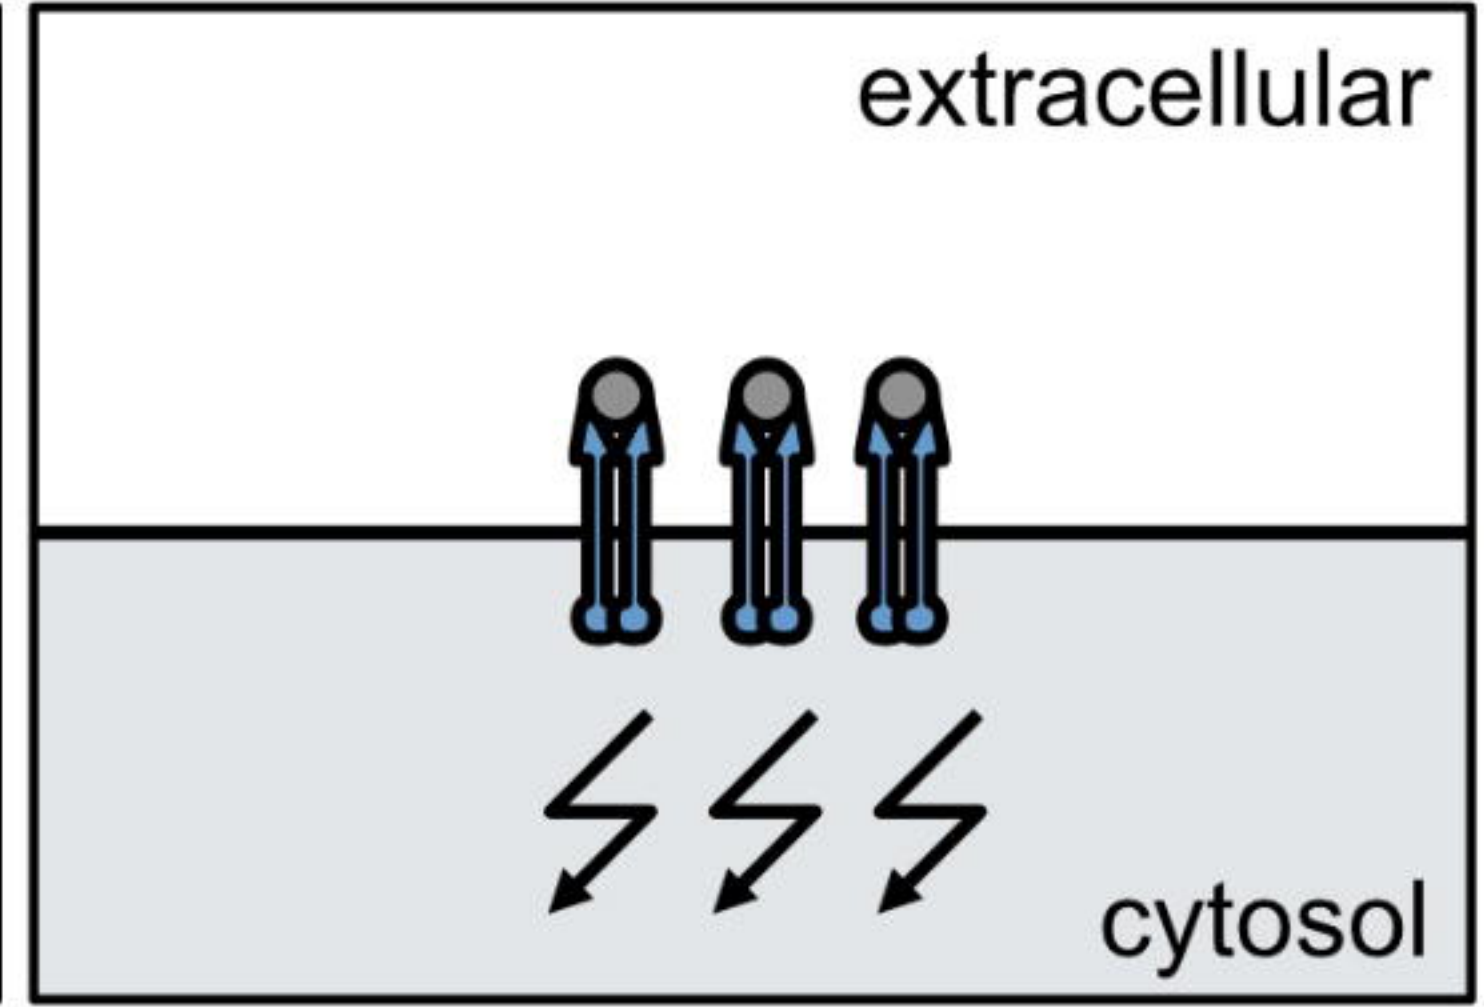

pit dilation

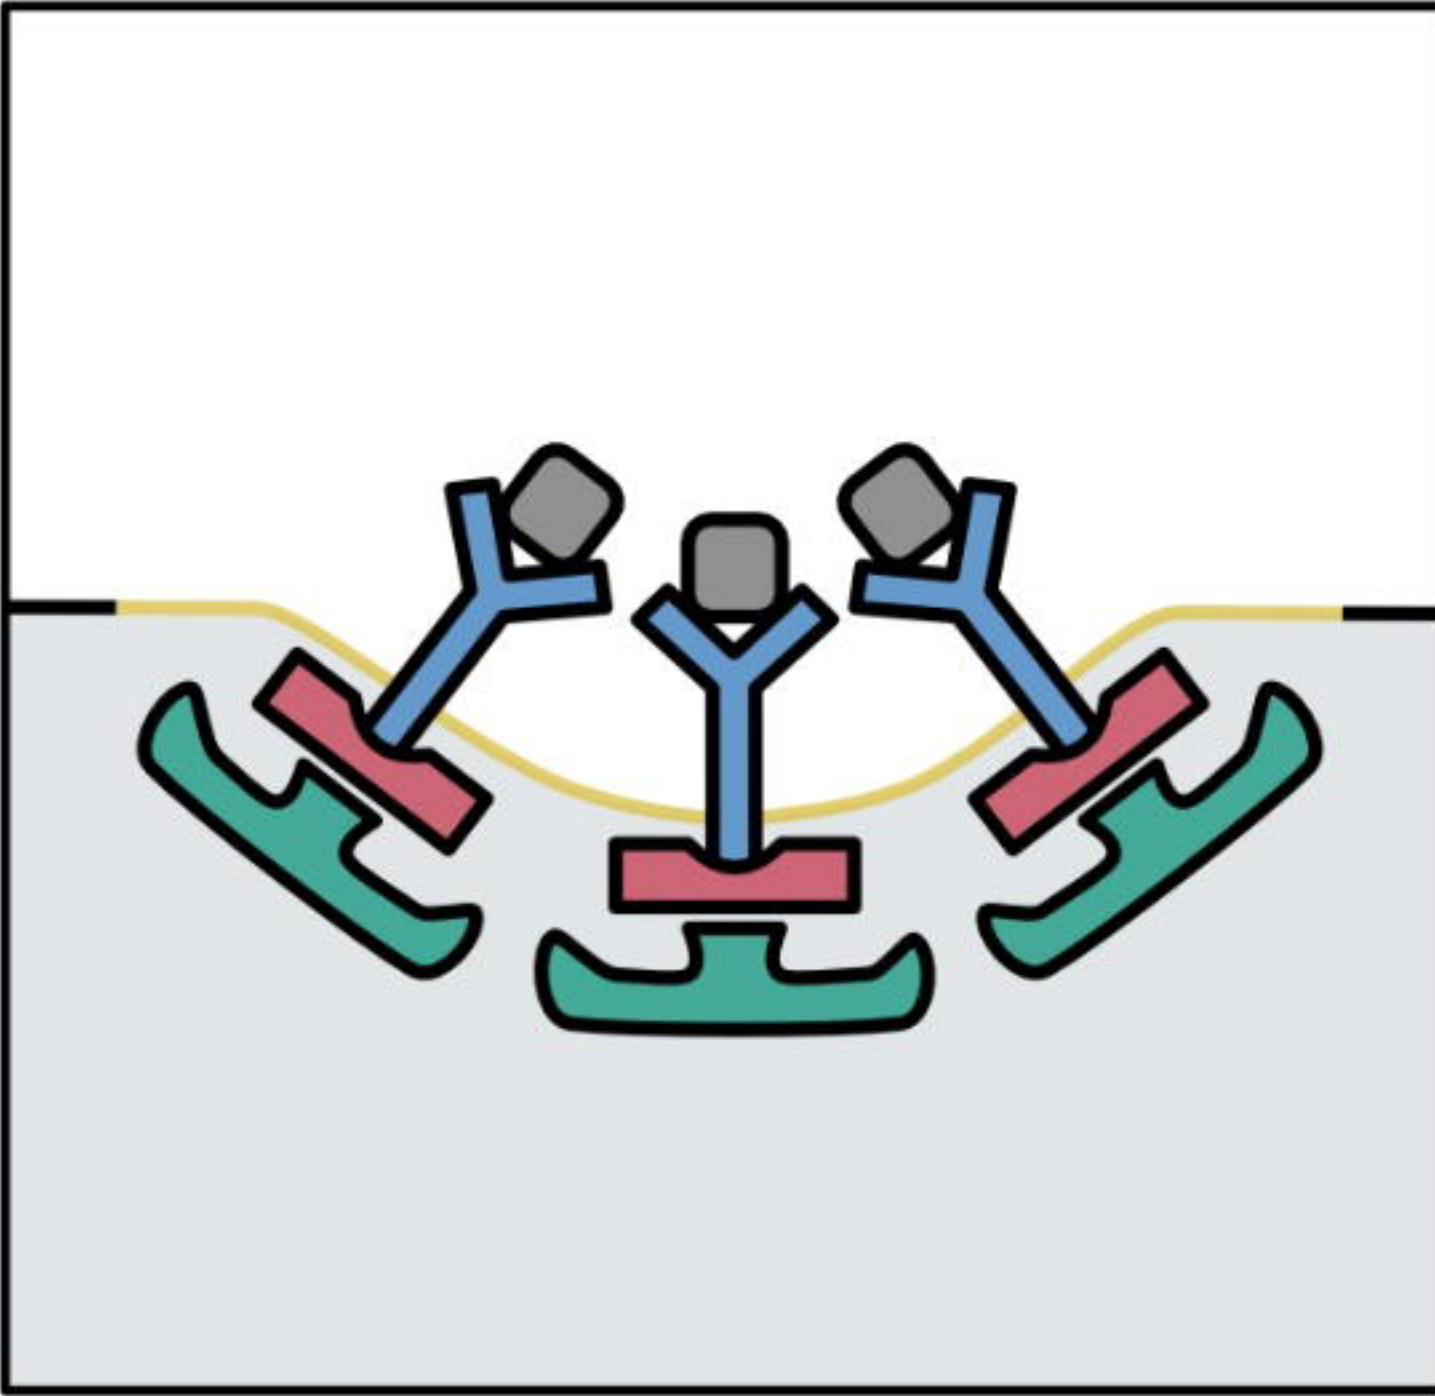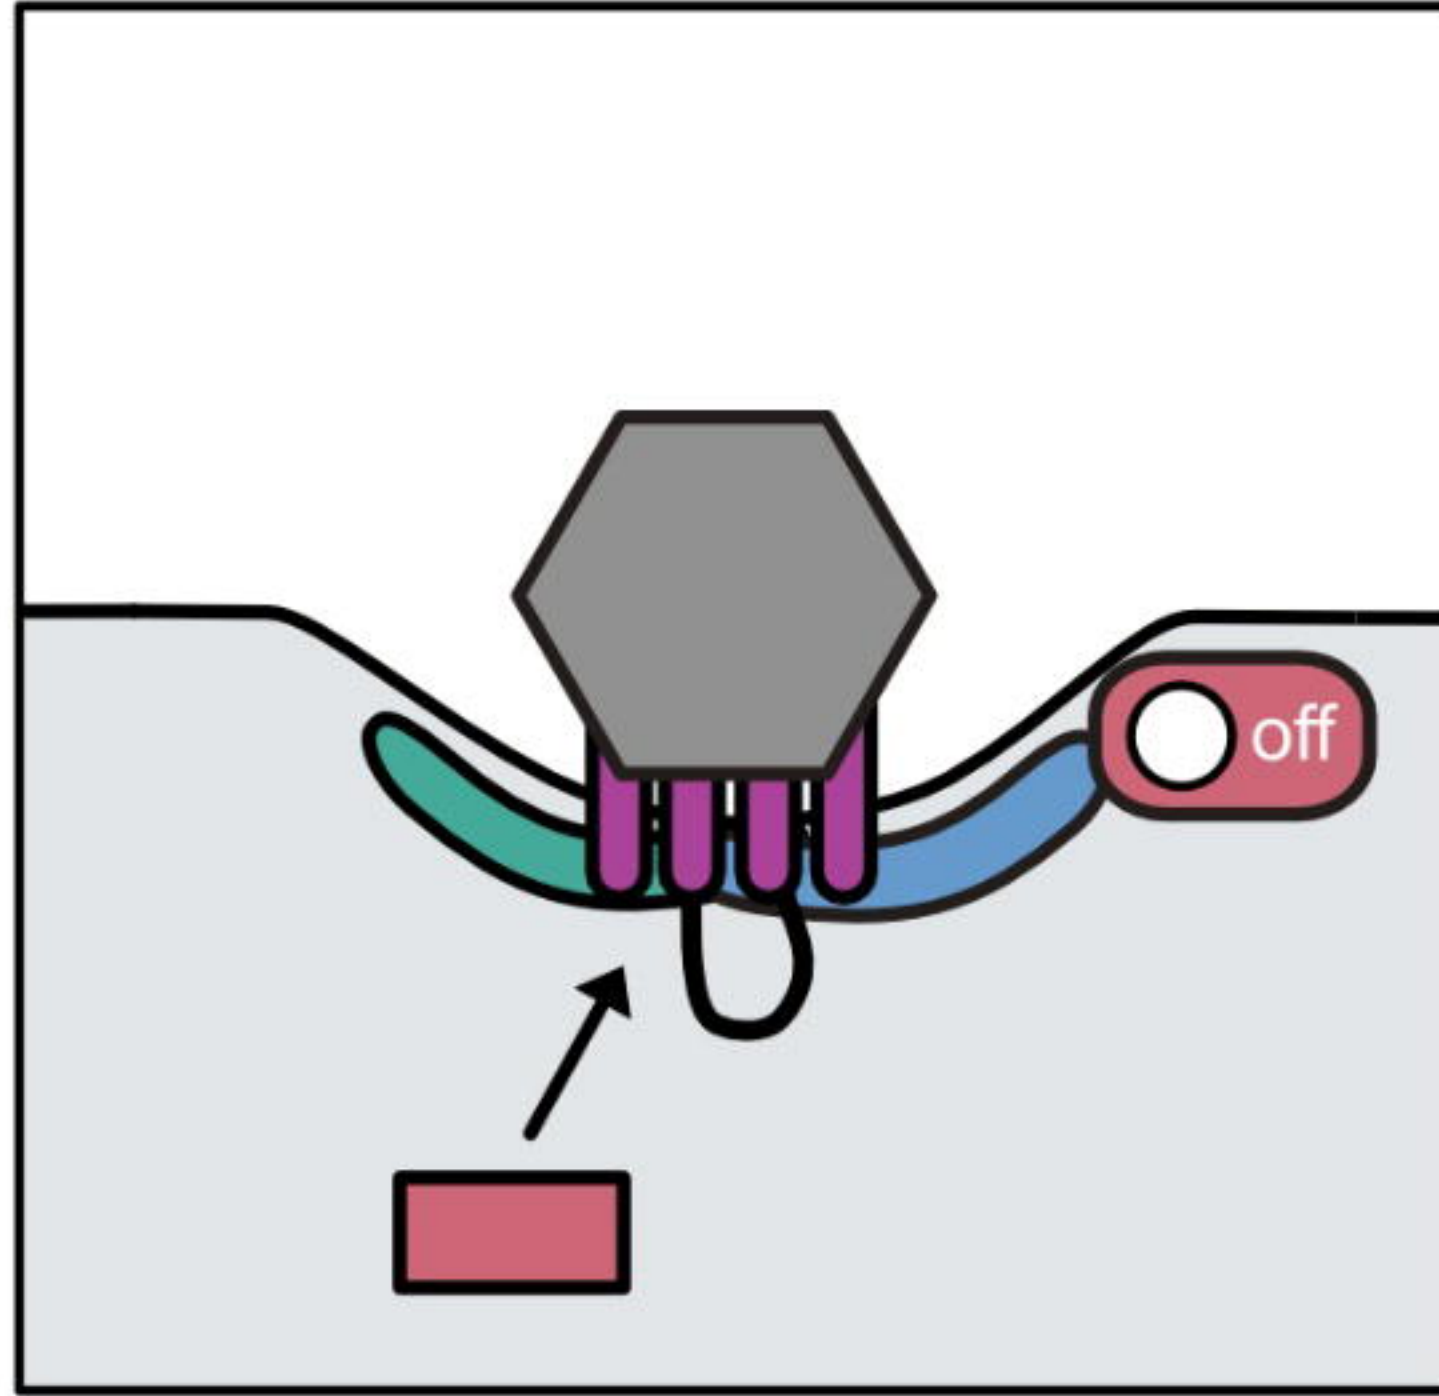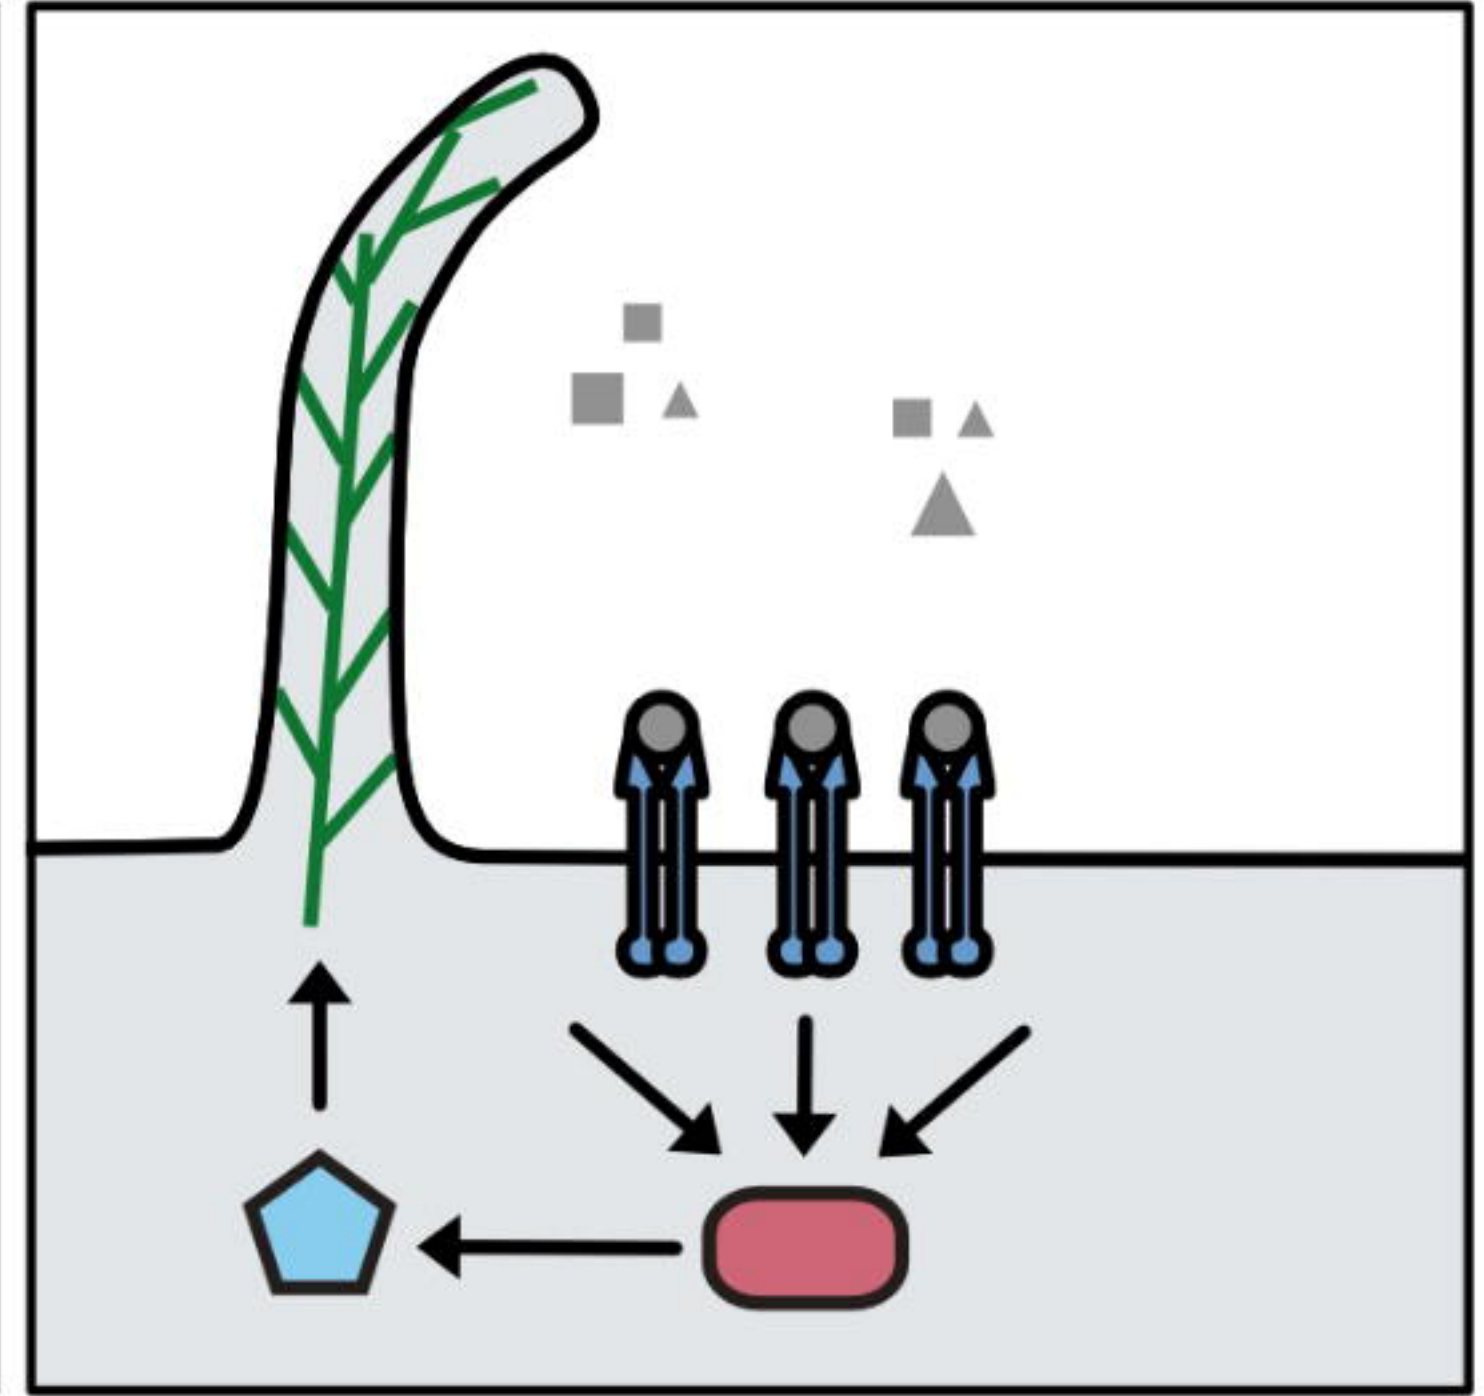

scission

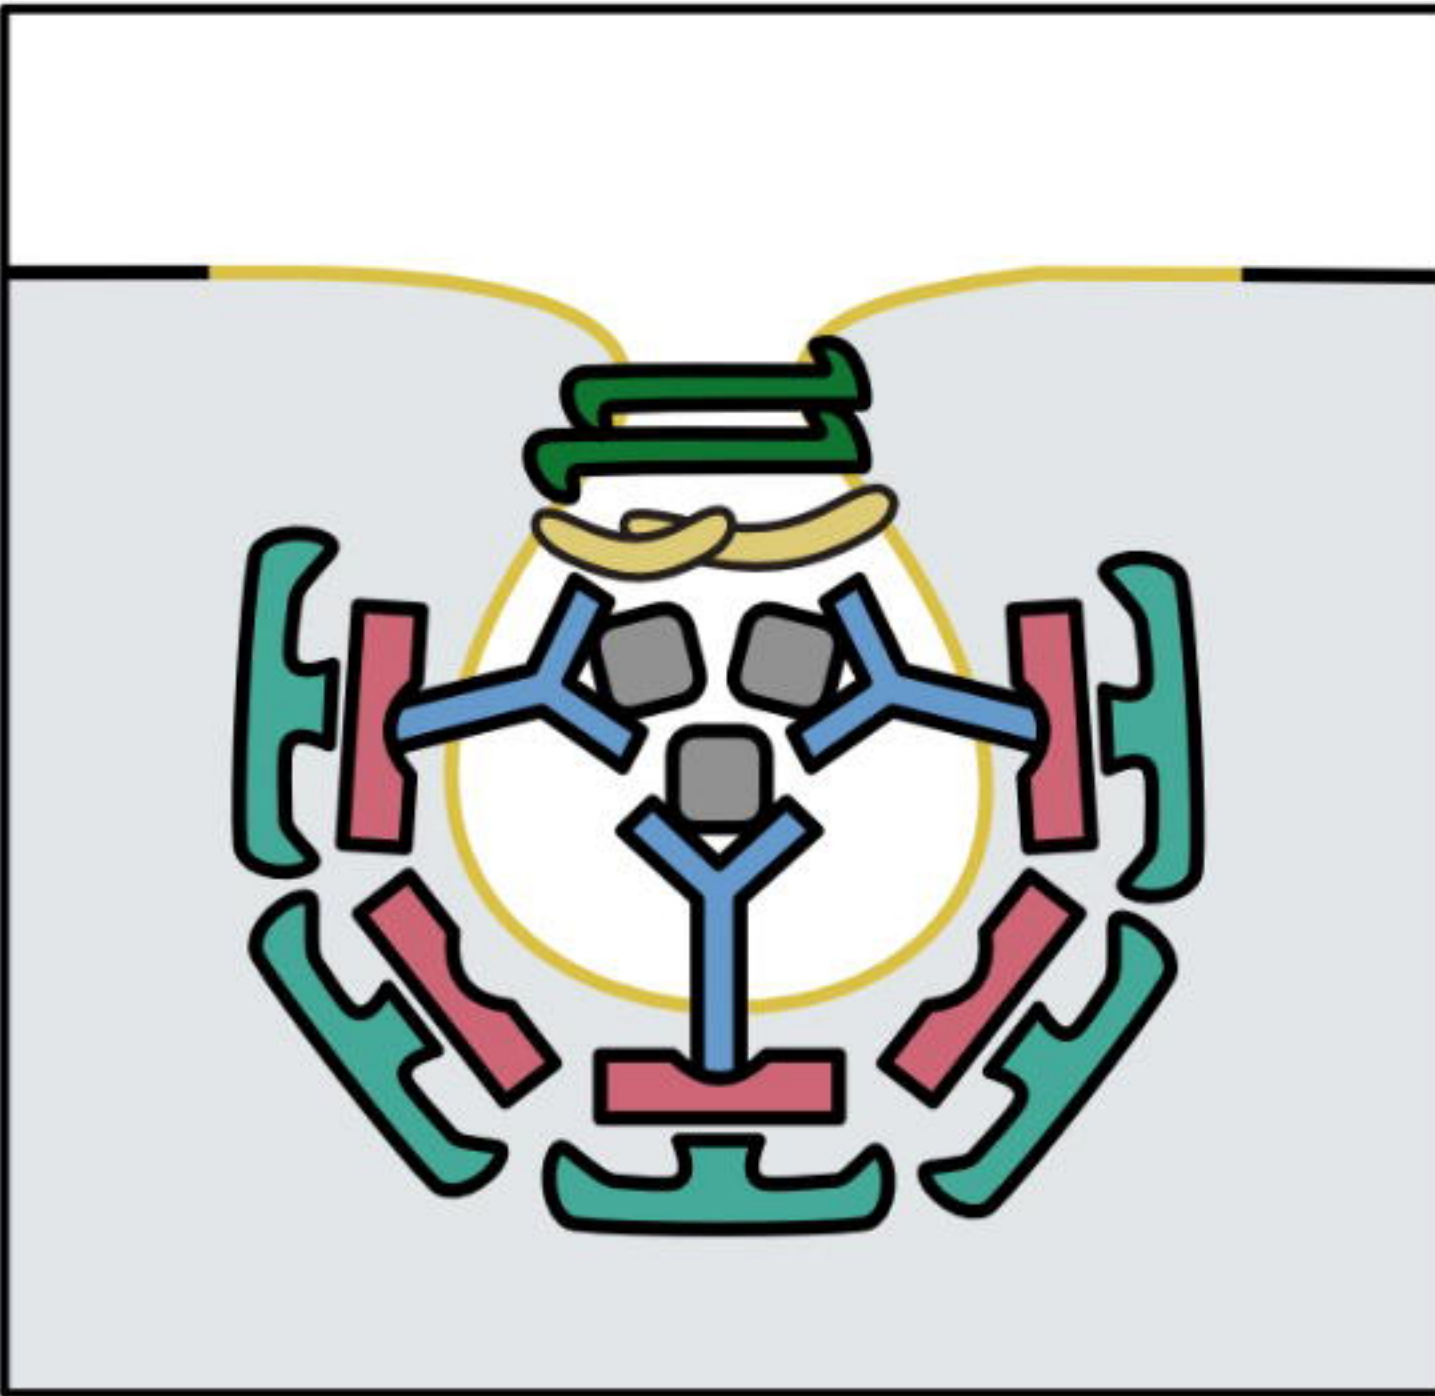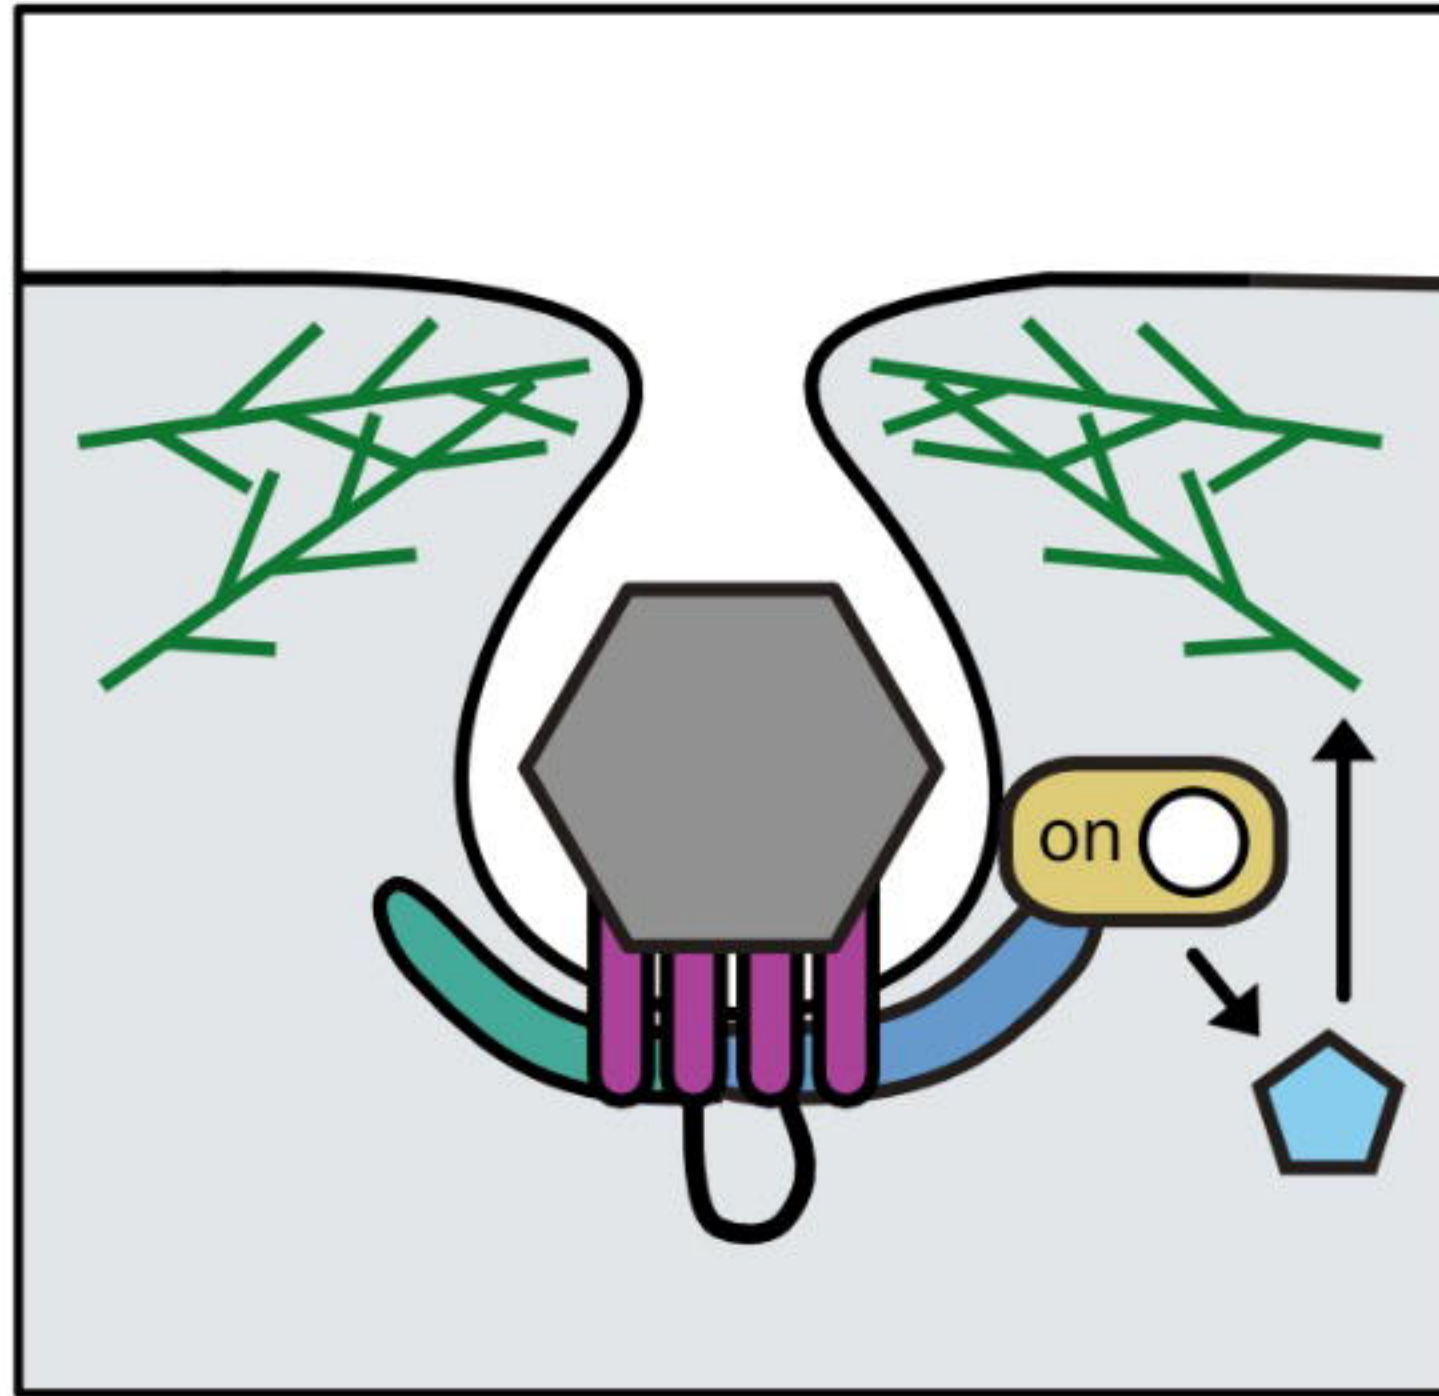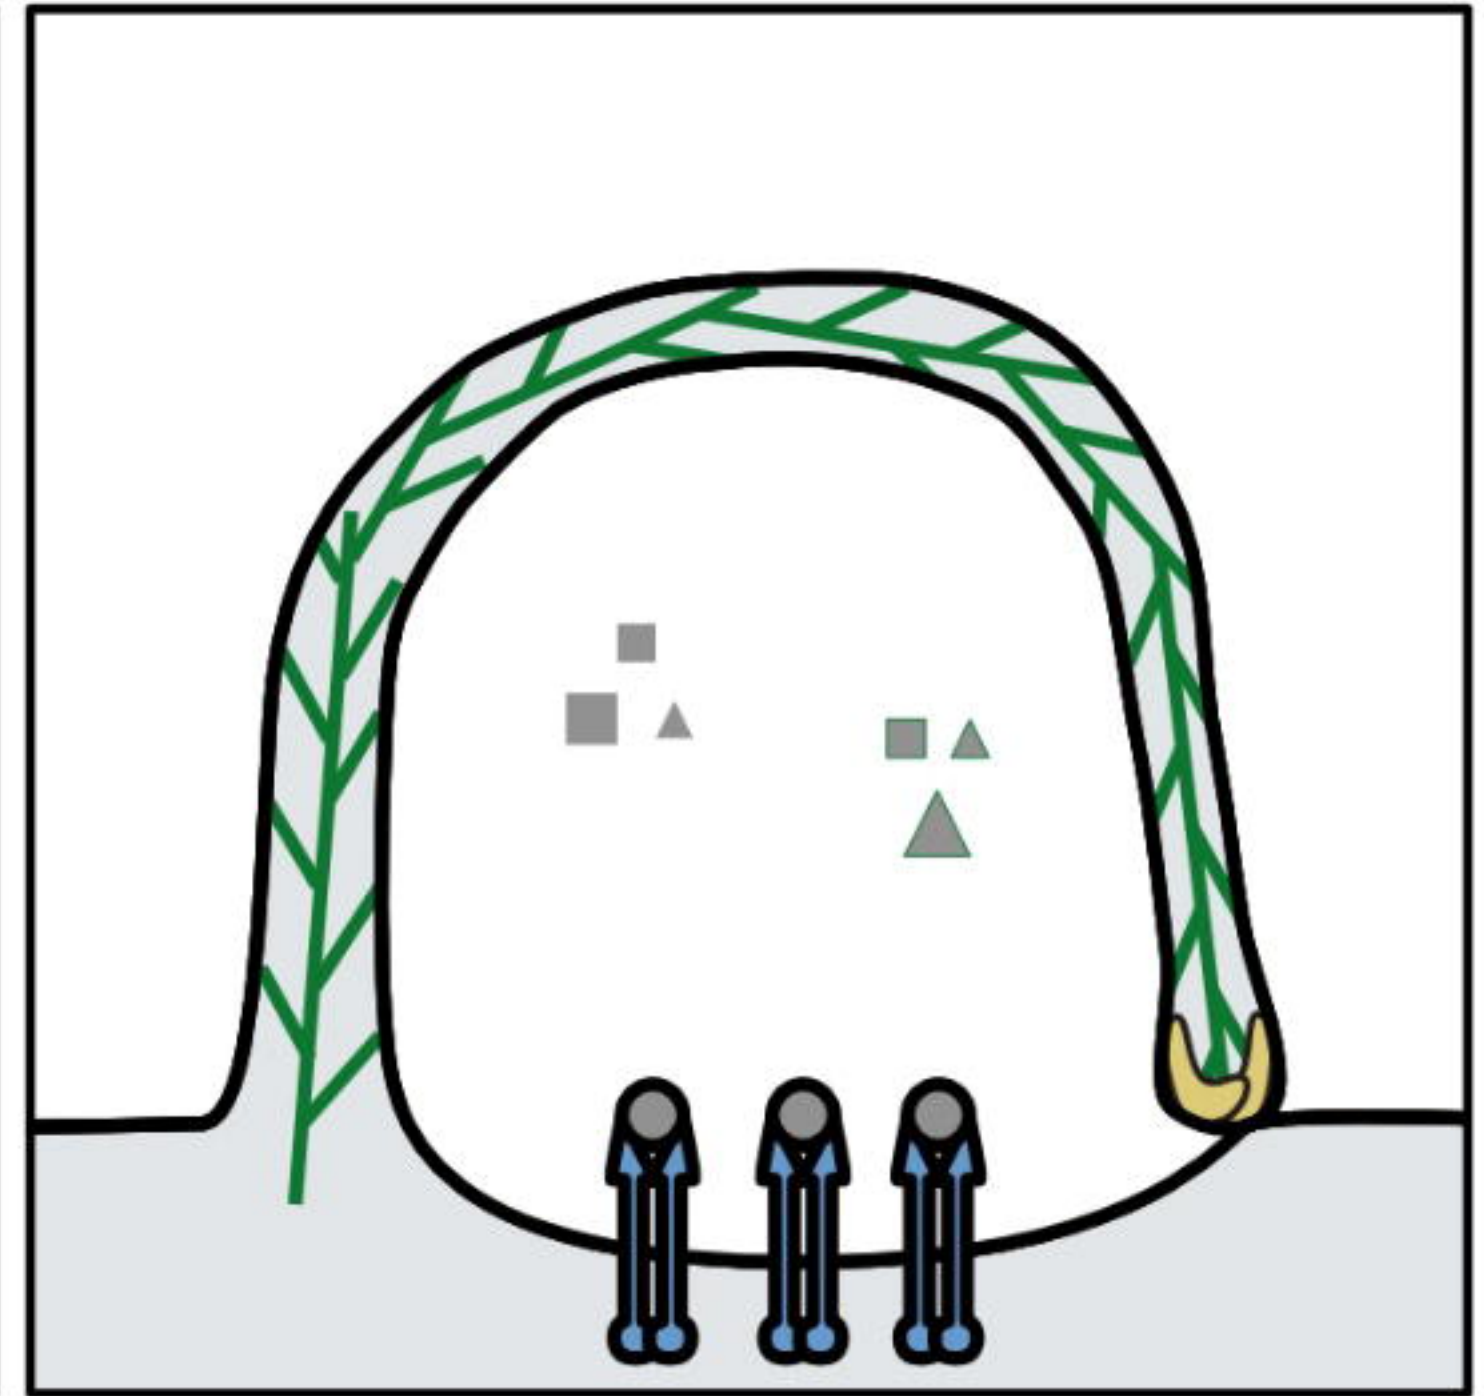

endocytic vacuole

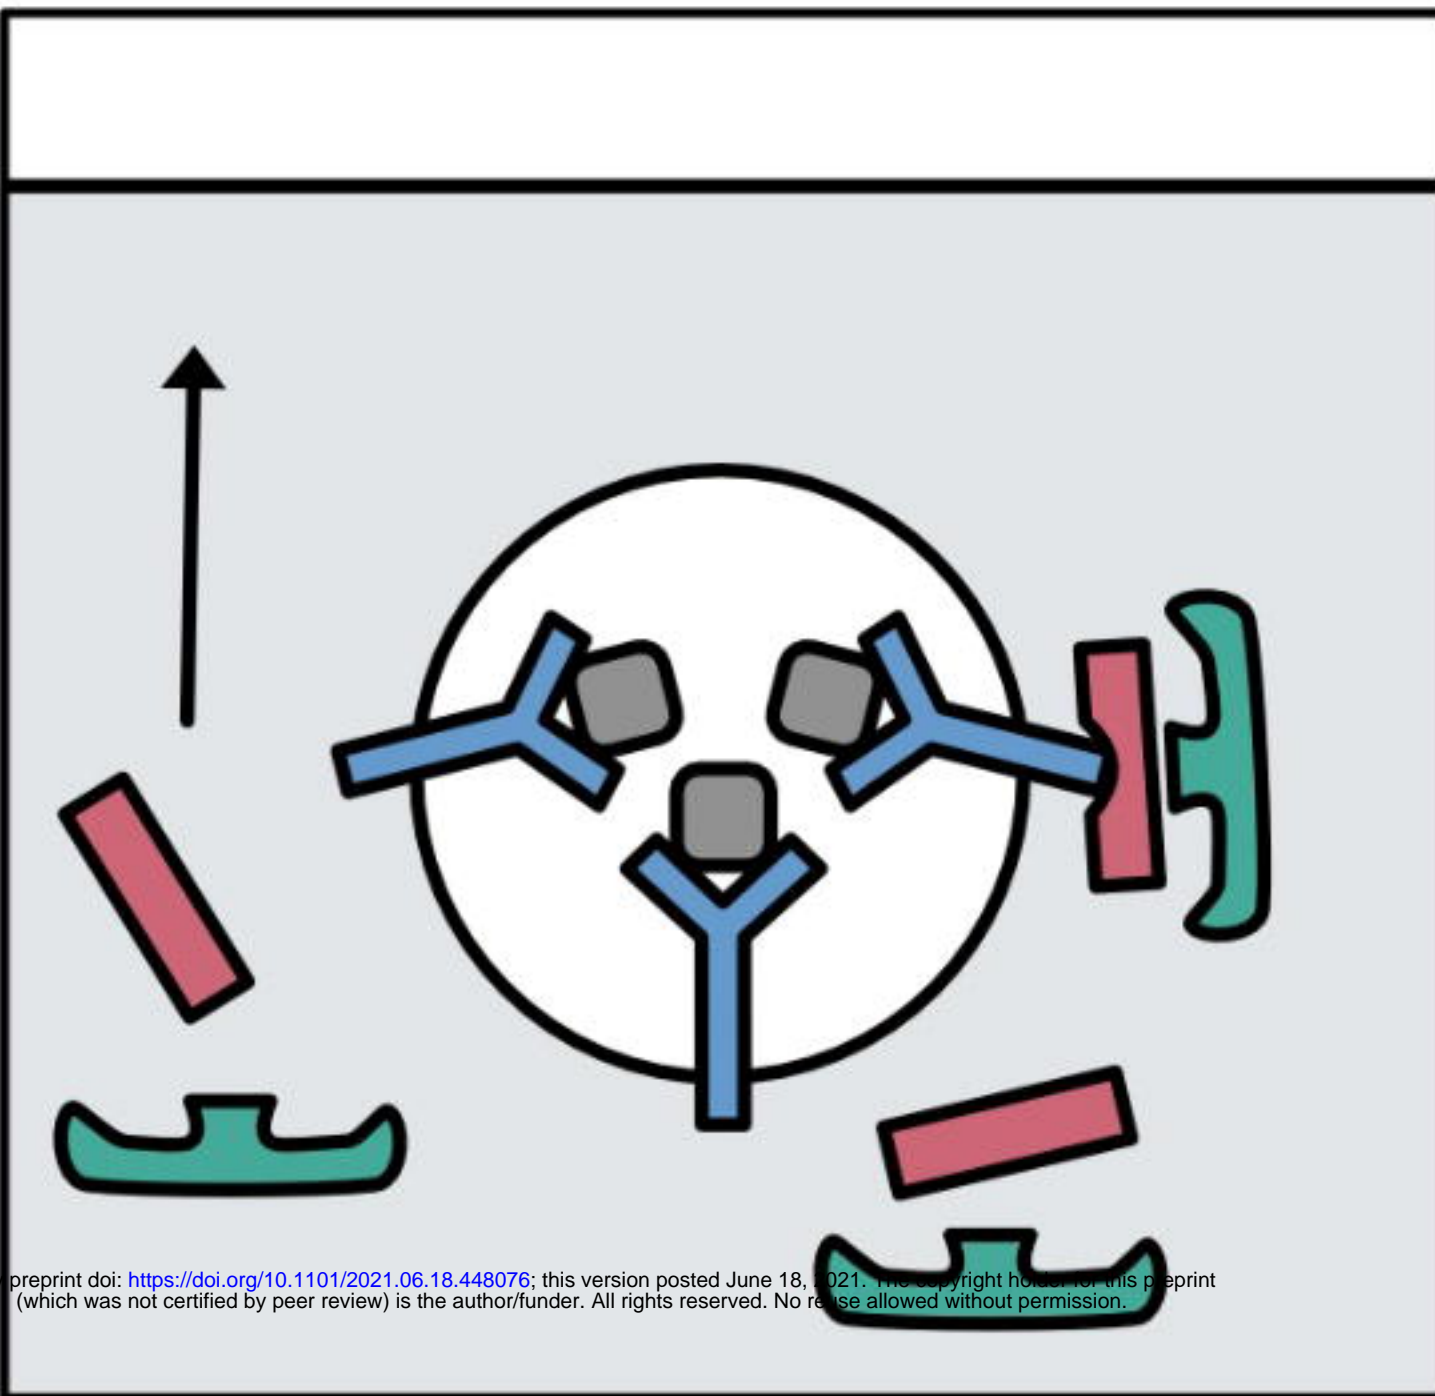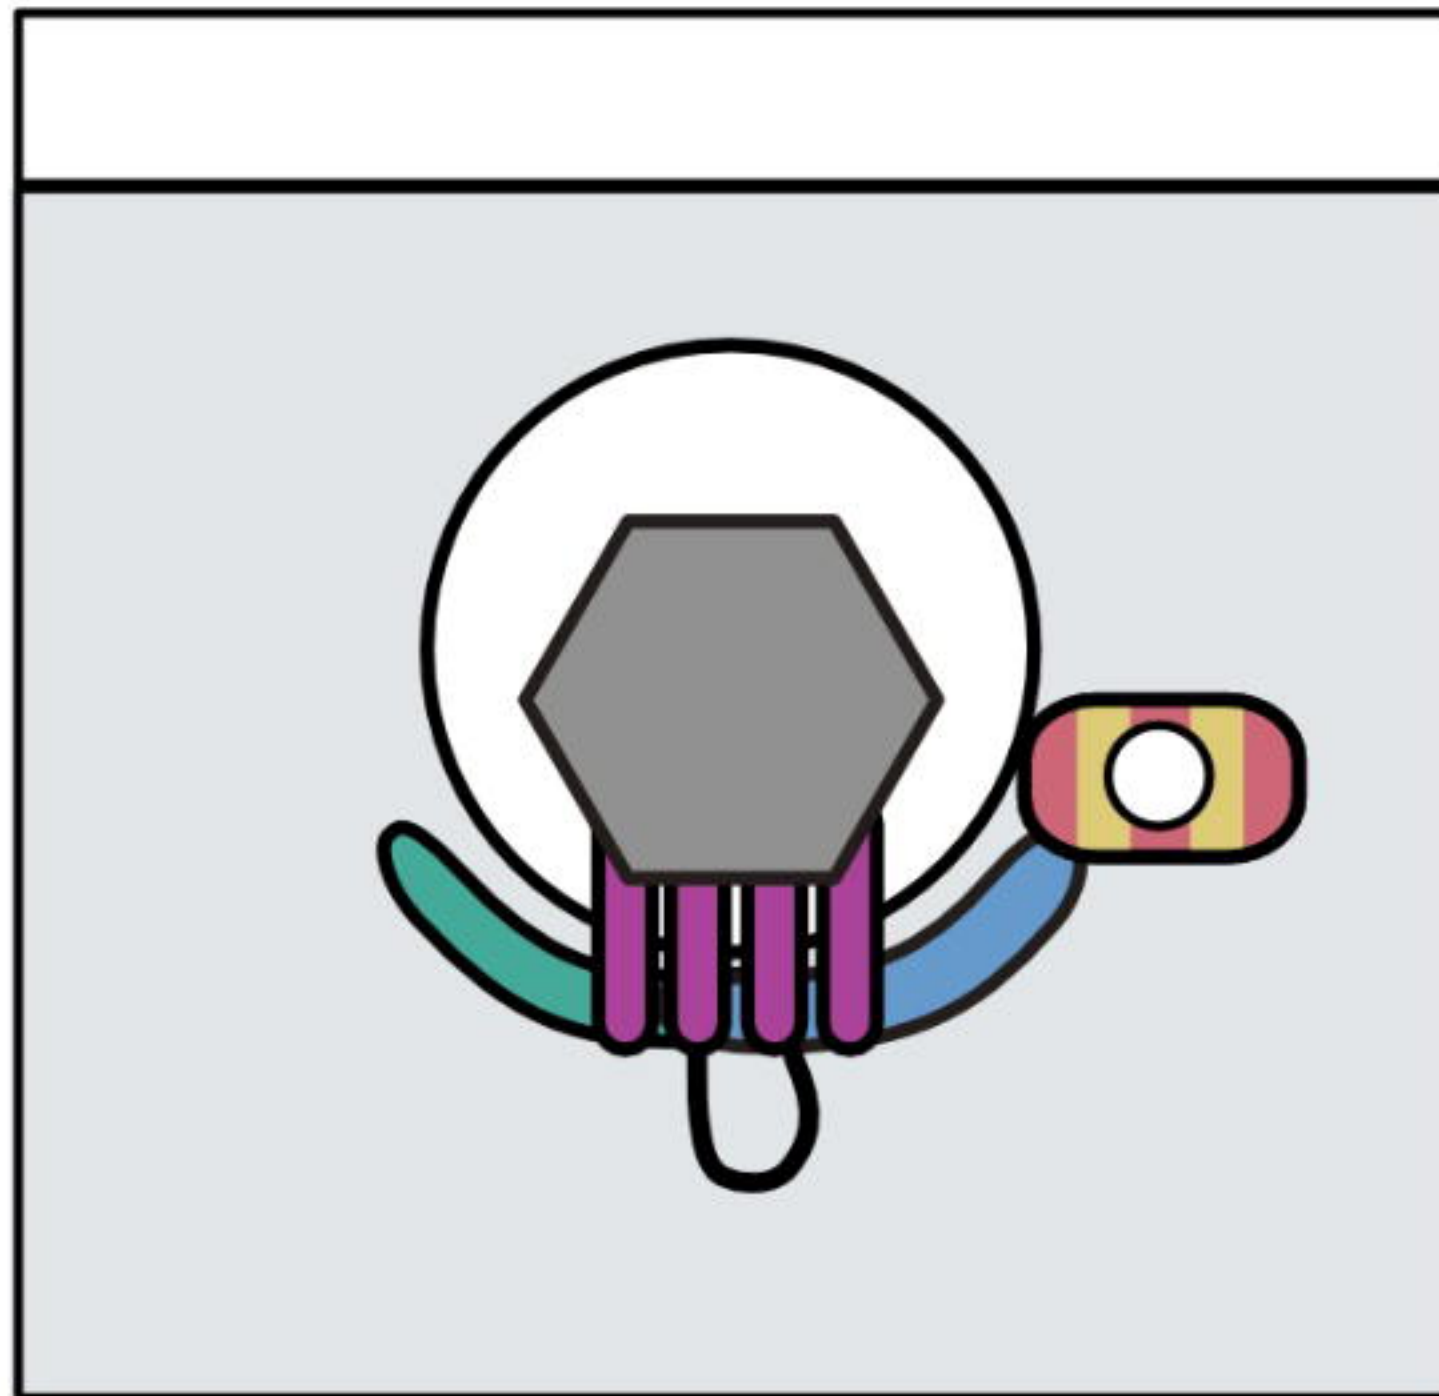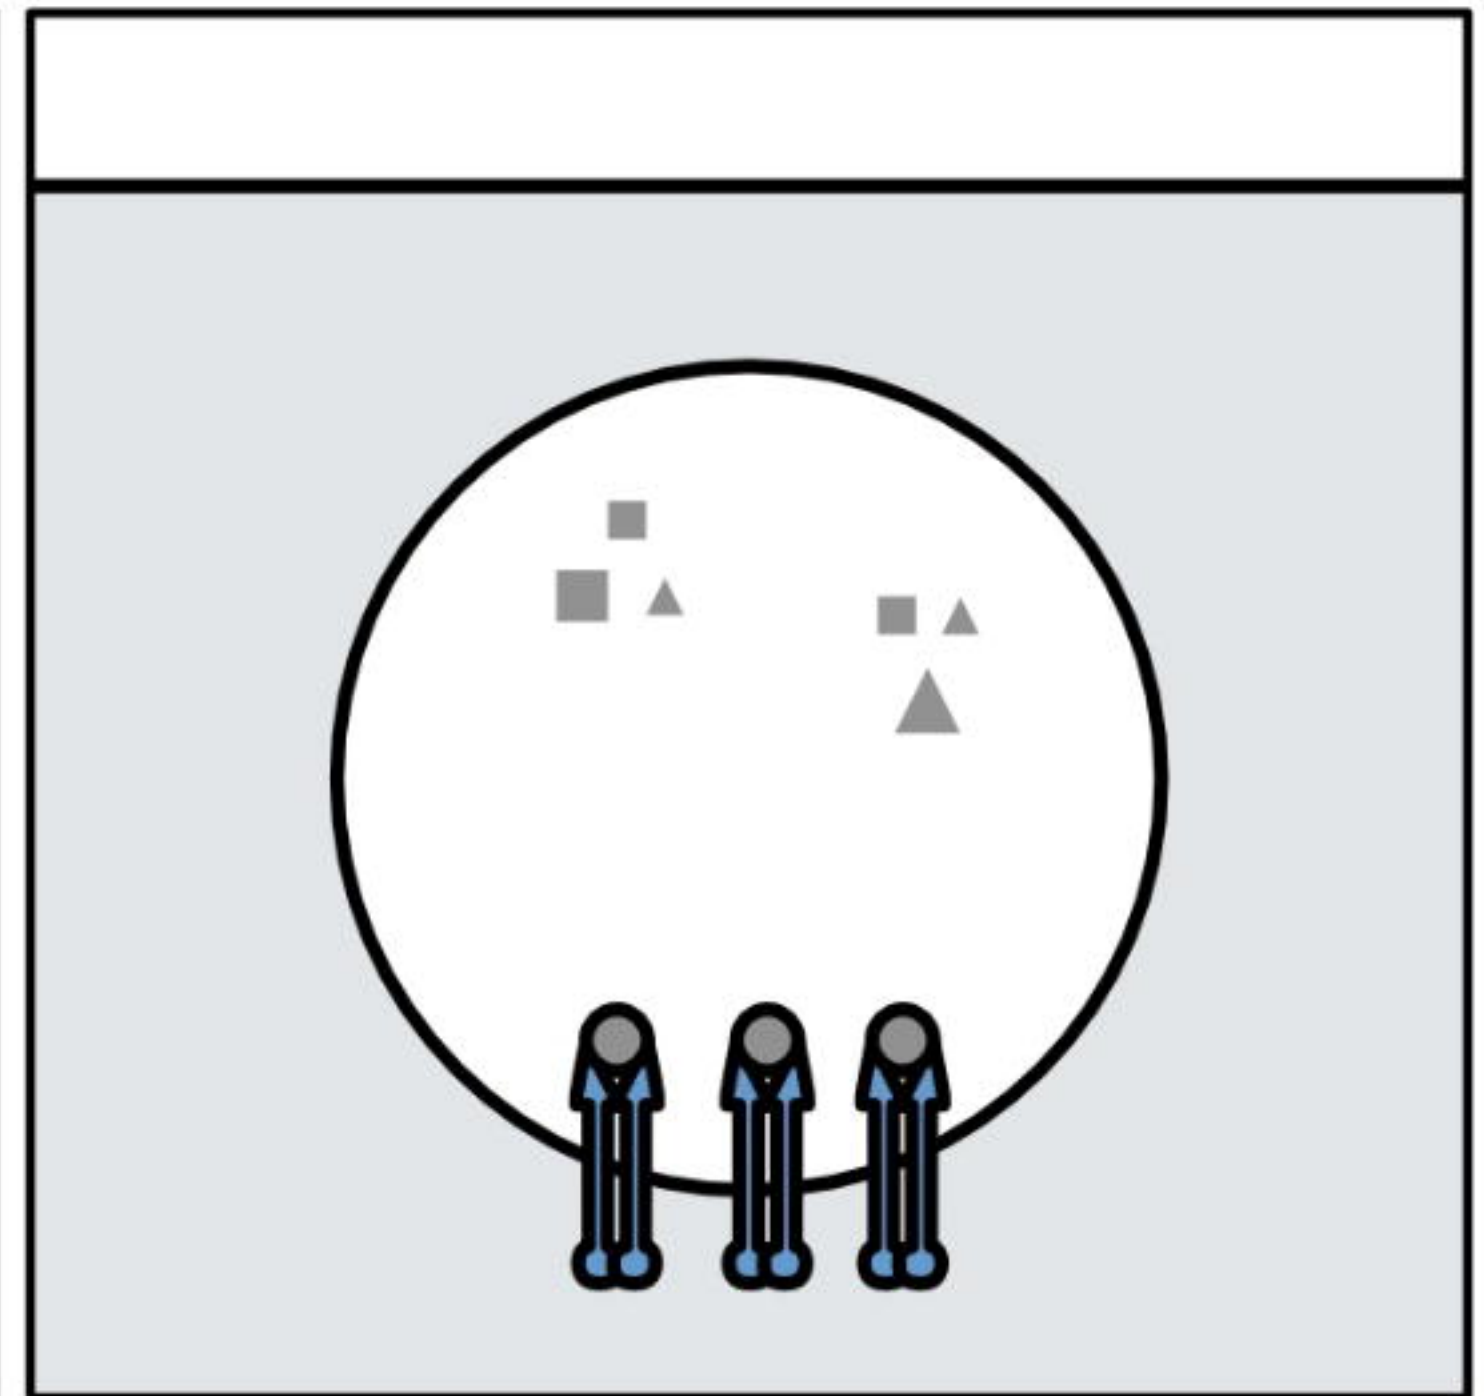

bioRxiv preprint doi: <https://doi.org/10.1101/2021.06.18.448076>; this version posted June 18, 2021. The copyright holder for this preprint (which was not certified by peer review) is the author/funder. All rights reserved. No reuse allowed without permission.

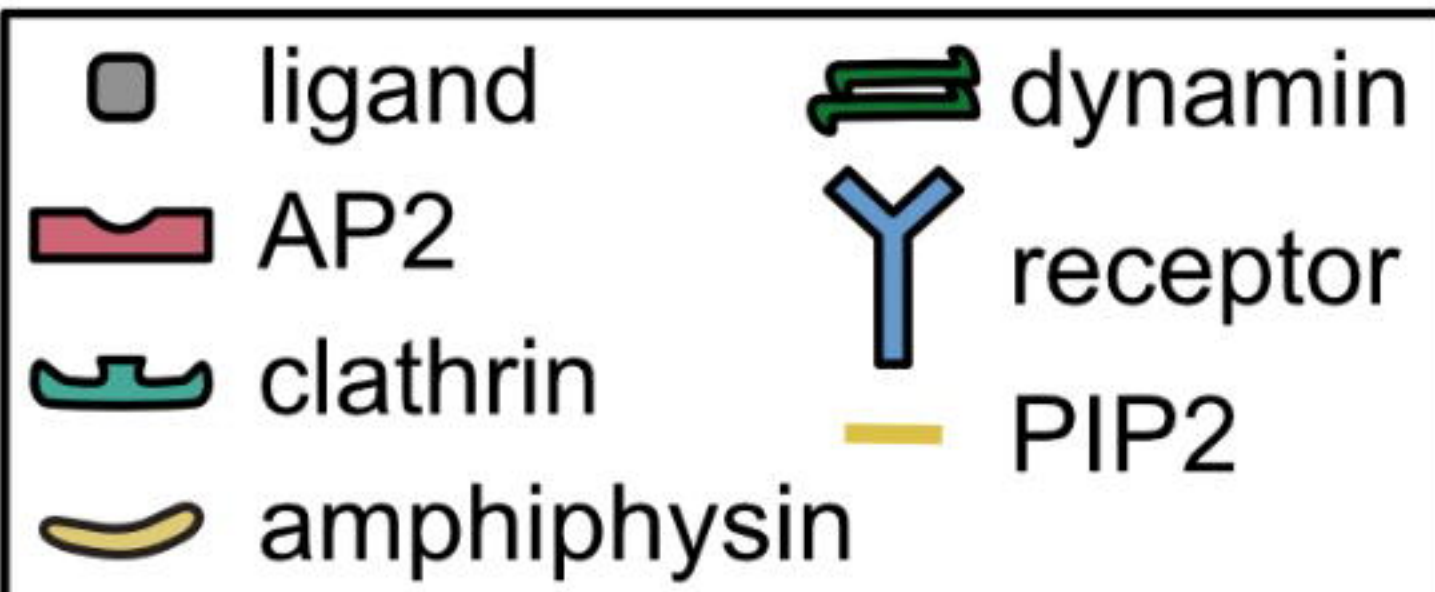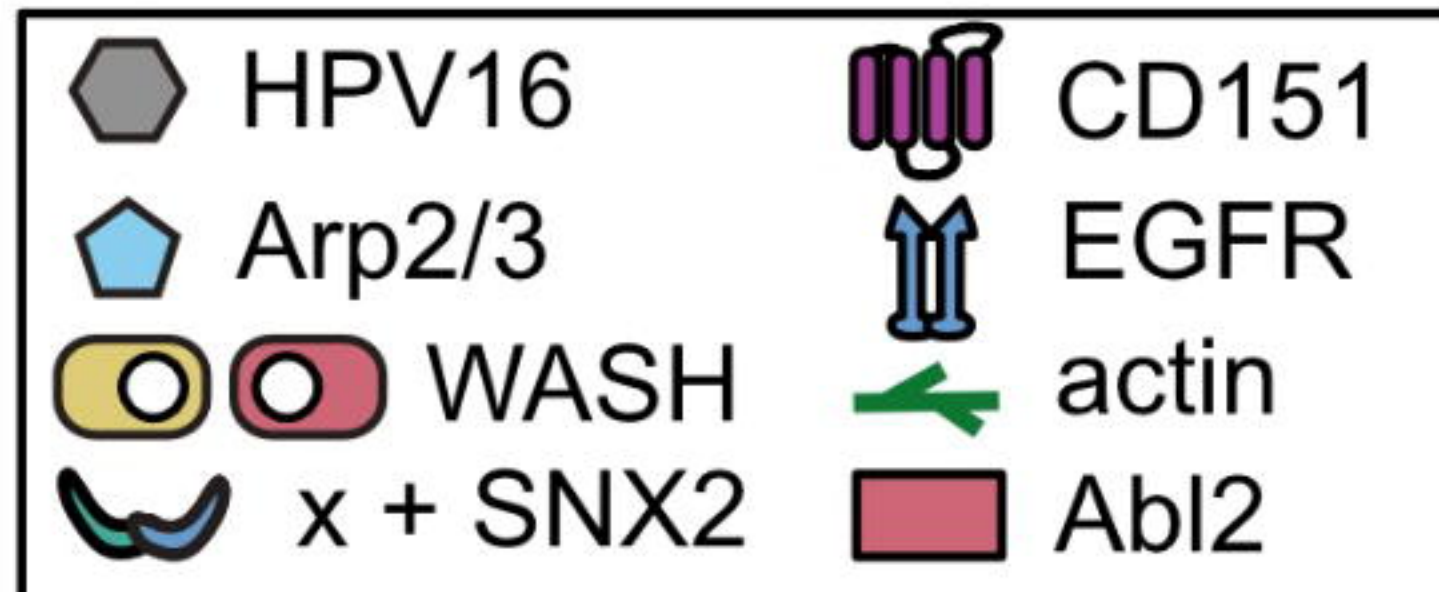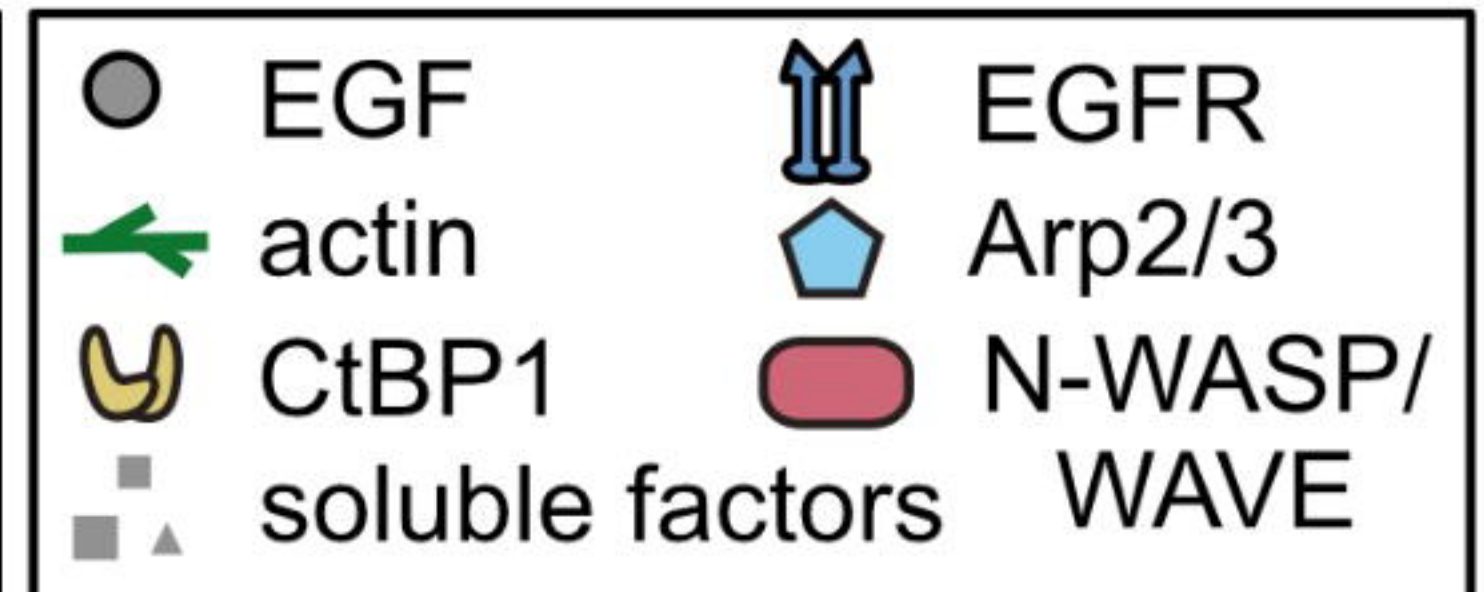

Source: http://biorxiv.org/content/10.1101/2021.06.18.448076v1.full.pdf
